# Supplementary material for: Forced Degradation of an Anticancer Drug Apalutamide: Impurity Profiling and Structure Elucidation Study
Source: Research Square preprint supplement (doi:10.21203/rs.3.rs-3309259/v1), 2023-09-06
Supplement: Supplementary file 1 [file 682f7a45003616b575f6b49f.docx]

**Forced Degradation of an Anticancer Drug Apalutamide: Impurity Profiling and Structure Elucidation Study**

Rekha Sapkal1, Sadaf Quadri1, Rupali Mahajan1, Hara Prasad Padhy1, Amit Asthana2, Gananadhamu Samanthula1, Amol G. Dikundwar1*

1Department of Pharmaceutical Analysis, National Institute of Pharmaceutical Education and Research, Hyderabad

2Department of Medical Devices, National Institute of Pharmaceutical Education and Research, Hyderabad

Author for correspondence:

Dr. Amol G. Dikundwar (Email: [amol.dikundwar@niperhyd.ac.in](mailto:amol.dikundwar@niperhyd.ac.in))

**Supplementary information**

List of Figures

**Fig. S1**Preparative HPLC Chromatogram of DP-7

**Fig. S2**HRMS data of DP-1

**Fig. S3**Fragmentation pathway of DP-1

**Fig. S4**HRMS data of DP-2

**Fig. S5**Fragmentation pathway of DP-2

**Fig. S6**HRMS data of DP-3

**Fig. S7** Fragmentation pathway of DP-3

**Fig. S8** HRMS data of DP-4

**Fig. S9** Fragmentation pathway of DP-4

**Fig. S10** HRMS data of DP-5

**Fig. S11** Fragmentation pathway of DP-5

**Fig. S12** HRMS data of DP-6

**Fig. S13** Fragmentation pathway of DP-6

**Fig. S14** HRMS spectra of DP-7 in negative ion mode

**Fig. S15** LC-MS/MS fragmentation pathway of DP-7

**Fig. S16** 1H NMR of apalutamide

**Fig. S17** 1H NMR of DP-7

**Fig. S18** Overlay of 1H NMR of apalutamide and DP-7

**Fig. S19** Detailed reaction pathways for the formation of all the DPs

**List of Tables**

**Table S1** LC-Q-TOF-MS data of apalutamide degradation products (DP-1 to DP-7)

**Table S2** Predicted degradation products by using Zeneth sofware


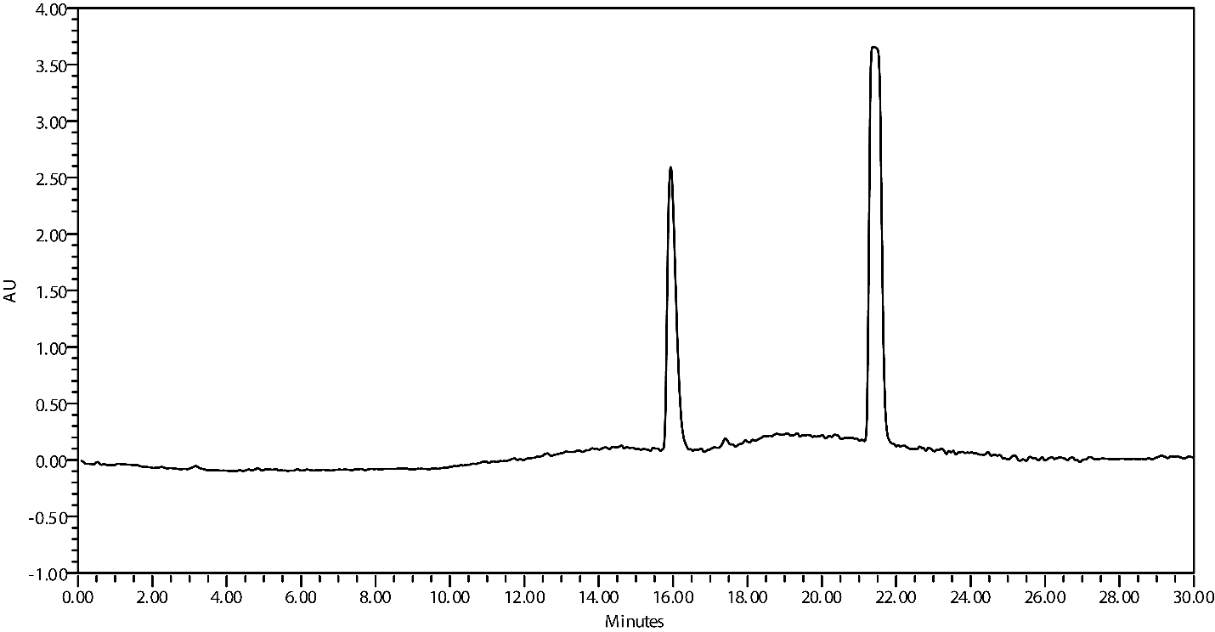


**Fig. S1** Preparative HPLC Chromatogram of DP-7


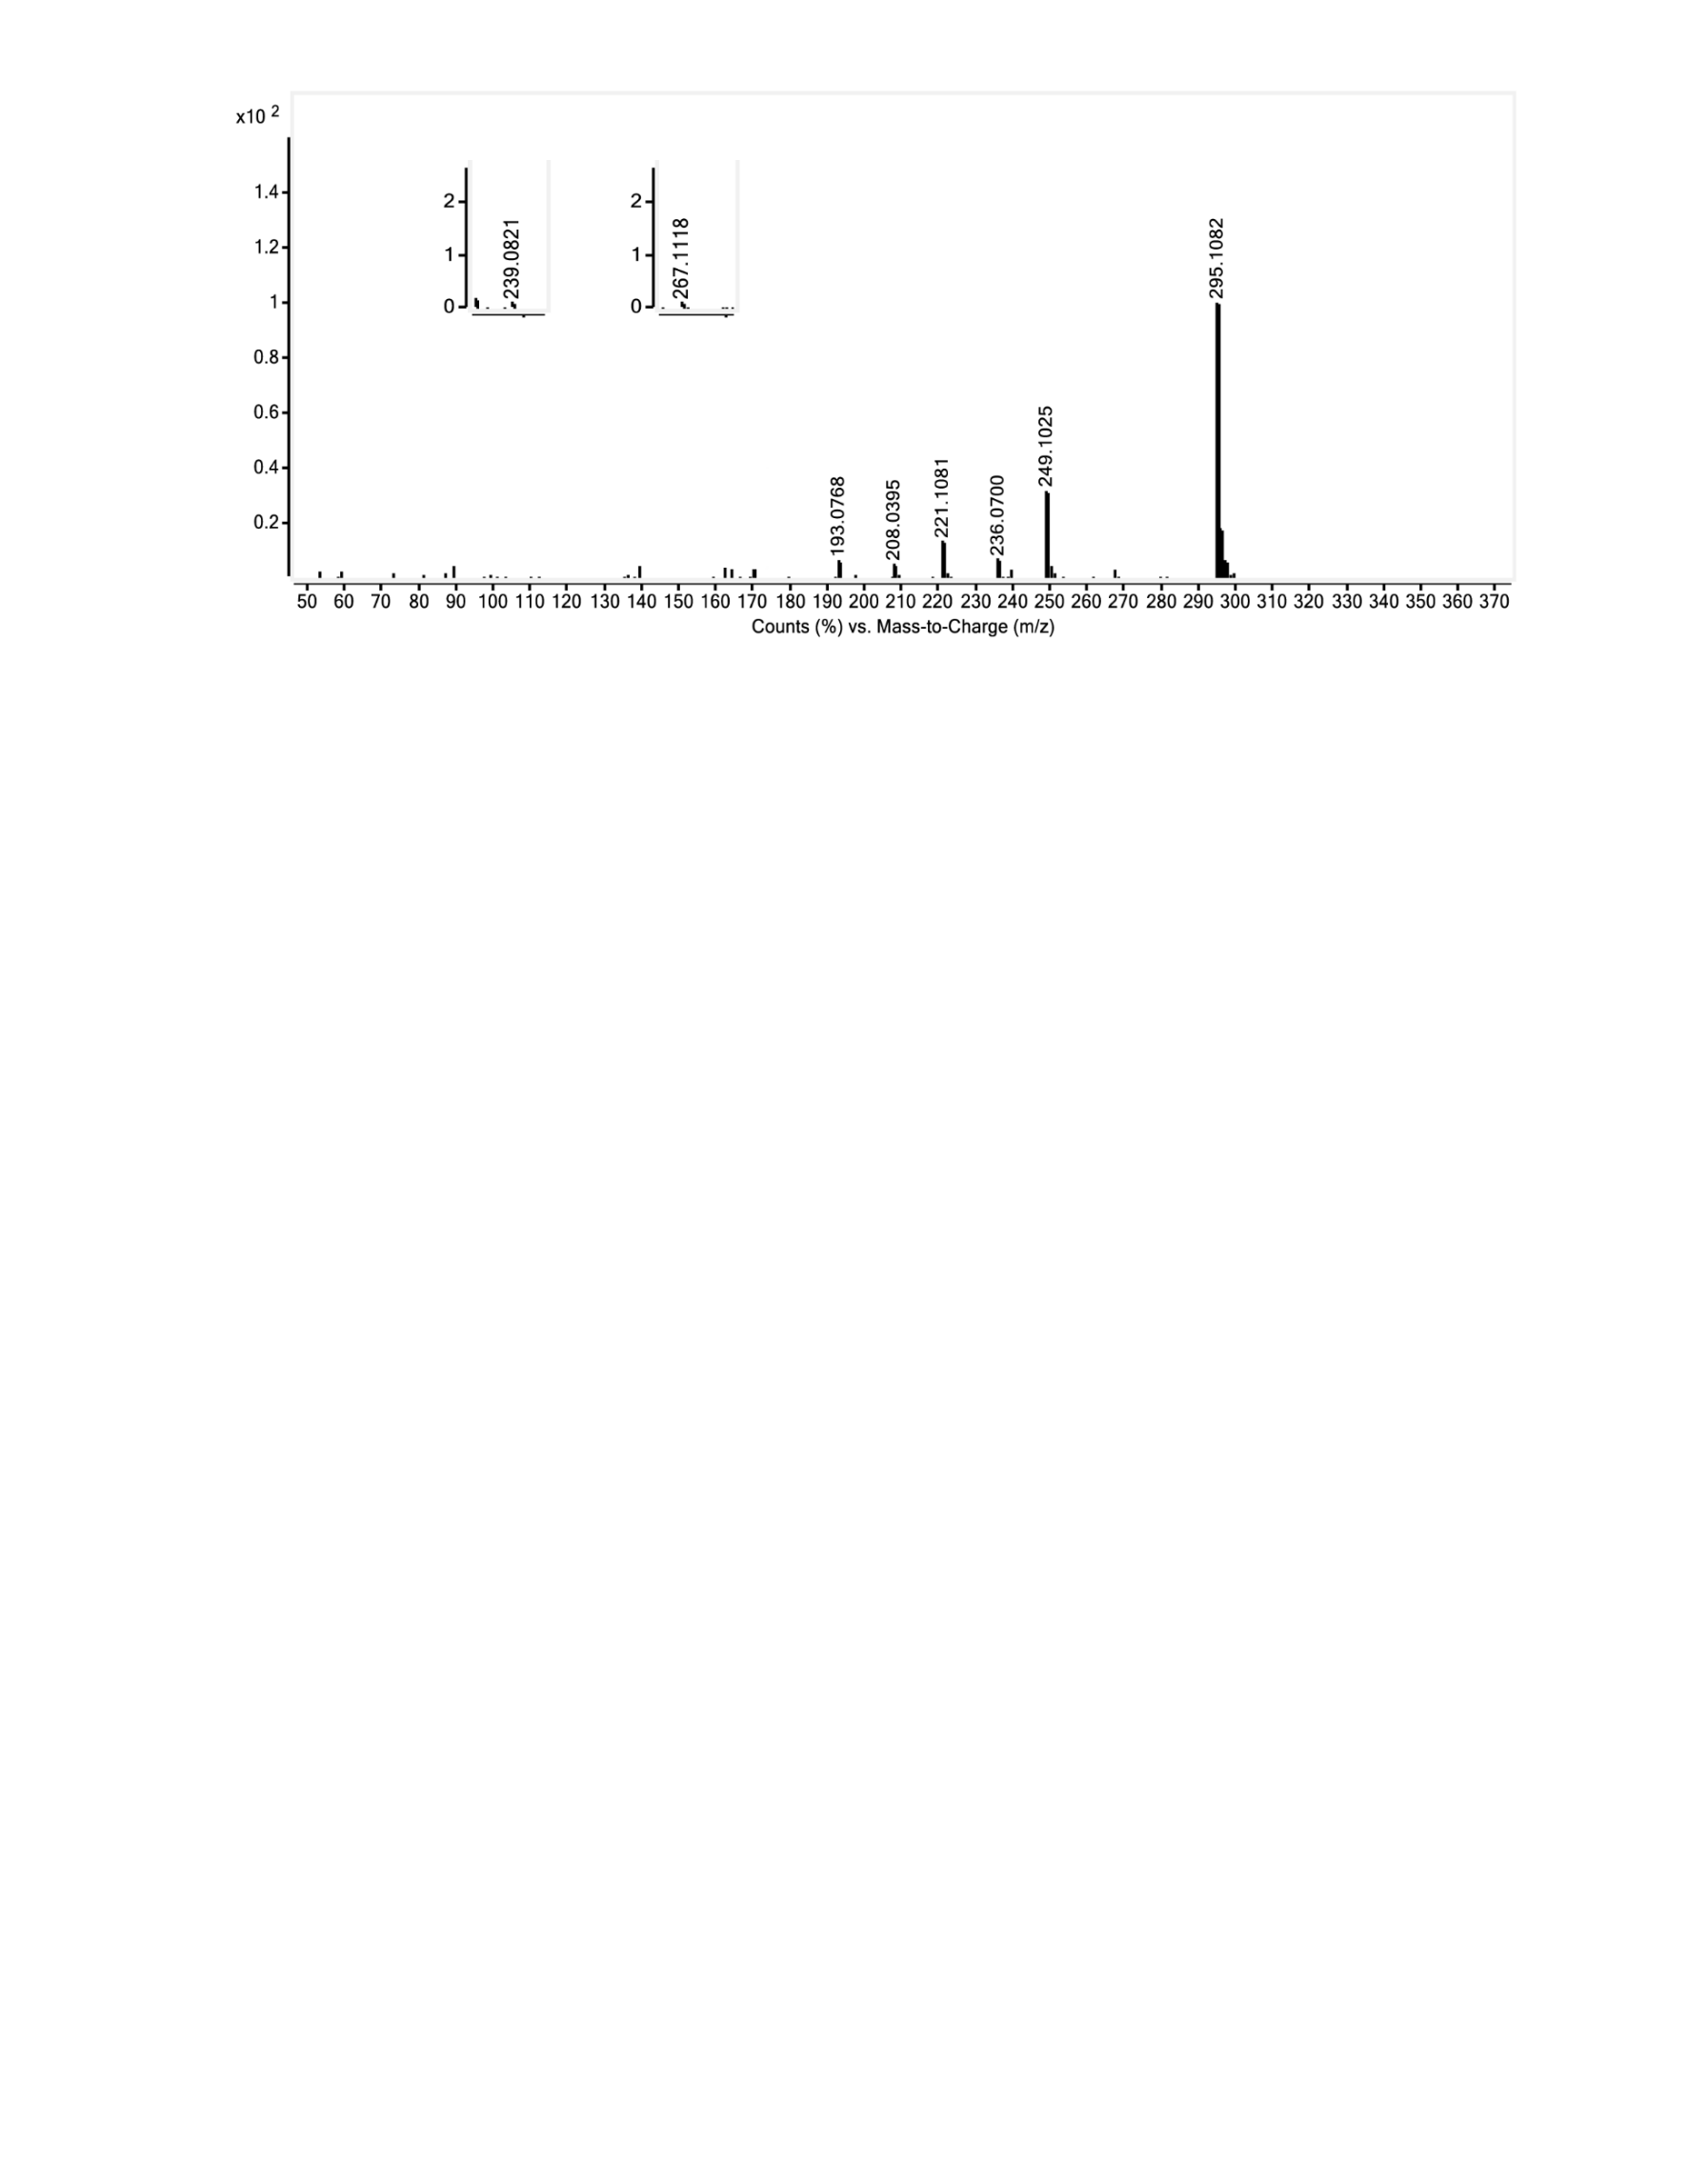


**Fig. S2** HRMS data of DP-1

­
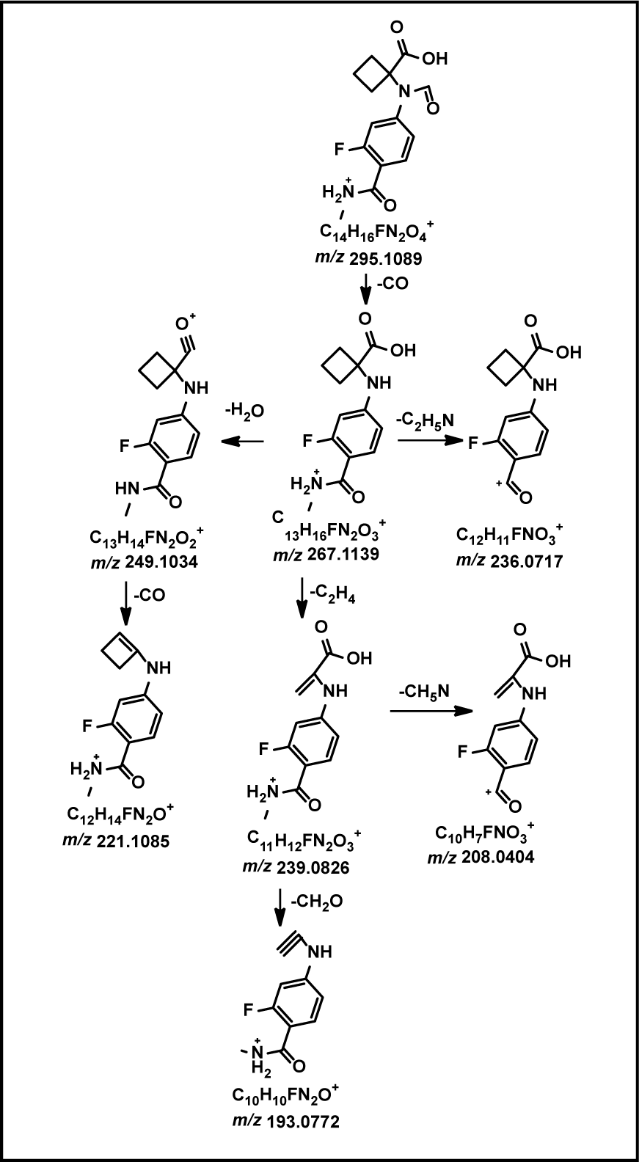


**Fig. S3** Fragmentation pathway of DP-1


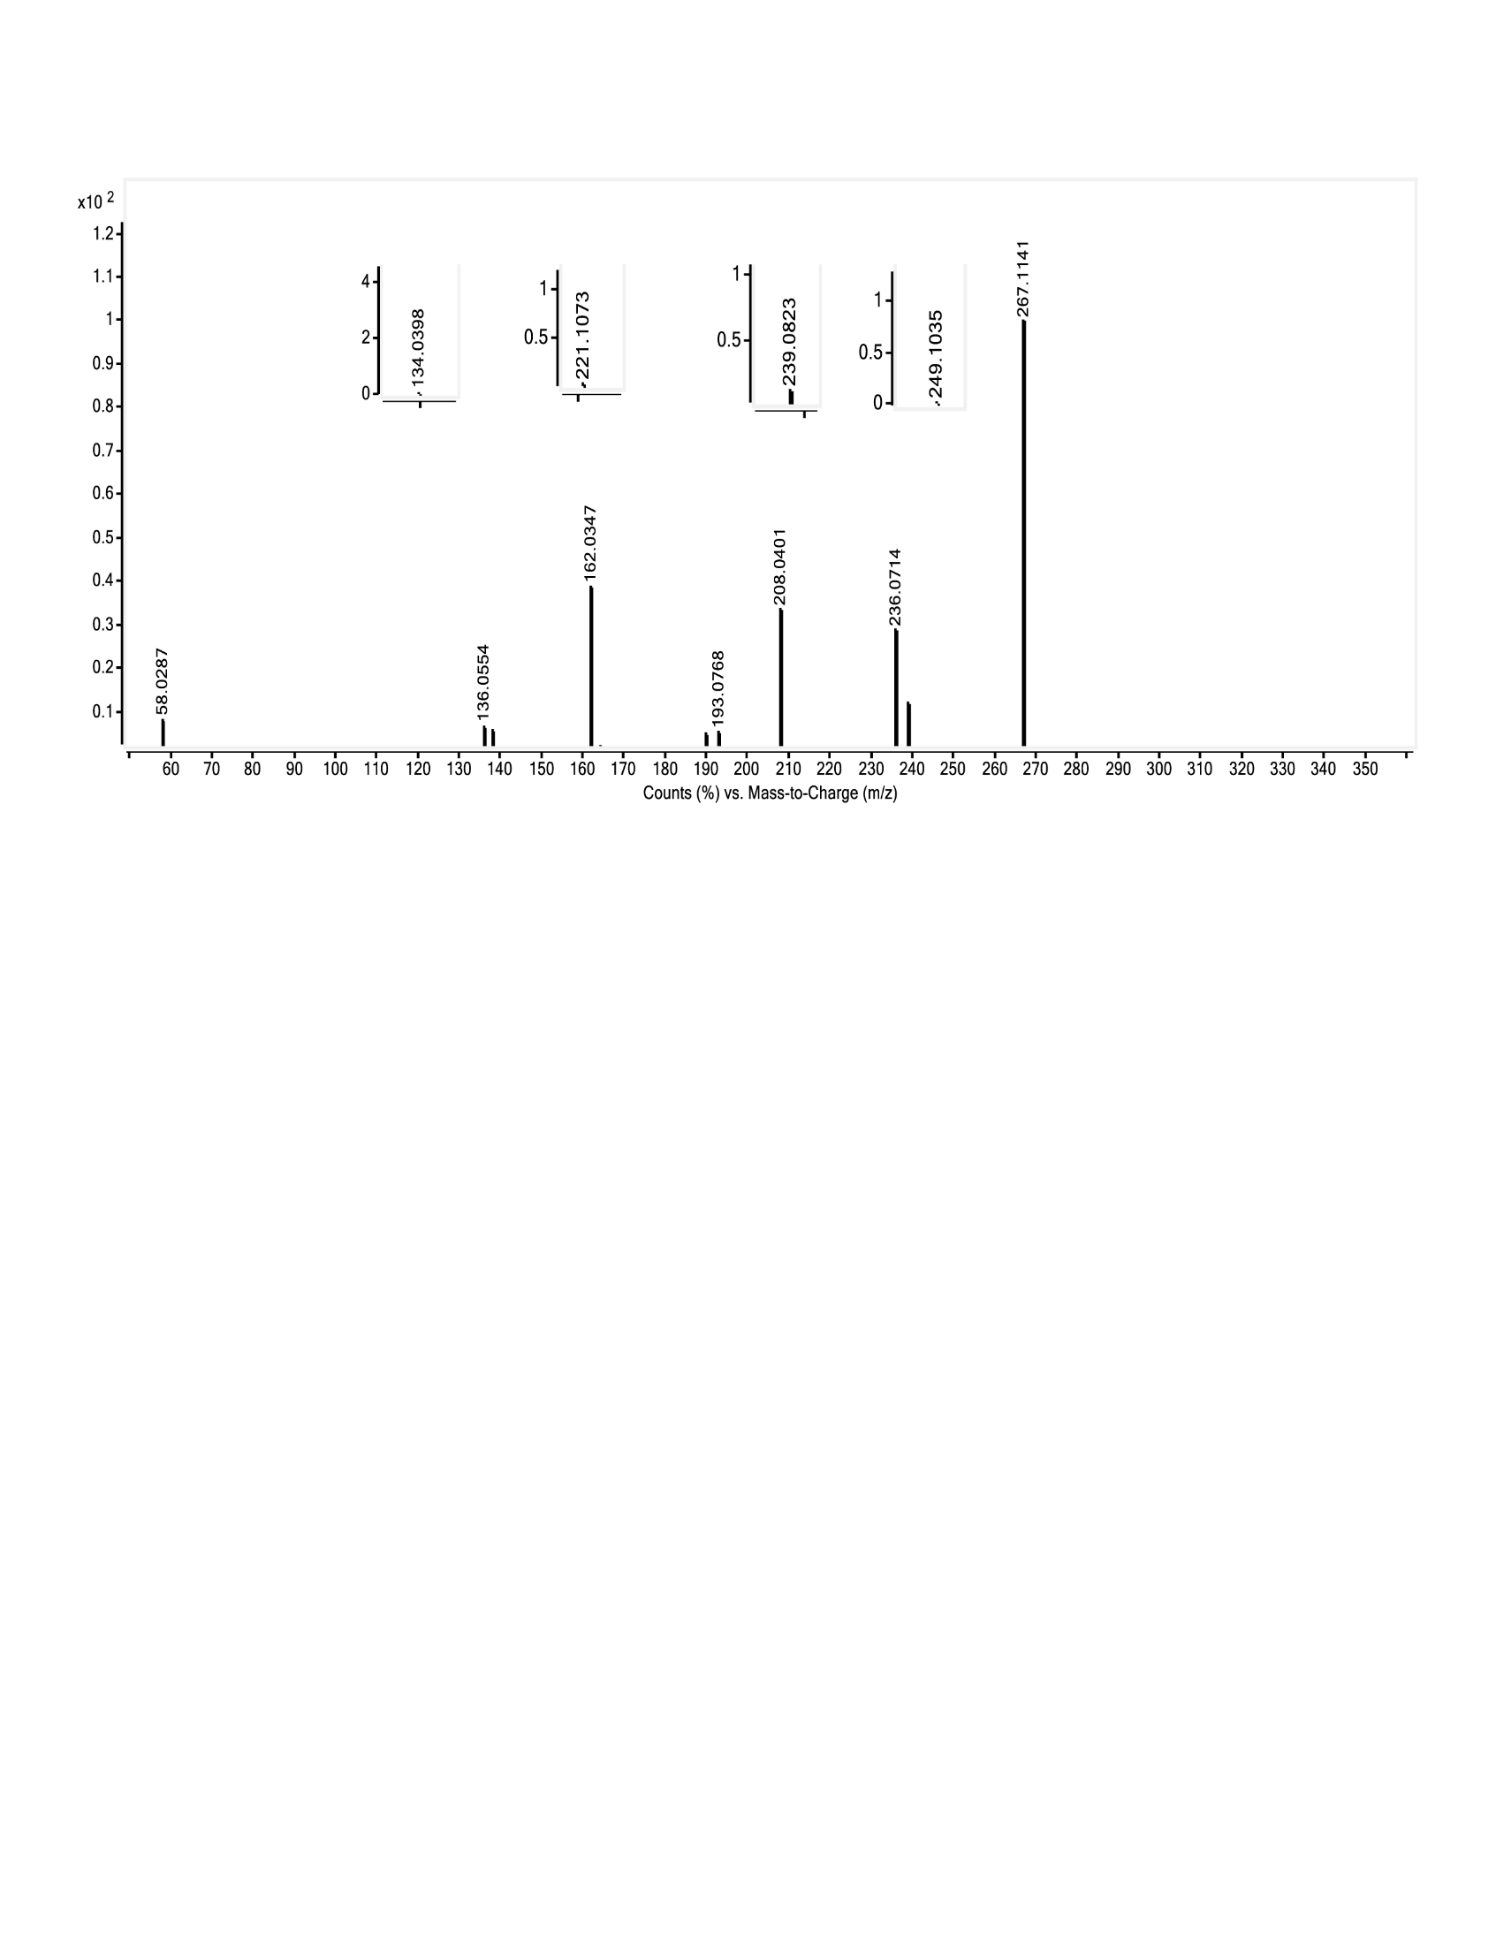


**Fig. S4** HRMS data of DP-2


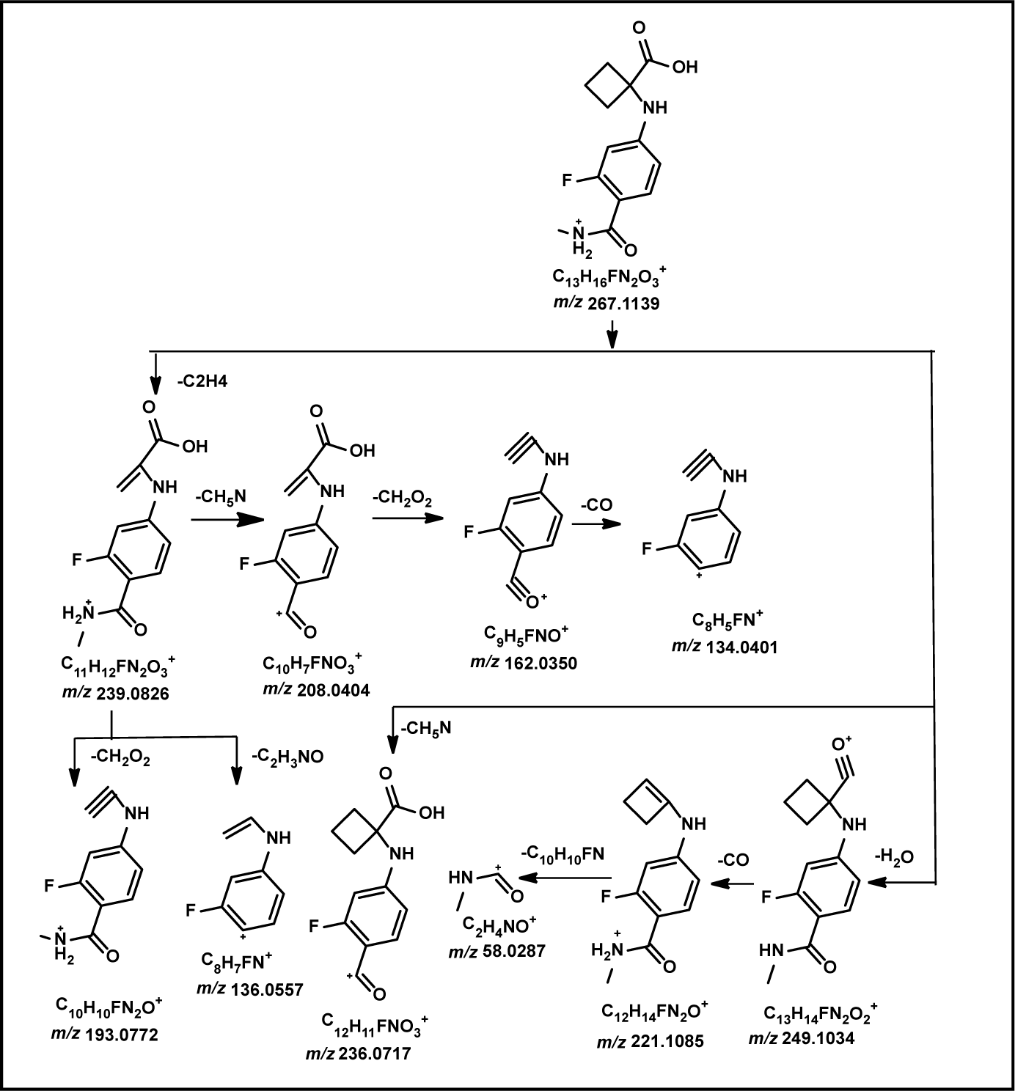


**Fig. S5** Fragmentation pathway of DP-2


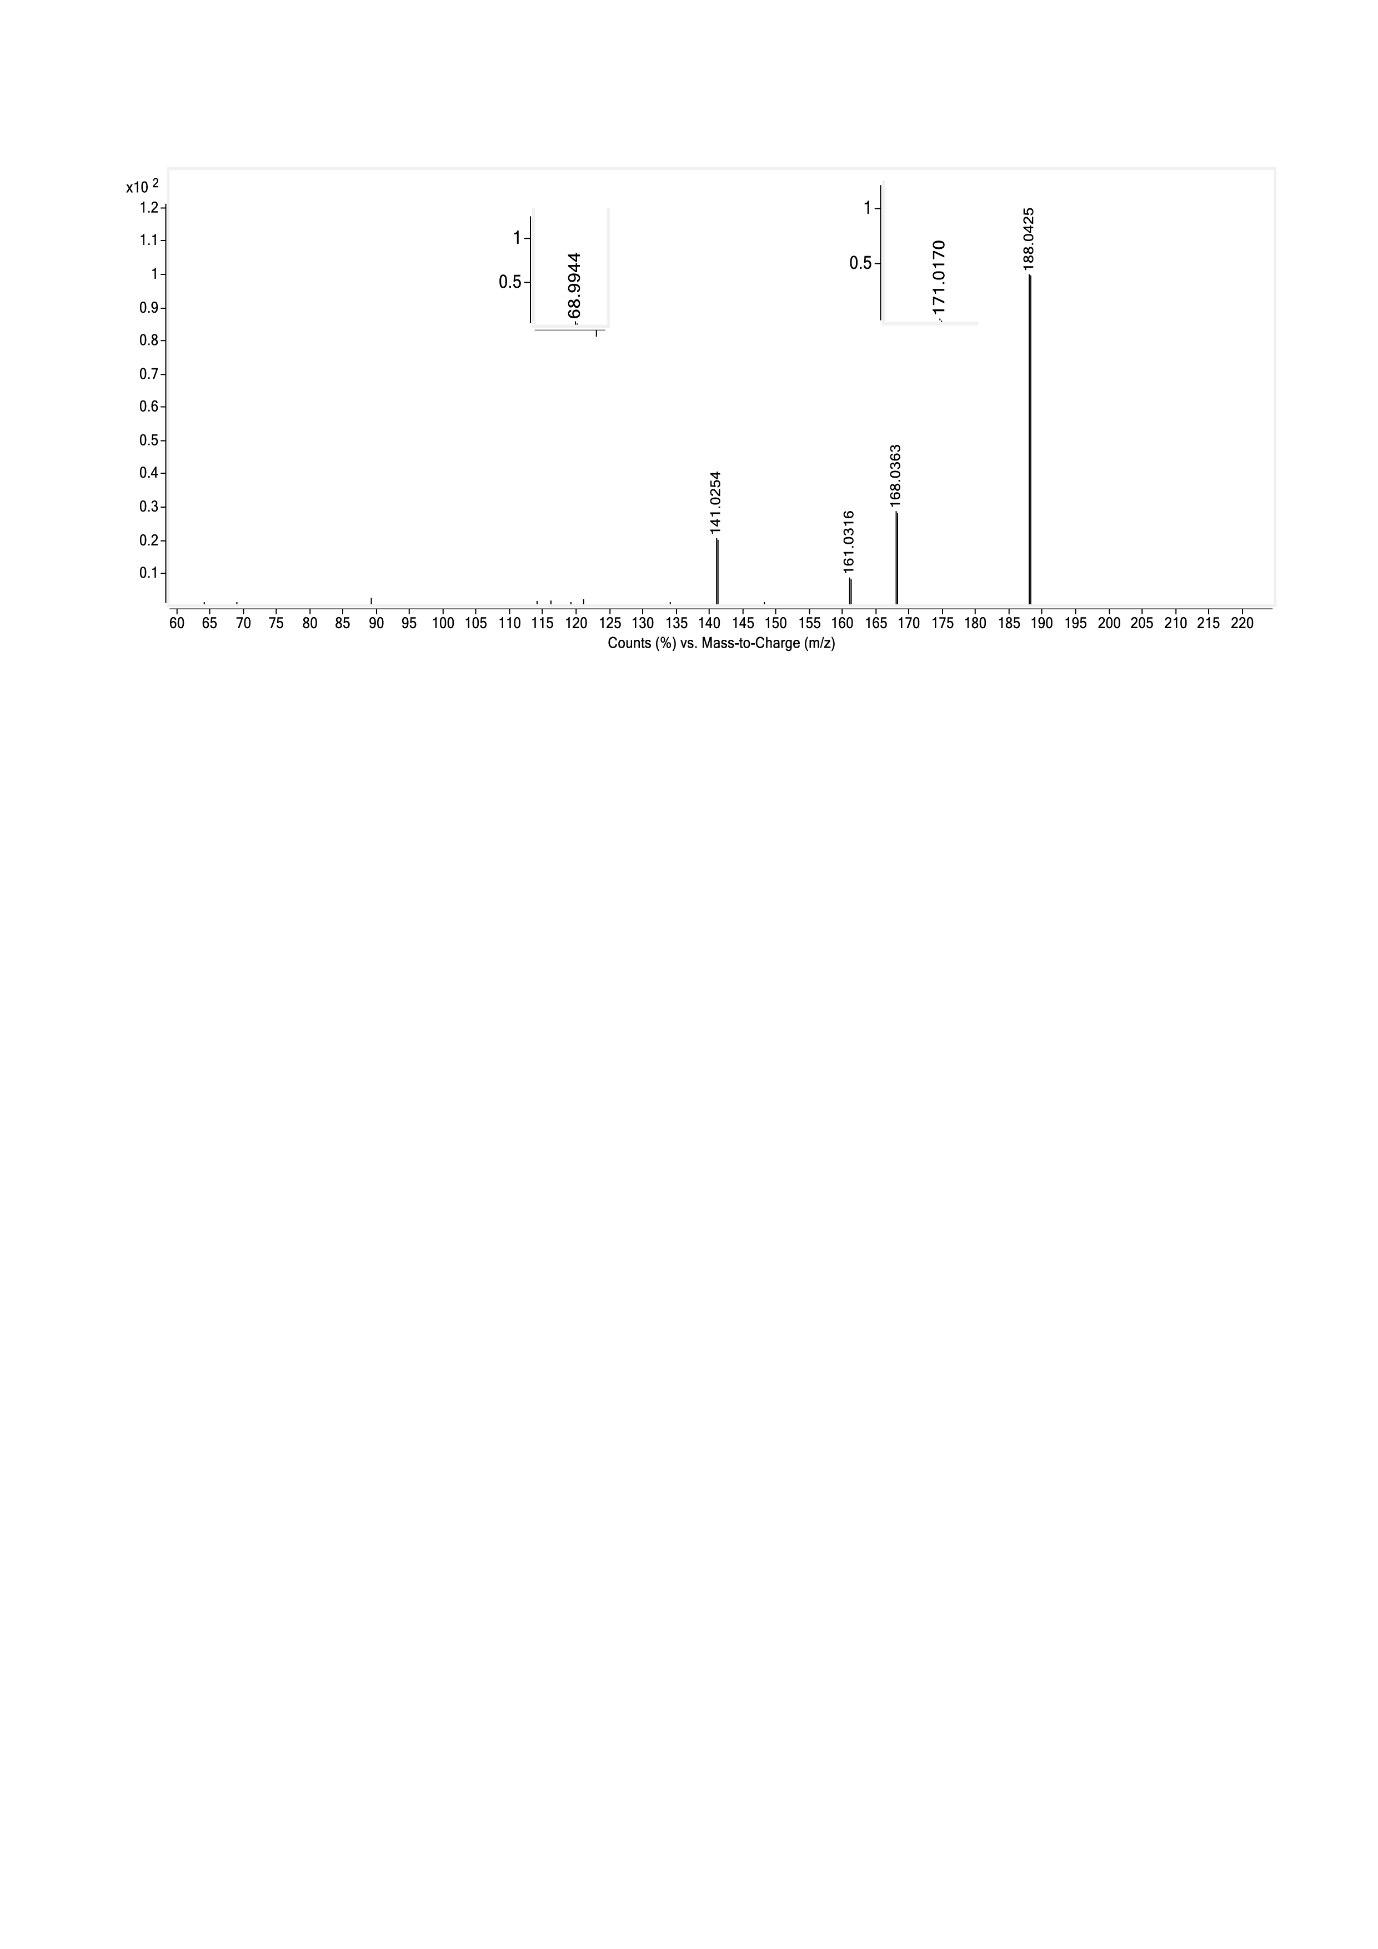


**Fig. S6** HRMS data of DP-3


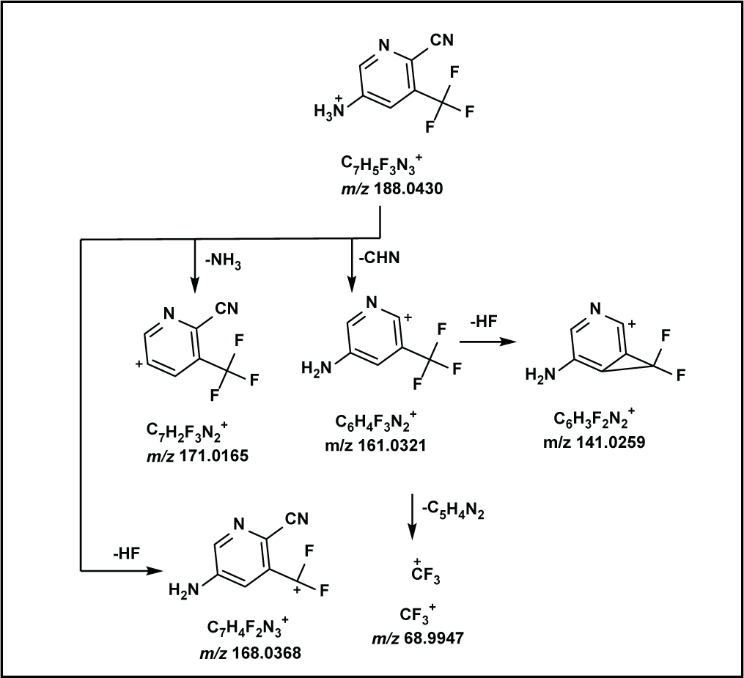


**Fig. S7** Fragmentation pathway of DP-3


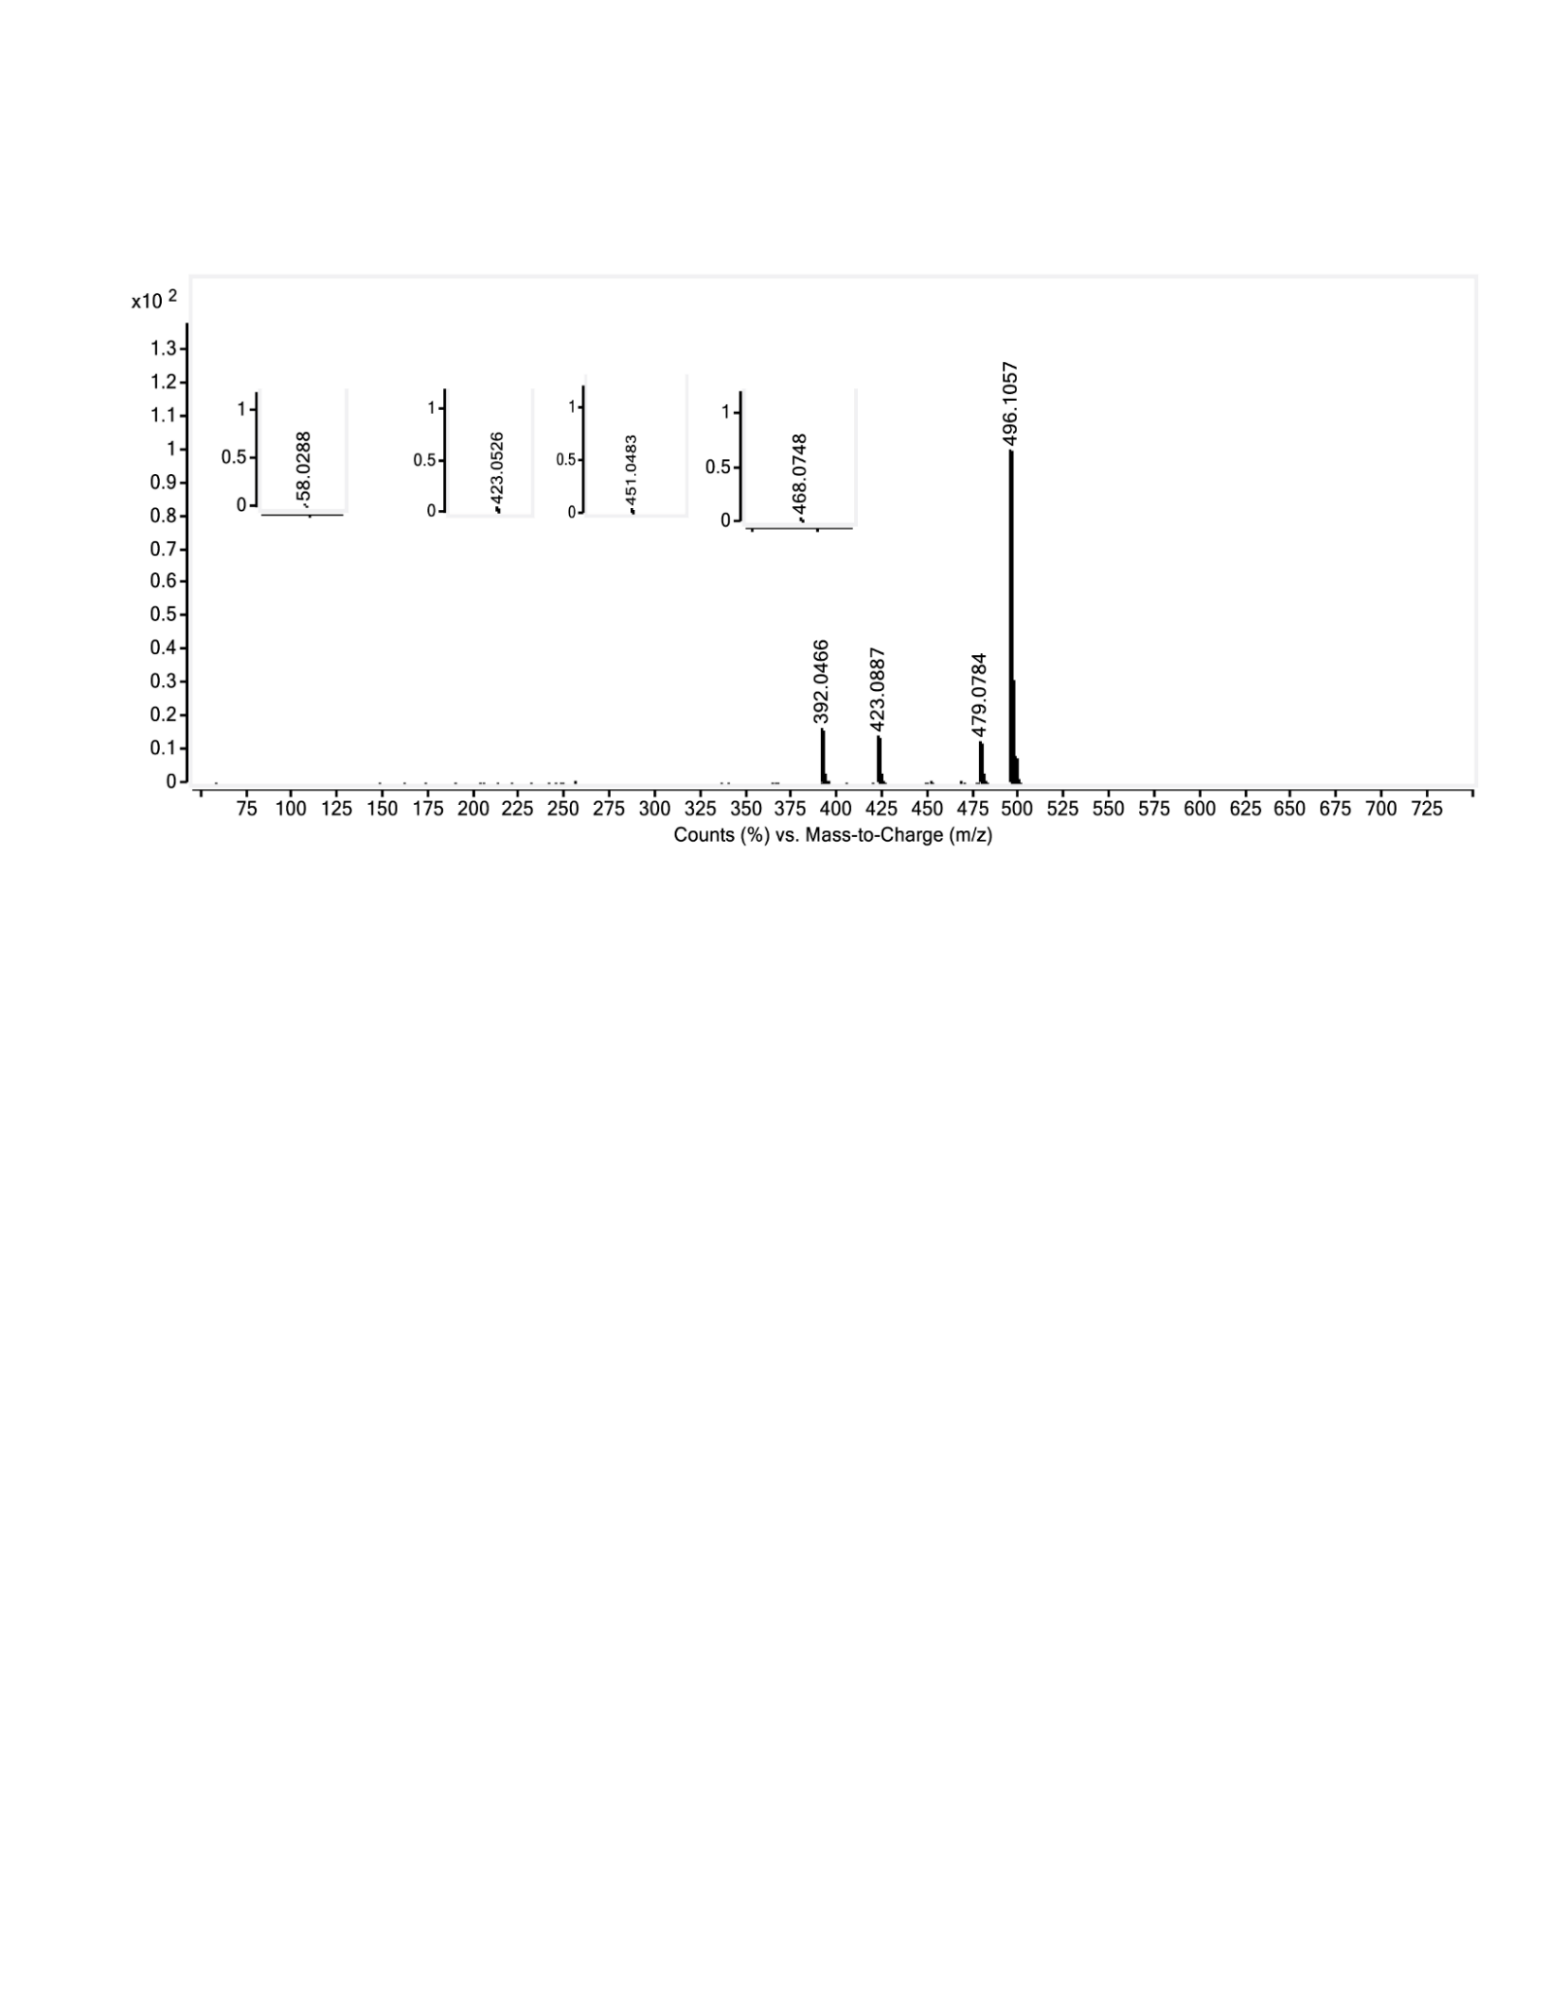


**Fig. S8** HRMS data of DP-4


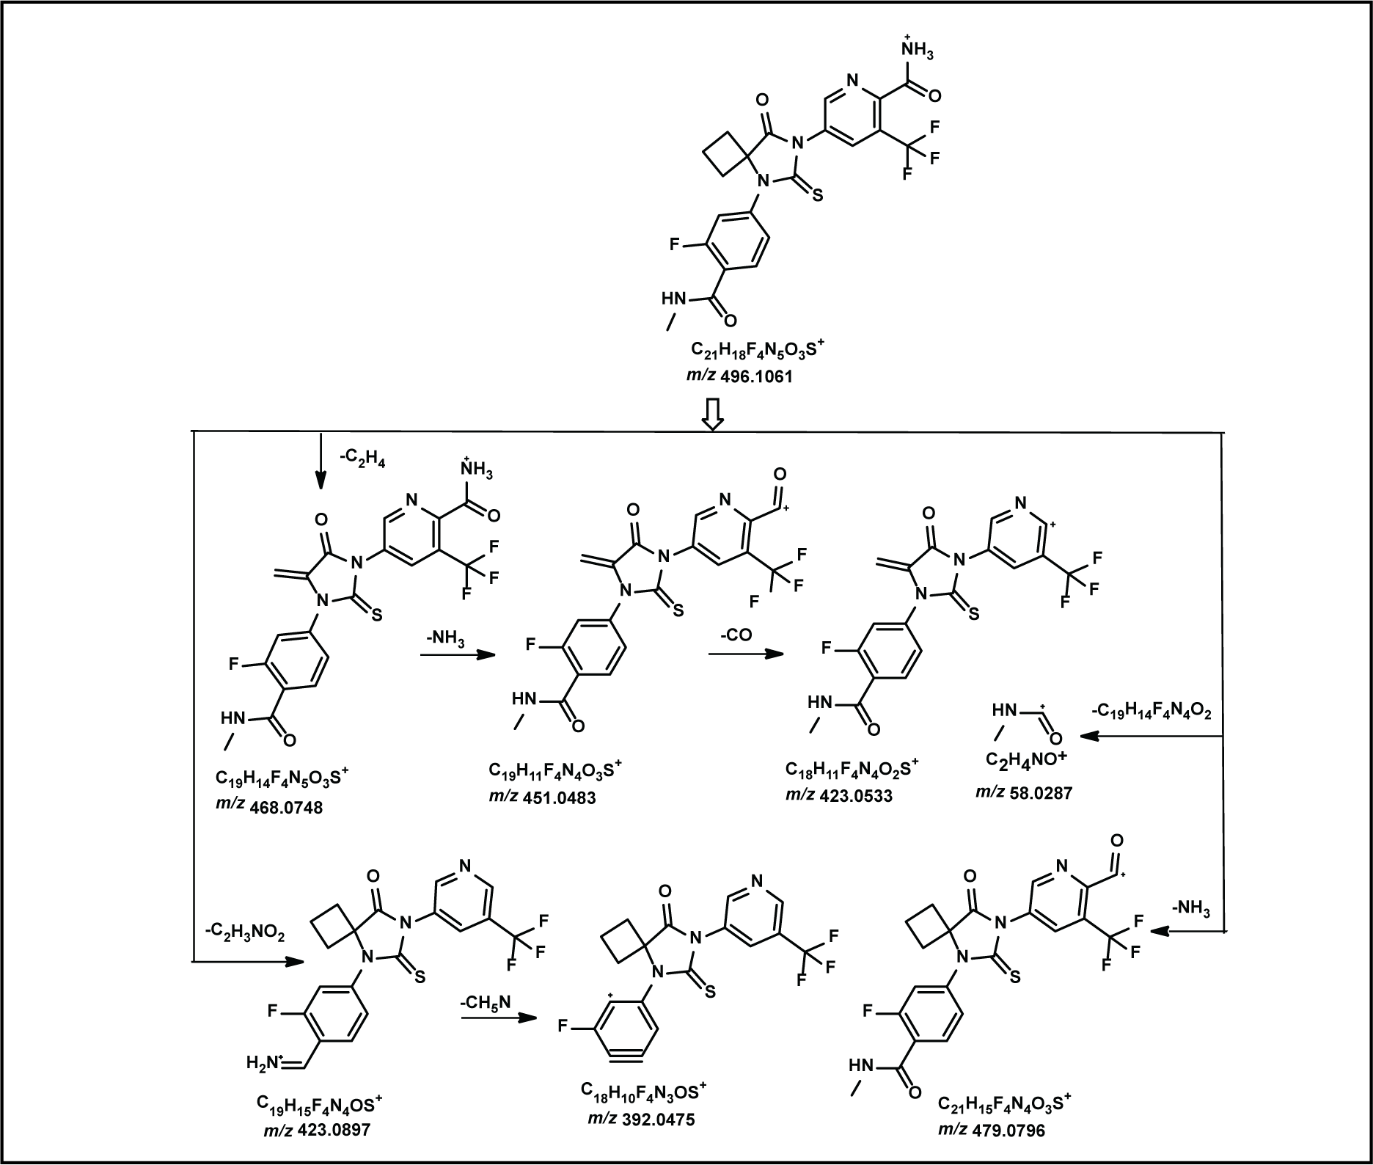


**Fig. S9** Fragmentation pathway of DP-4


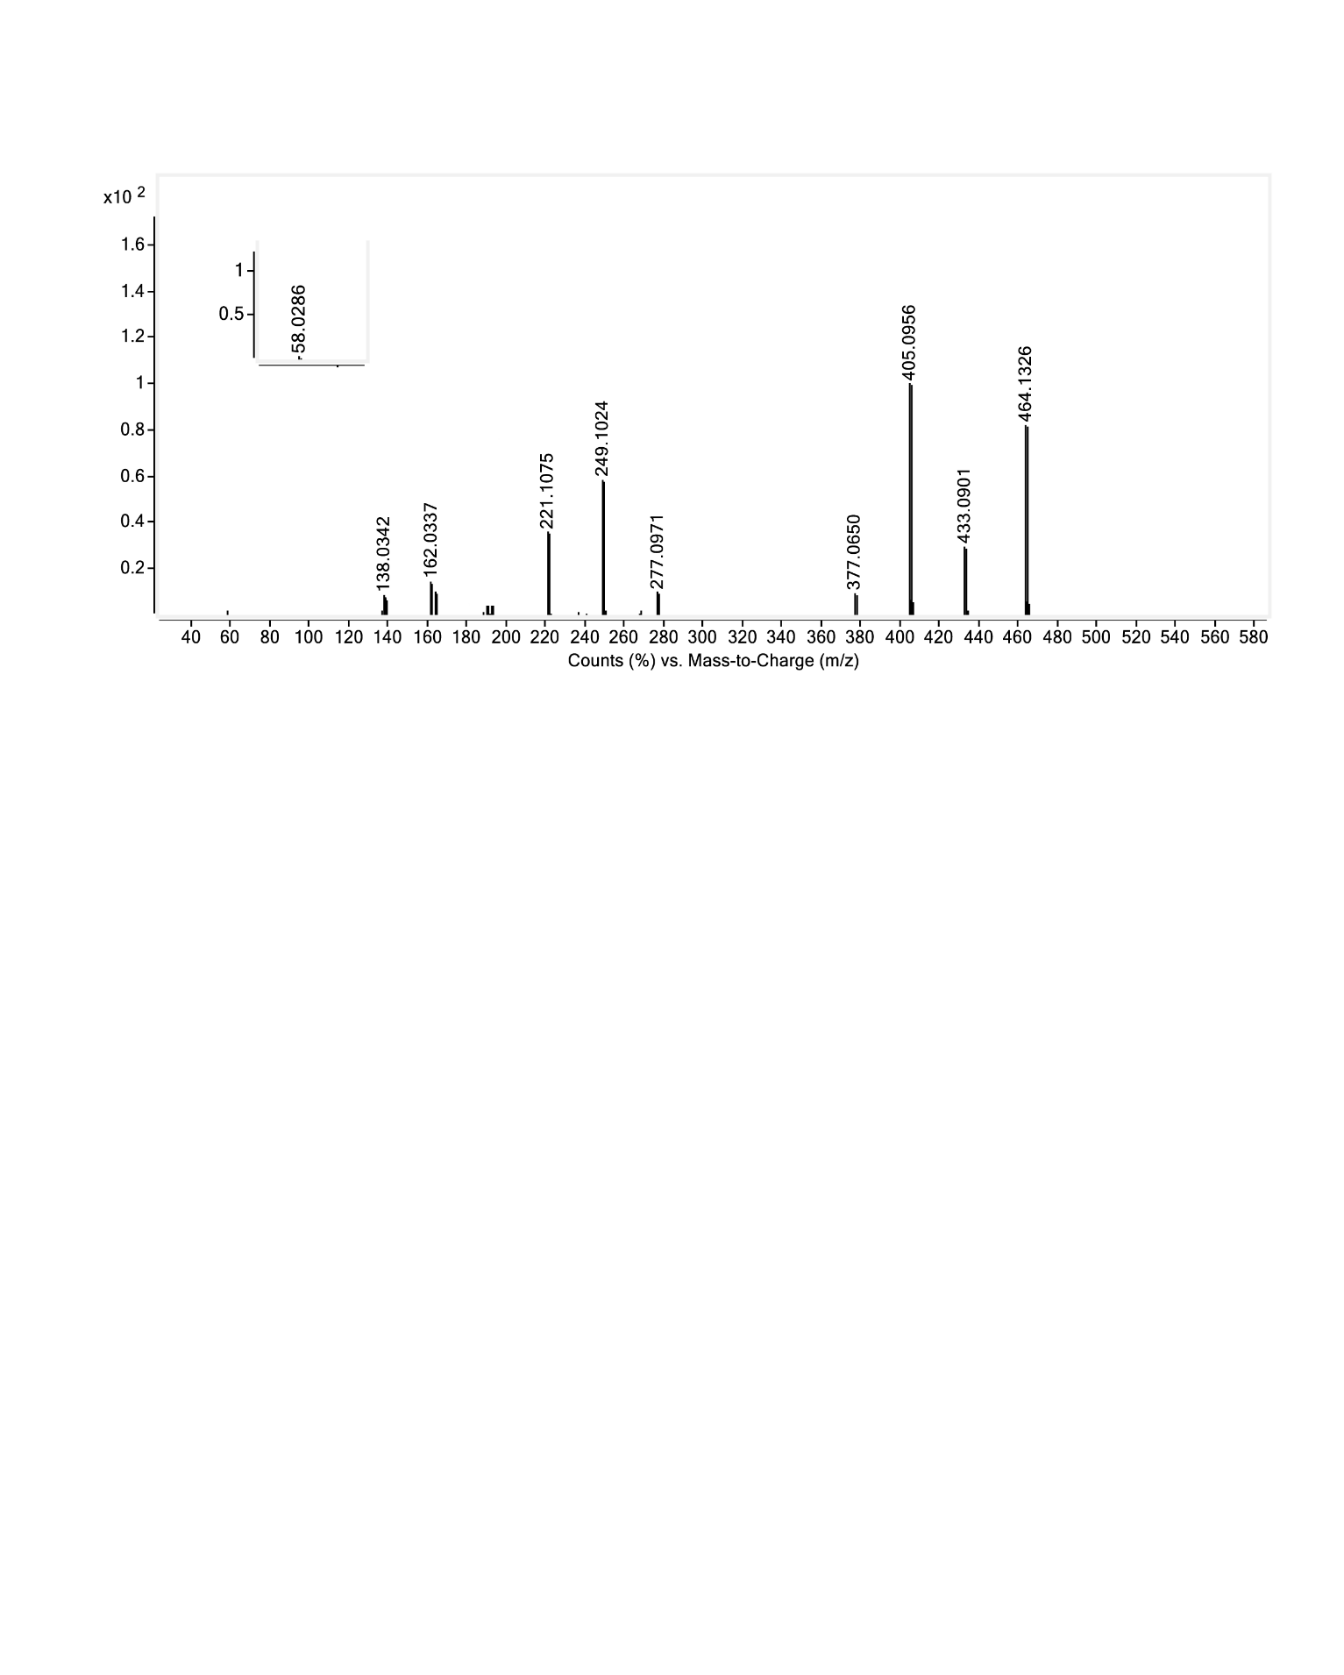


**Fig. S10** HRMS data of DP-5


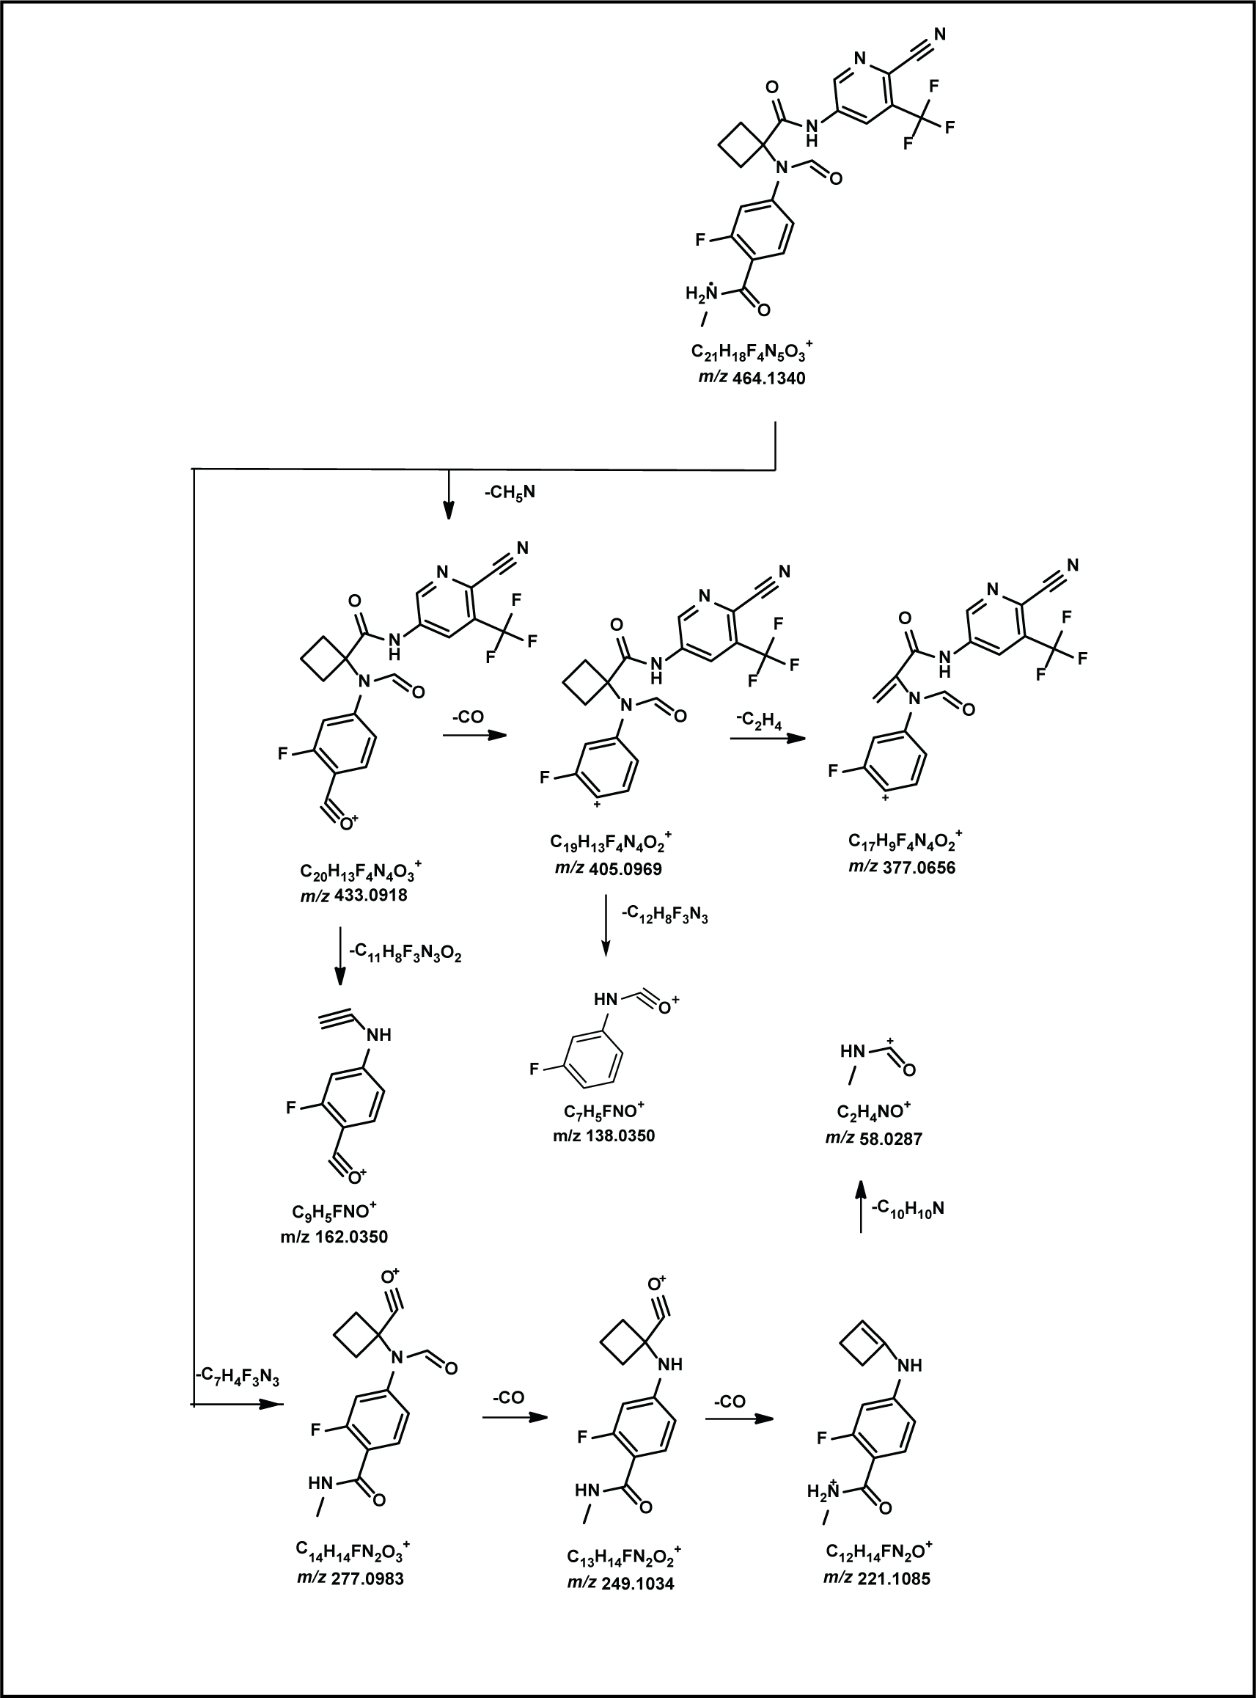


**Fig. S11** Fragmentation pathway of DP-5


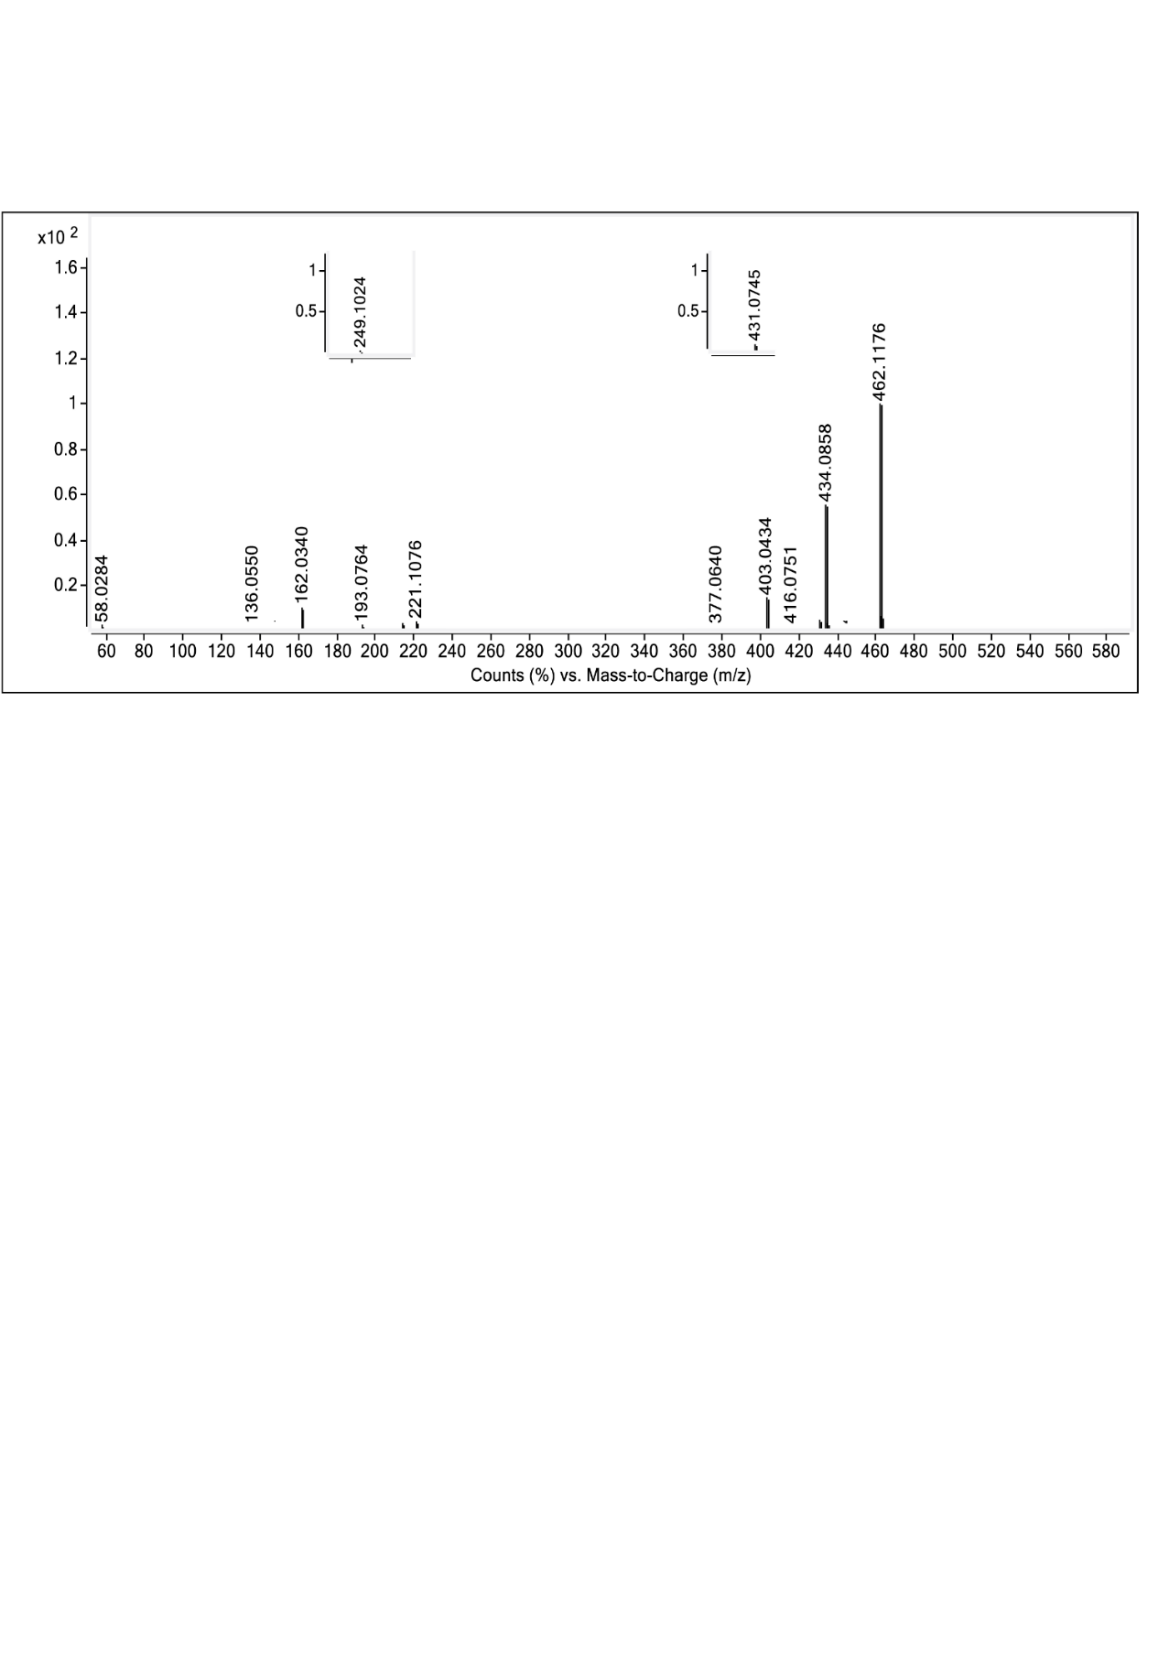


**Fig. S12** HRMS data of DP-6


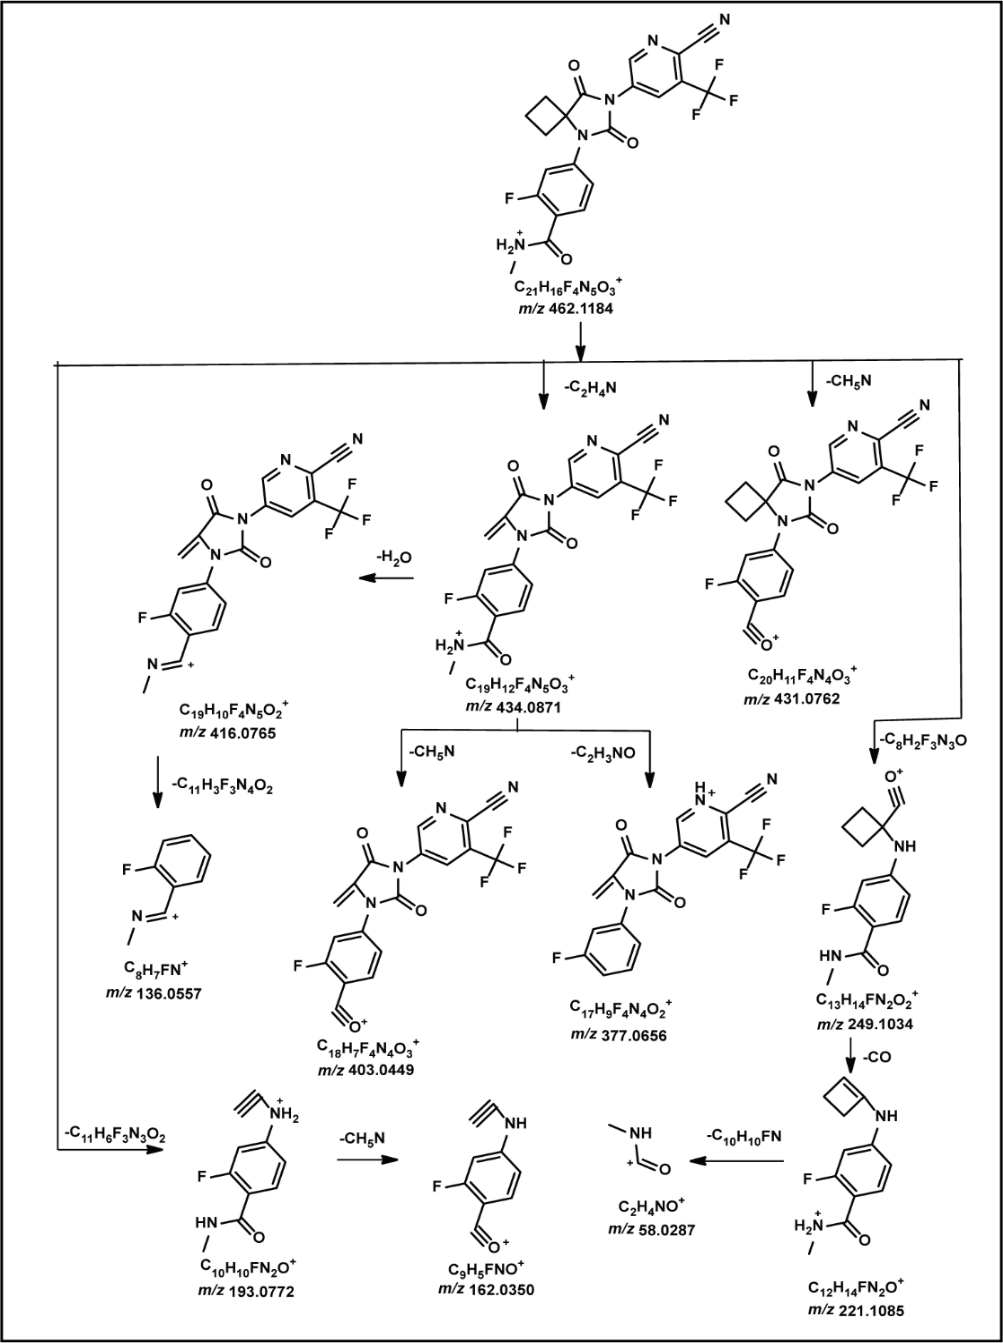


**Fig. S13** Fragmentation pathway of DP-6


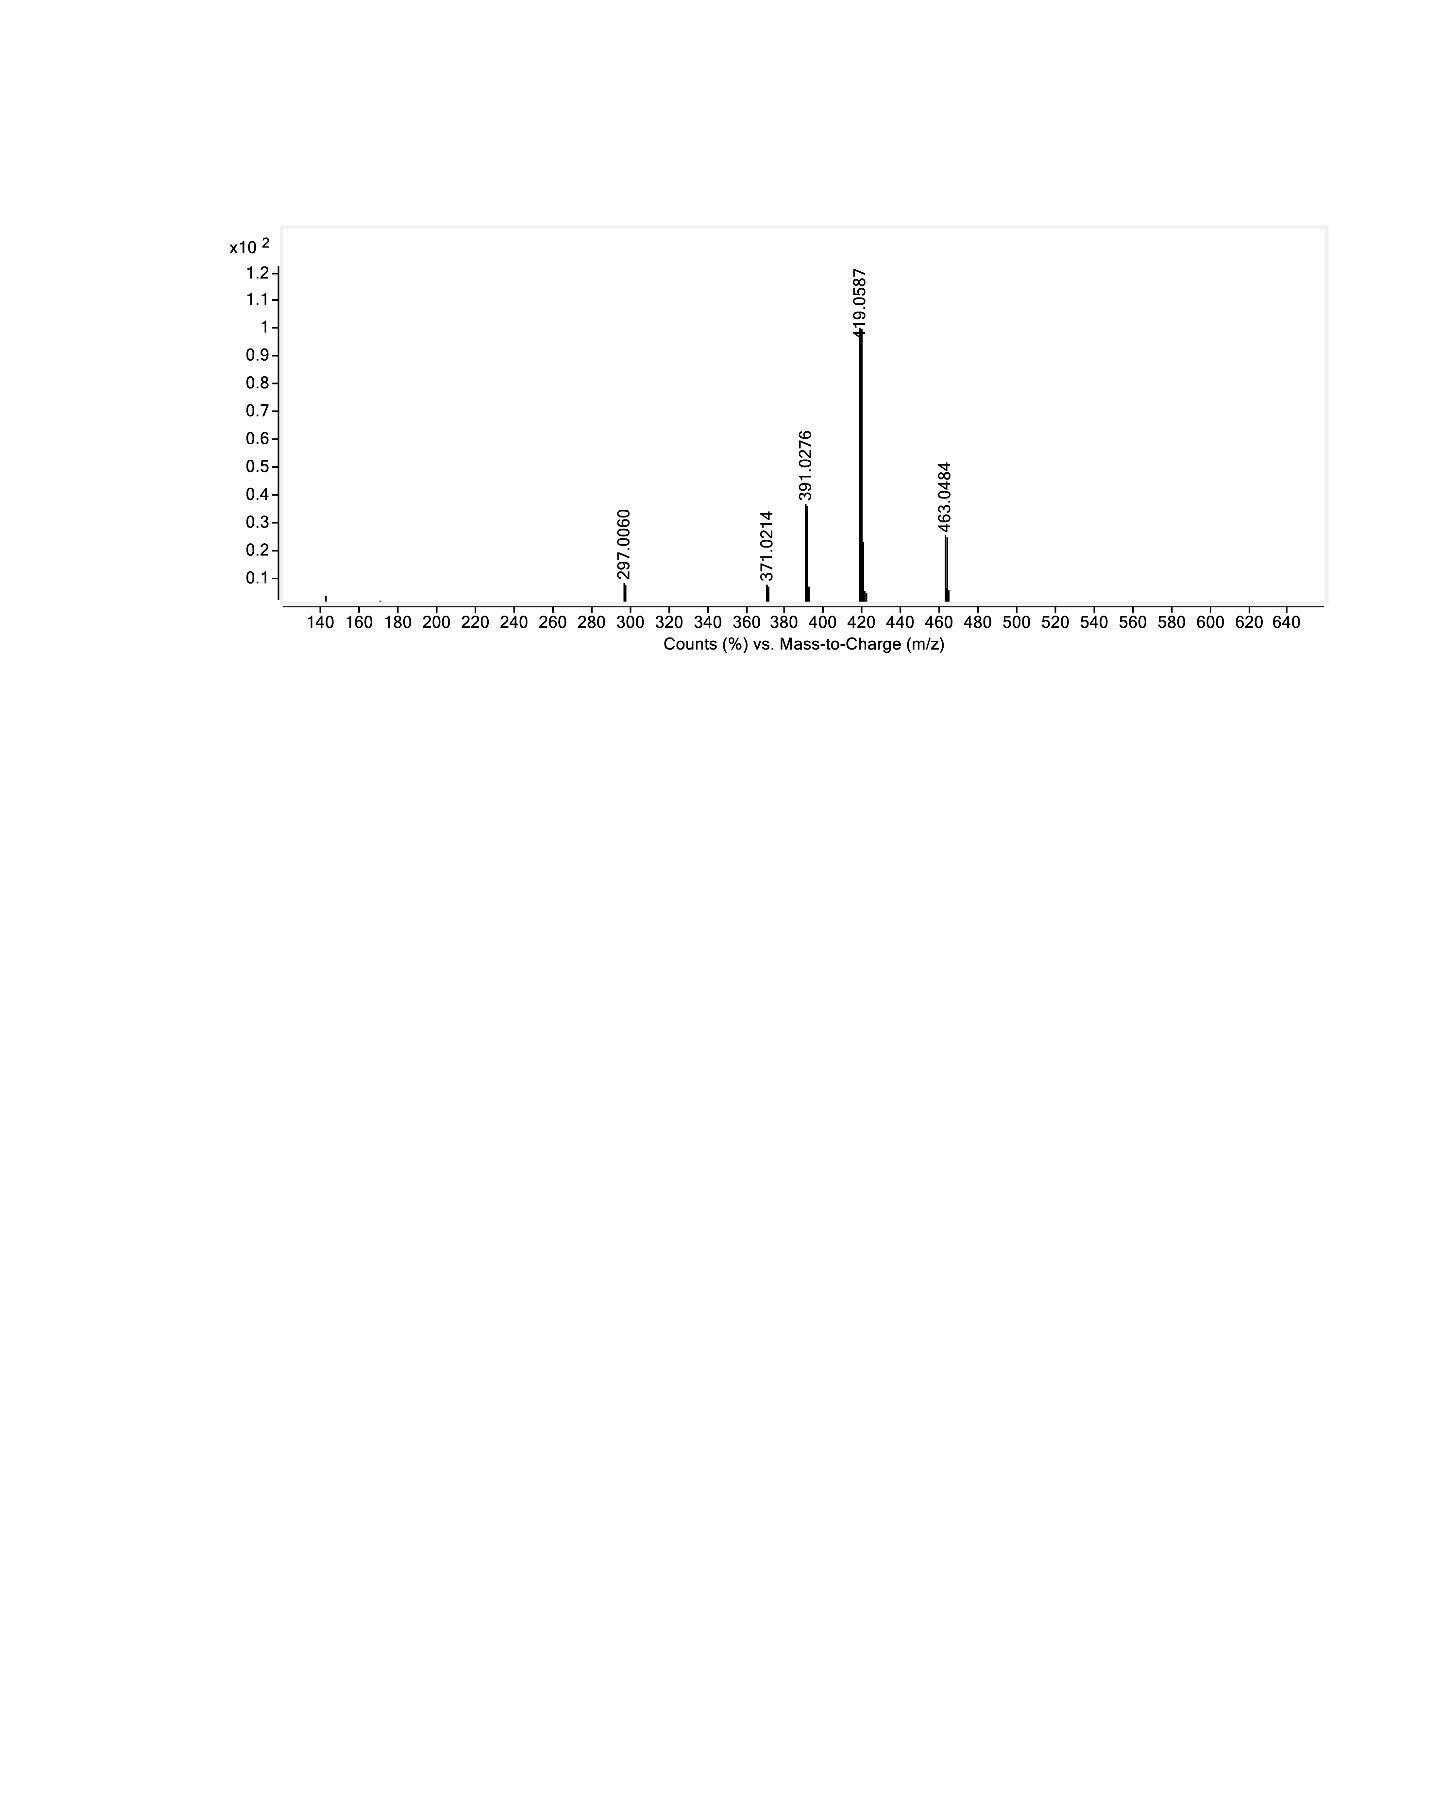


**Fig. S14** HRMS spectra of DP-7 in negative ion mode


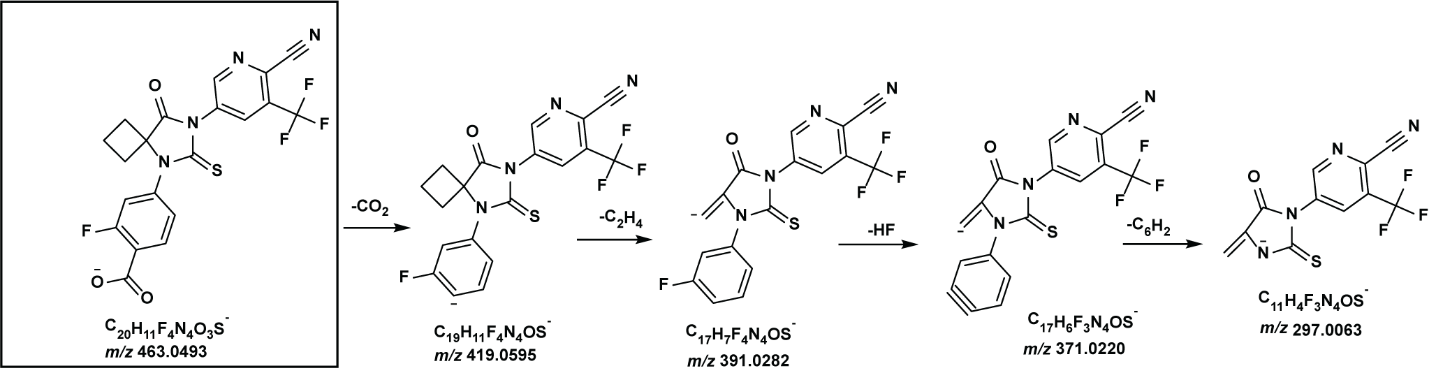


**Fig. S15** LC-MS/MS fragmentation pathway of DP-7


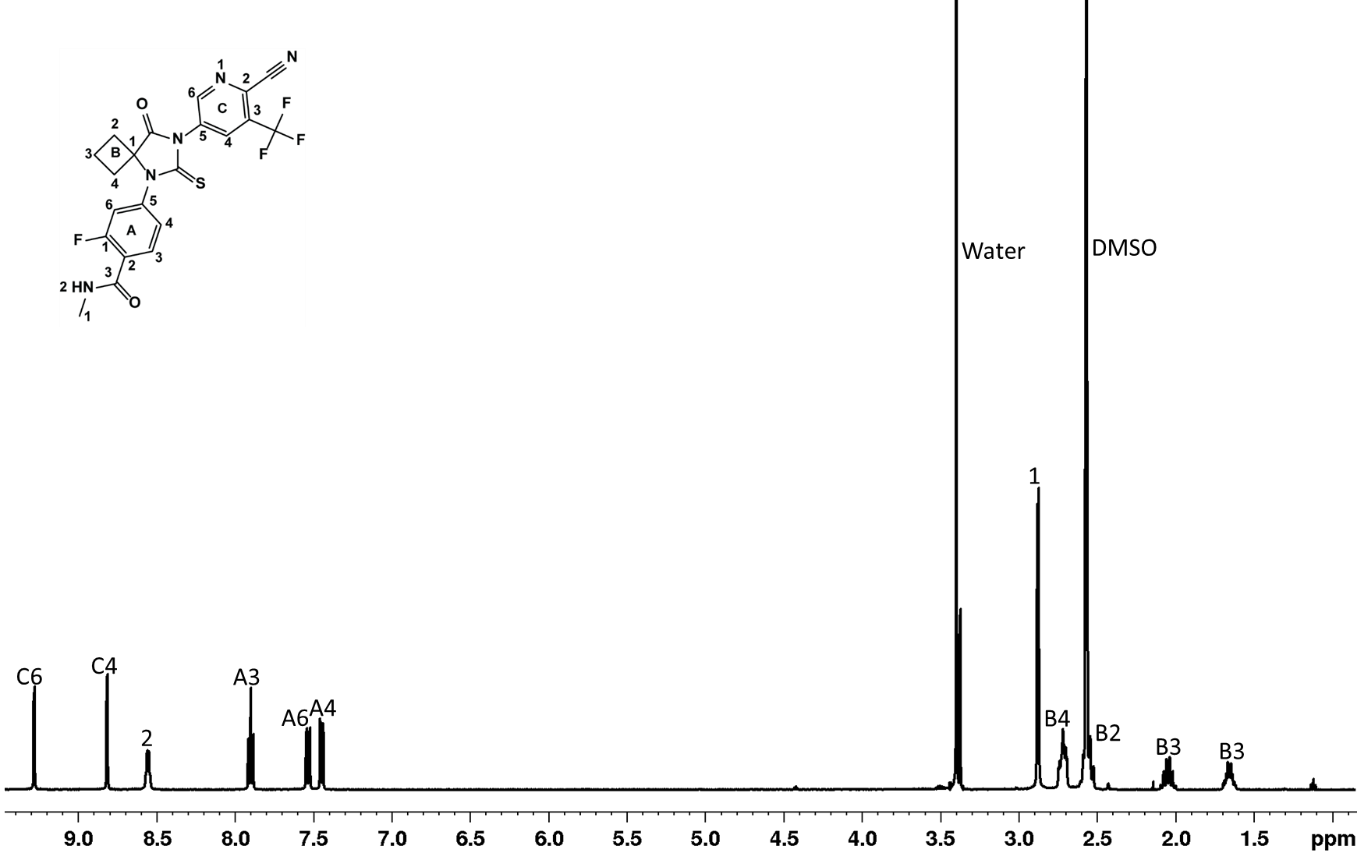


**Fig. S16** 1H NMR of apalutamide


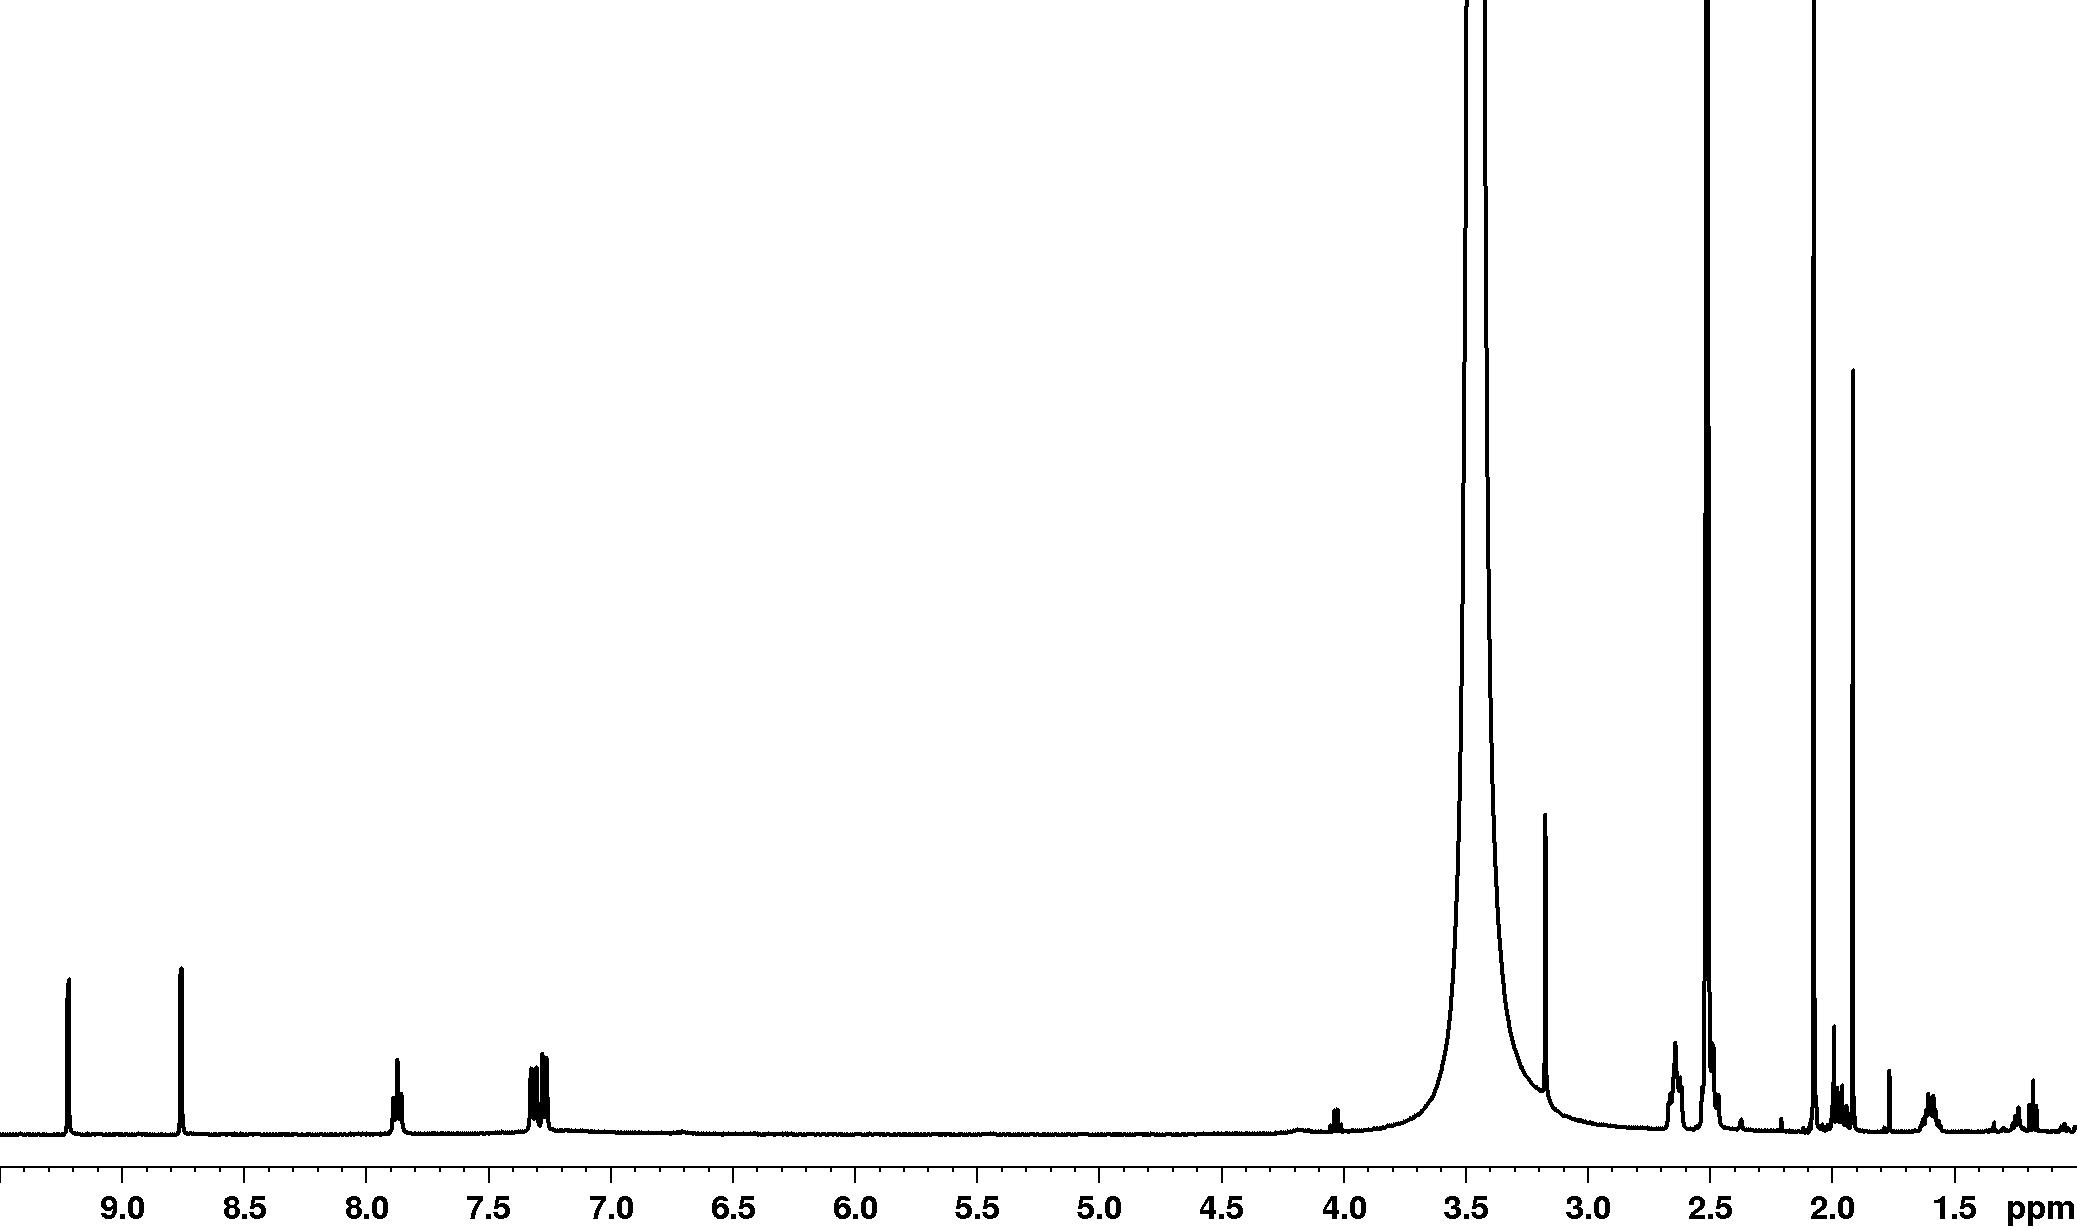


C6

C4

A3

A6

A4

B3

B3

B4

B2

#

*

**
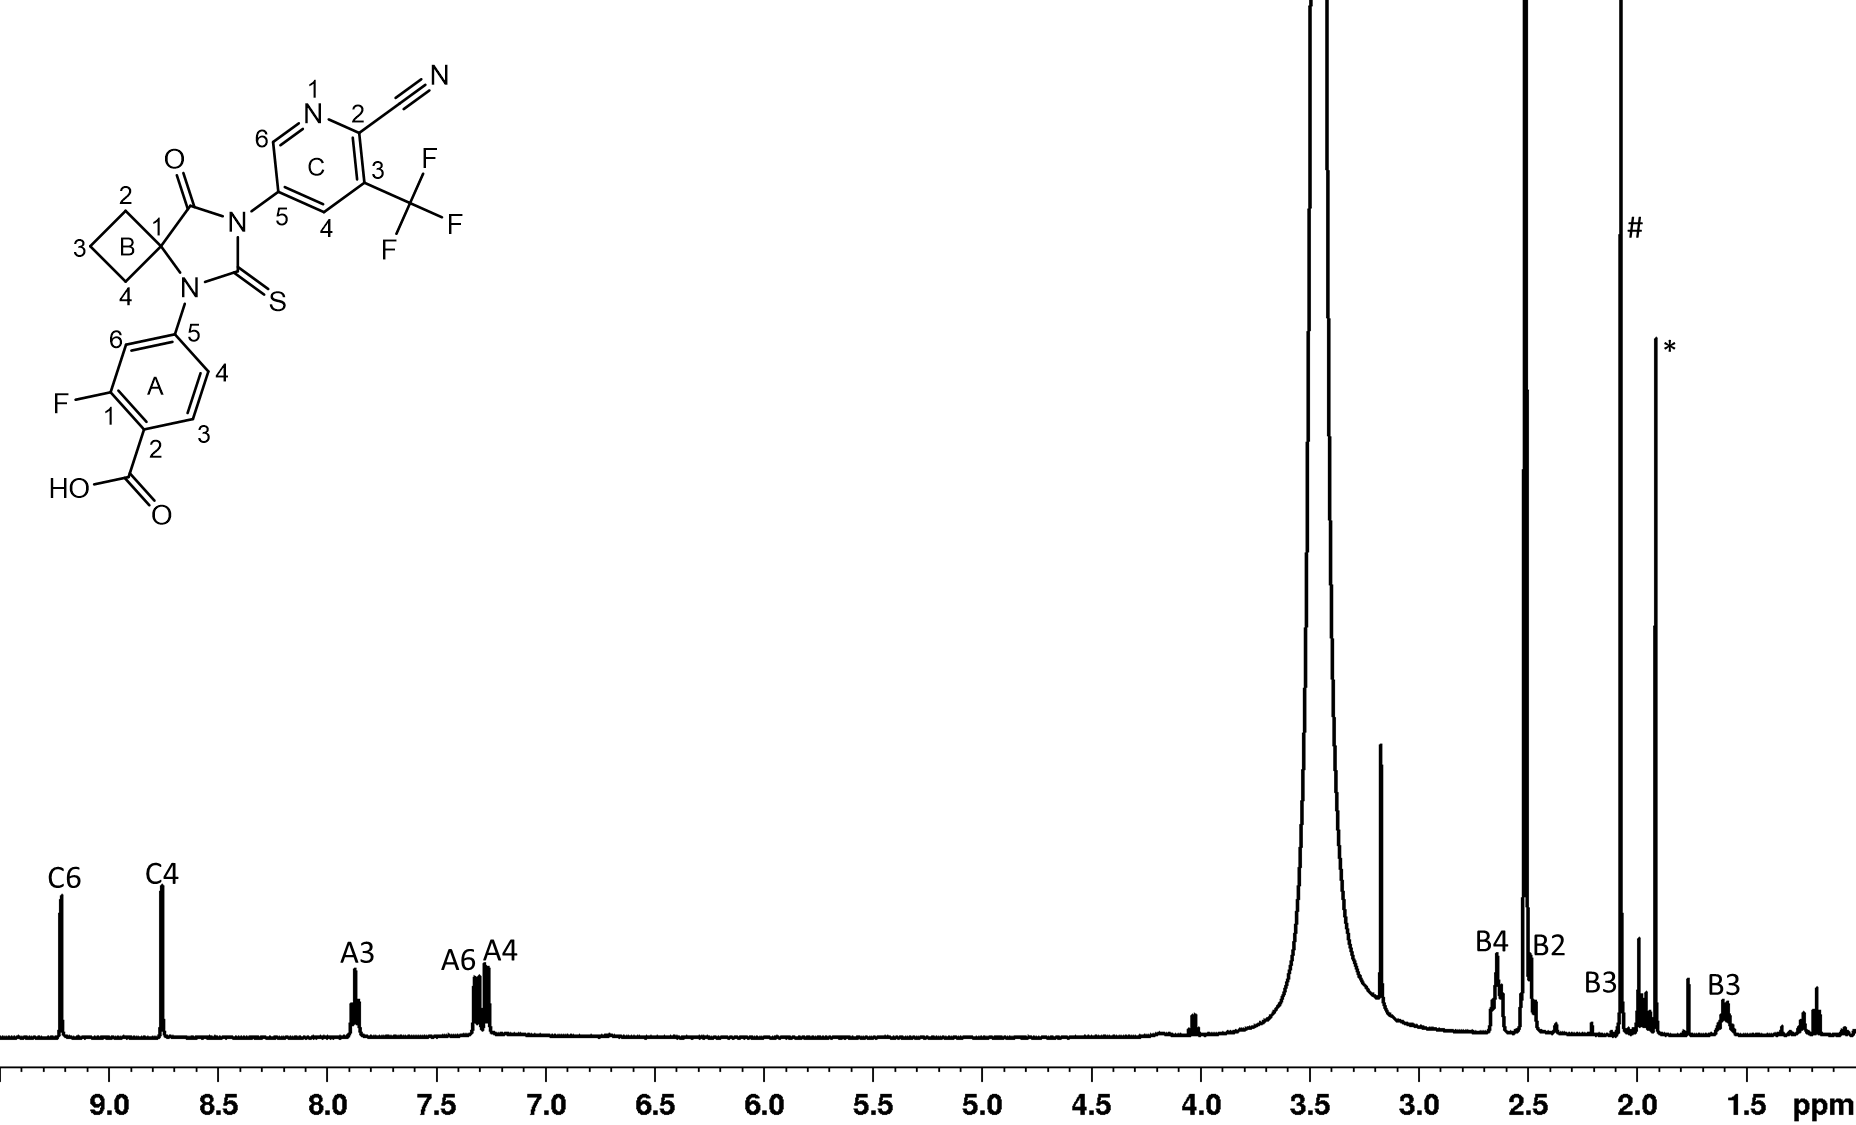
**

**Fig. S17** 1H NMR of isolated fraction of DP-7 in solvent. Peaks marked with (#) and (*) are due to residual

amount ACN and acetate buffer respectively.


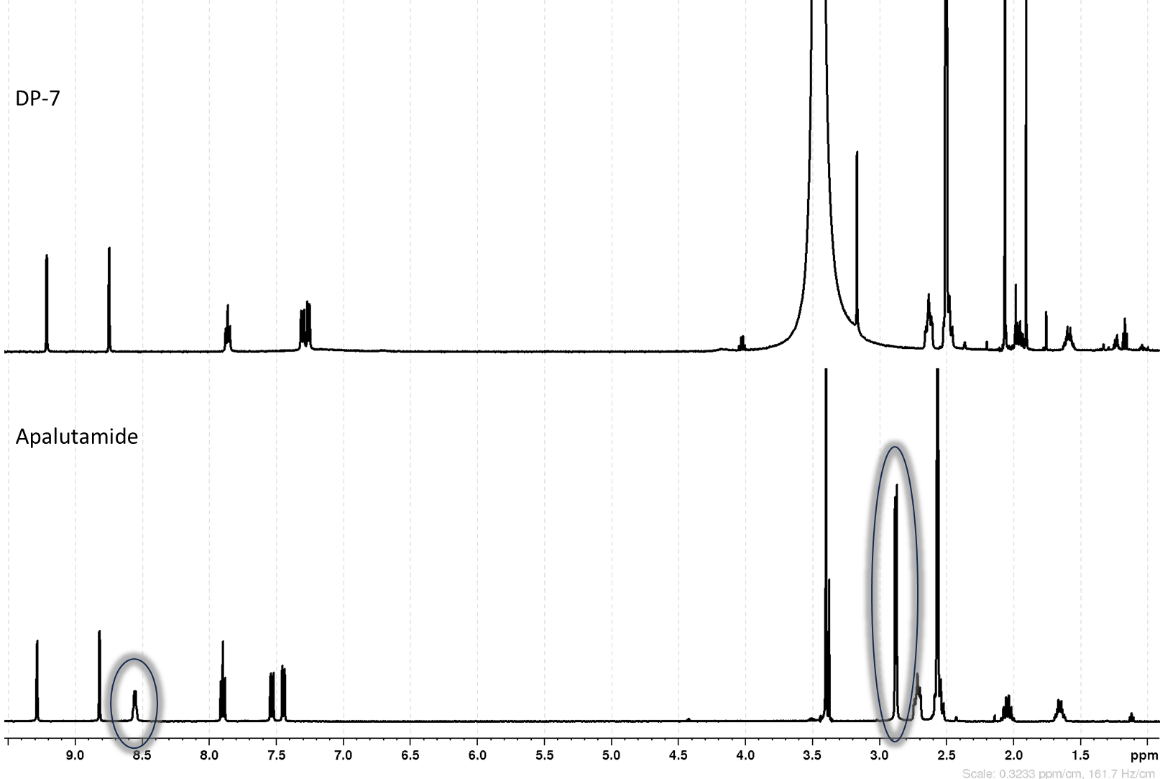


**Fig. S18** Overlay of 1H NMR of apalutamide and DP-7 highlighting the absence of peaks corresponding to NH and CH3 in DP-7.


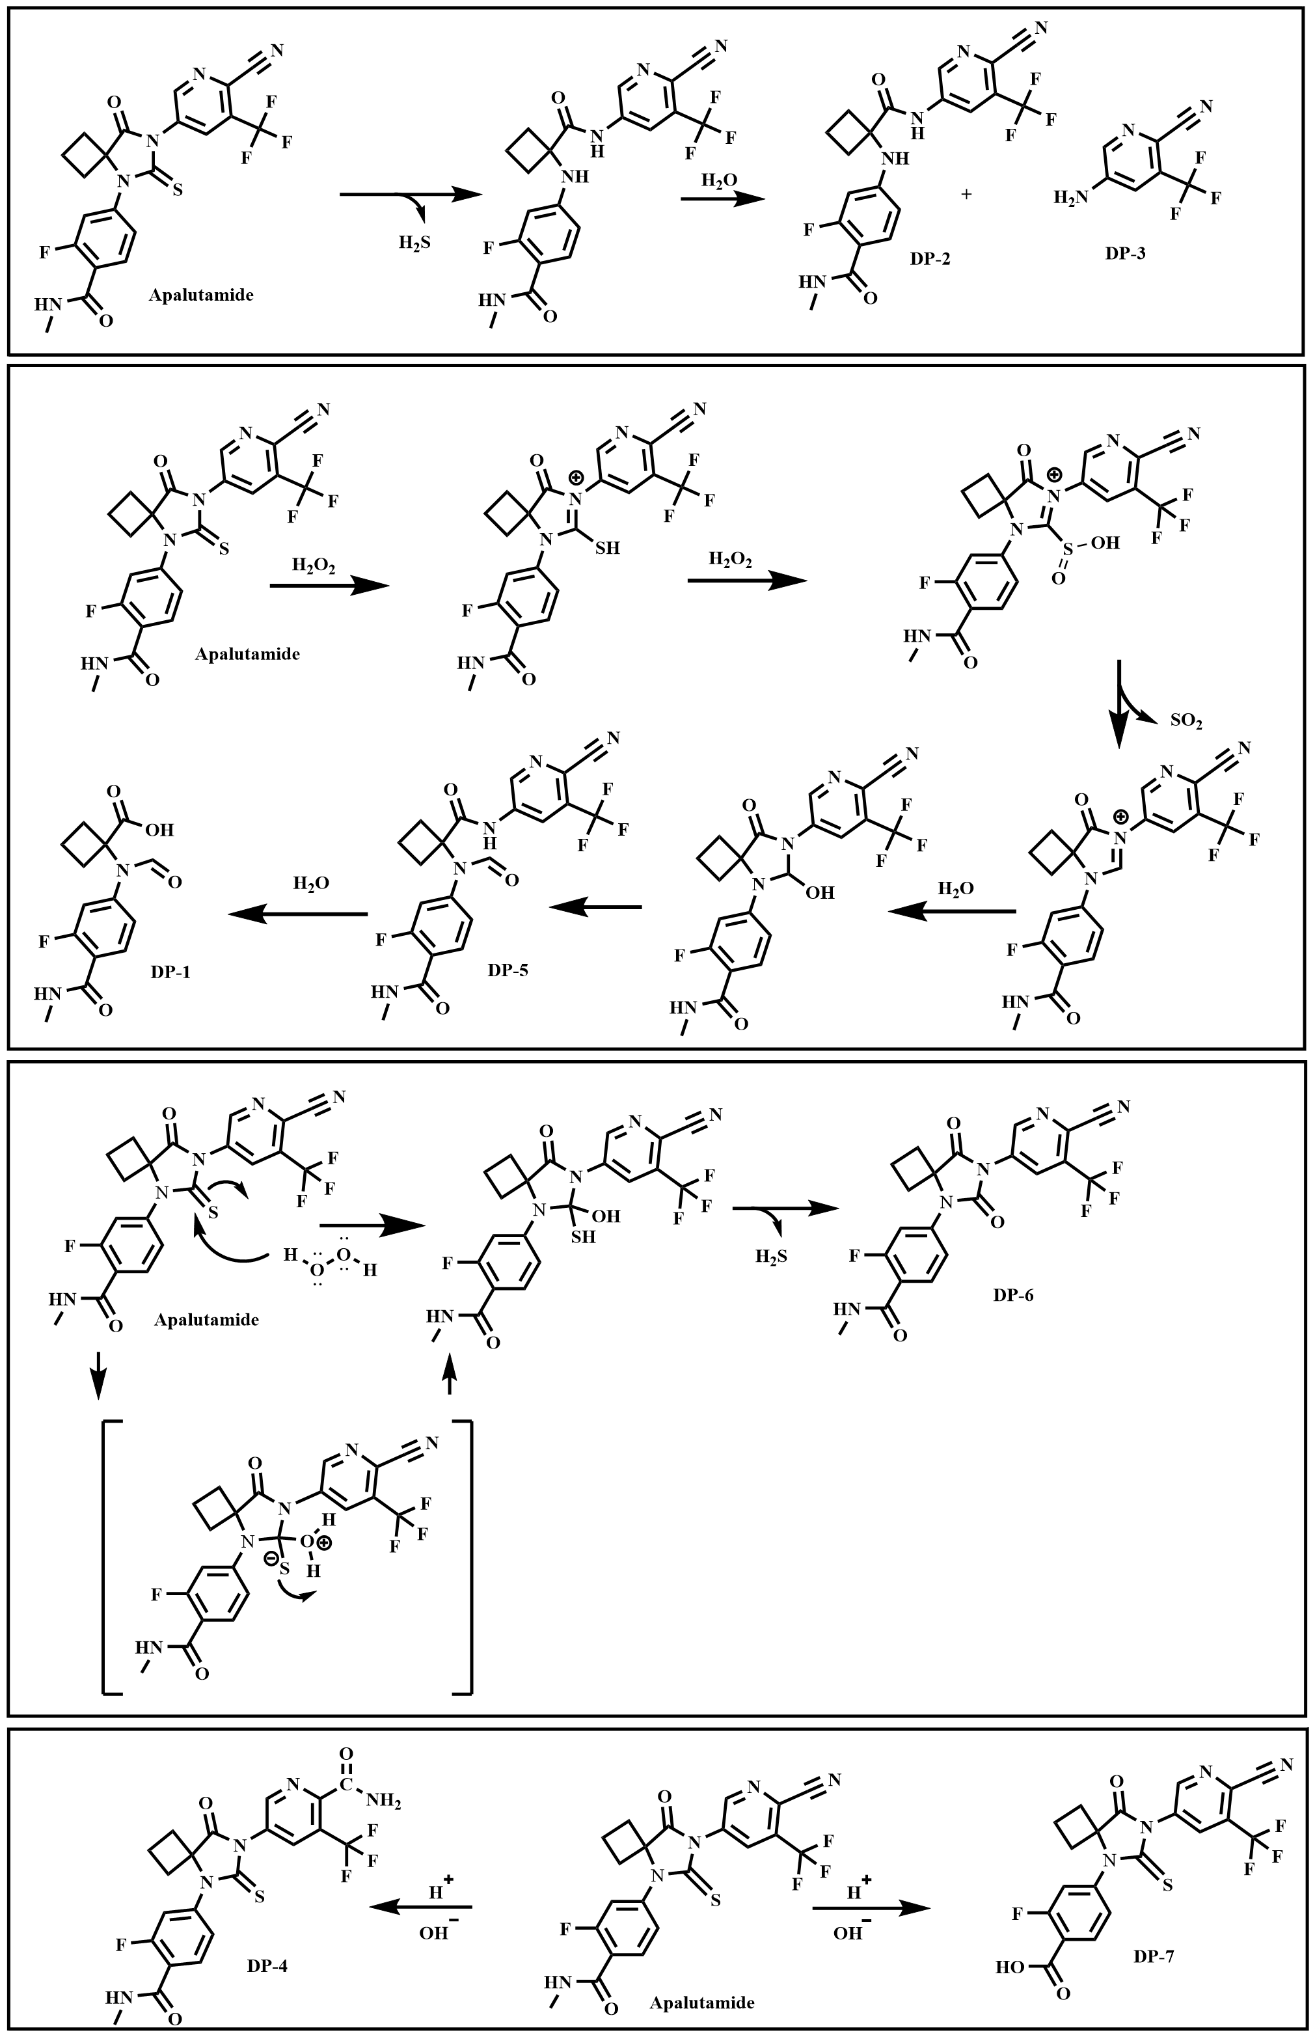


**Fig. S19** Detailed reaction pathways for the formation of all the DPs

**Table S1** LC-Q-TOF-MS data of apalutamide degradation products (DP-1 to DP-7)

| **DPs** | **Accurate mass** | **Best possible molecular formula** | **Theoretical**  **mass** | **Error in ppm** | **RDB** | **Major fragments**  **accurate mass, molecular formula, RDB, error in ppm** |
| --- | --- | --- | --- | --- | --- | --- |
| Dp-1 | 295.1082 | C14H16FN2O4+ | 295.1089 | -2.37 | 7.5 | 267.1118, C13H16FN2O3+,7.5,-2.37;  249.1025, C13H14FN2O2+, 7.5, -3.61;  239.0821, C11H12FN2O3+6.5, -2.09;  236.07, C12H11FNO3+, 7.5, -7.20;  221.1081, C12H14FN2O+, 6.5, -1.81;  208.0395, C10H7FNO3+, 7.5, -4.33;  193.0768, C10H10FN2O+, 6.5, -2.07 |
| DP-2 | 267.1141 | C13H16FN2O3+ | 371.1238 | 0.75 | 6.5 | 249.1035, C13H14FN2O2+, 7.5, 0.40;  239.0823, C11H12FN2O3+, -1.25, 6.5;  236.0714, C12H11FNO3+, 7.5, -1.27;  221.1073, C12H14FN2O+, 6.5, -5.43;  208.0401, C10H7FNO3+, 7.5, -1.44;  193.0768, C10H10FN2O+, 6.5, -2.07;  162.0347, C9H5FNO+, 7.5, -1.85;  136.0554, C8H7FN+, 5.5, -2.20;  134.0398, C8H5FN+, 6.5, -2.24;  58.0287, C2H4NO+, 1.5, 0.00; |
| DP-3 | 188.0425 | C7H5F3N3+ | 188.043 | -2.66 | 5.5 | 171.017, C7H2F3N2+, 6.5, 2.92;  168.0363, C7H4F2N3+, 6.5, -2.98;  161.0316, C6H4F3N2+, 4.5, -3.10;  141.0254, C6H3F2N2+, 5.5, -3.55;  68.9944, CF3+, 0.5, -4.35 |
| DP-4 | 496.1057 | C21H18F4N5O3S+ | 496.1061 | -0.81 | 13.5 | 479.0784, C21H15F4N4O3S+, 14.5,-2.50;  468.0748, C19H14F4N5O3S+, 13.5, 0.00;  451.0483, C19H11F4N4O3S+, 14.5, 0.00;  423.0526, C18H11F4N4O2S+, 13.5,  -1.65;  423.0887, C19H15F4N4OS+, 12.5, -2.36;  392.0466, C18H10F4N3OS+, 13.5, -2.30;  58.0288, C2H4NO+, 1.5, 1.72; |
| DP-5 | 464.1326 | C21H18F4N5O3+ | 464.134 | -3.02 | 13.5 | 433.0901, C20H13F4N4O3+, 14.5,-3.93;  405.0956, C19H13F4N4O2+, 13.5, -3.21;  377.065, C17H9F4N4O2+, 13.5, -1.59;  277.0971, C14H14FN2O3+, 8.5, -4.33;  249.1024, C13H14FN2O2+, 7.5, -4.01;  221.1075, C12H14FN2O+, 6.5,-4.52;  162.0337, C9H5FNO+, 7.5, -8.02;  138.0342, C7H5FNO+, 5.5, -5.80;  58.0286, C2H4NO+, 1.5, -1.72; |
| DP-6 | 462.1176 | C21H16F4N5O3+ | 462.1184 | -1.73 | 14.5 | 434.0858, C19H12F4N5O3+, 14.5, -2.99;  431.0745, C20H11F4N4O3+, 15.5, -3.94;  416.0751, C19H10F4N5O2+, 15.5, -3.36;  403.0434, C18H7F4N4O3+, 15.5,-3.72;  377.064, C17H9F4N4O2+, 13.5, -4.24;  249.1024, C13H14FN2O2+, 7.5, -4.01;  221.1076, C12H14FN2O+, 6.5, -4.07;  193.0764, C10H10FN2O+, 6.5, -4.14;  162.034, C9H5FNO+, 7.5, -6.17;  136.055, C8H7FN+, 5.5,-5.14;  58.0284, C2H4NO+, 1.5, -5.17; |
| DP-7 | 463.0484 | C20H11F4N4O3S- | 463.0493 | -1.94 | 15.5 | 419.0587, C19H11F4N4OS-, 14.5, -1.91;  391.0276, C17H7F4N4OS-, 14.5, -1.53;  371.0214, C17H6F3N4OS-, 15.5, -1.62;  297.006, C11H4F3N4OS-, 10.5, -1.01 |

Table S2 Predicted degradation products by using Zeneth sofware

| **Acidic hydrolysis** | | | | | | | |
| --- | --- | --- | --- | --- | --- | --- | --- |
| Sr no | Structure | Name | Parent | Score | Transformation name | Transformation group | Condition trigger |
|  | 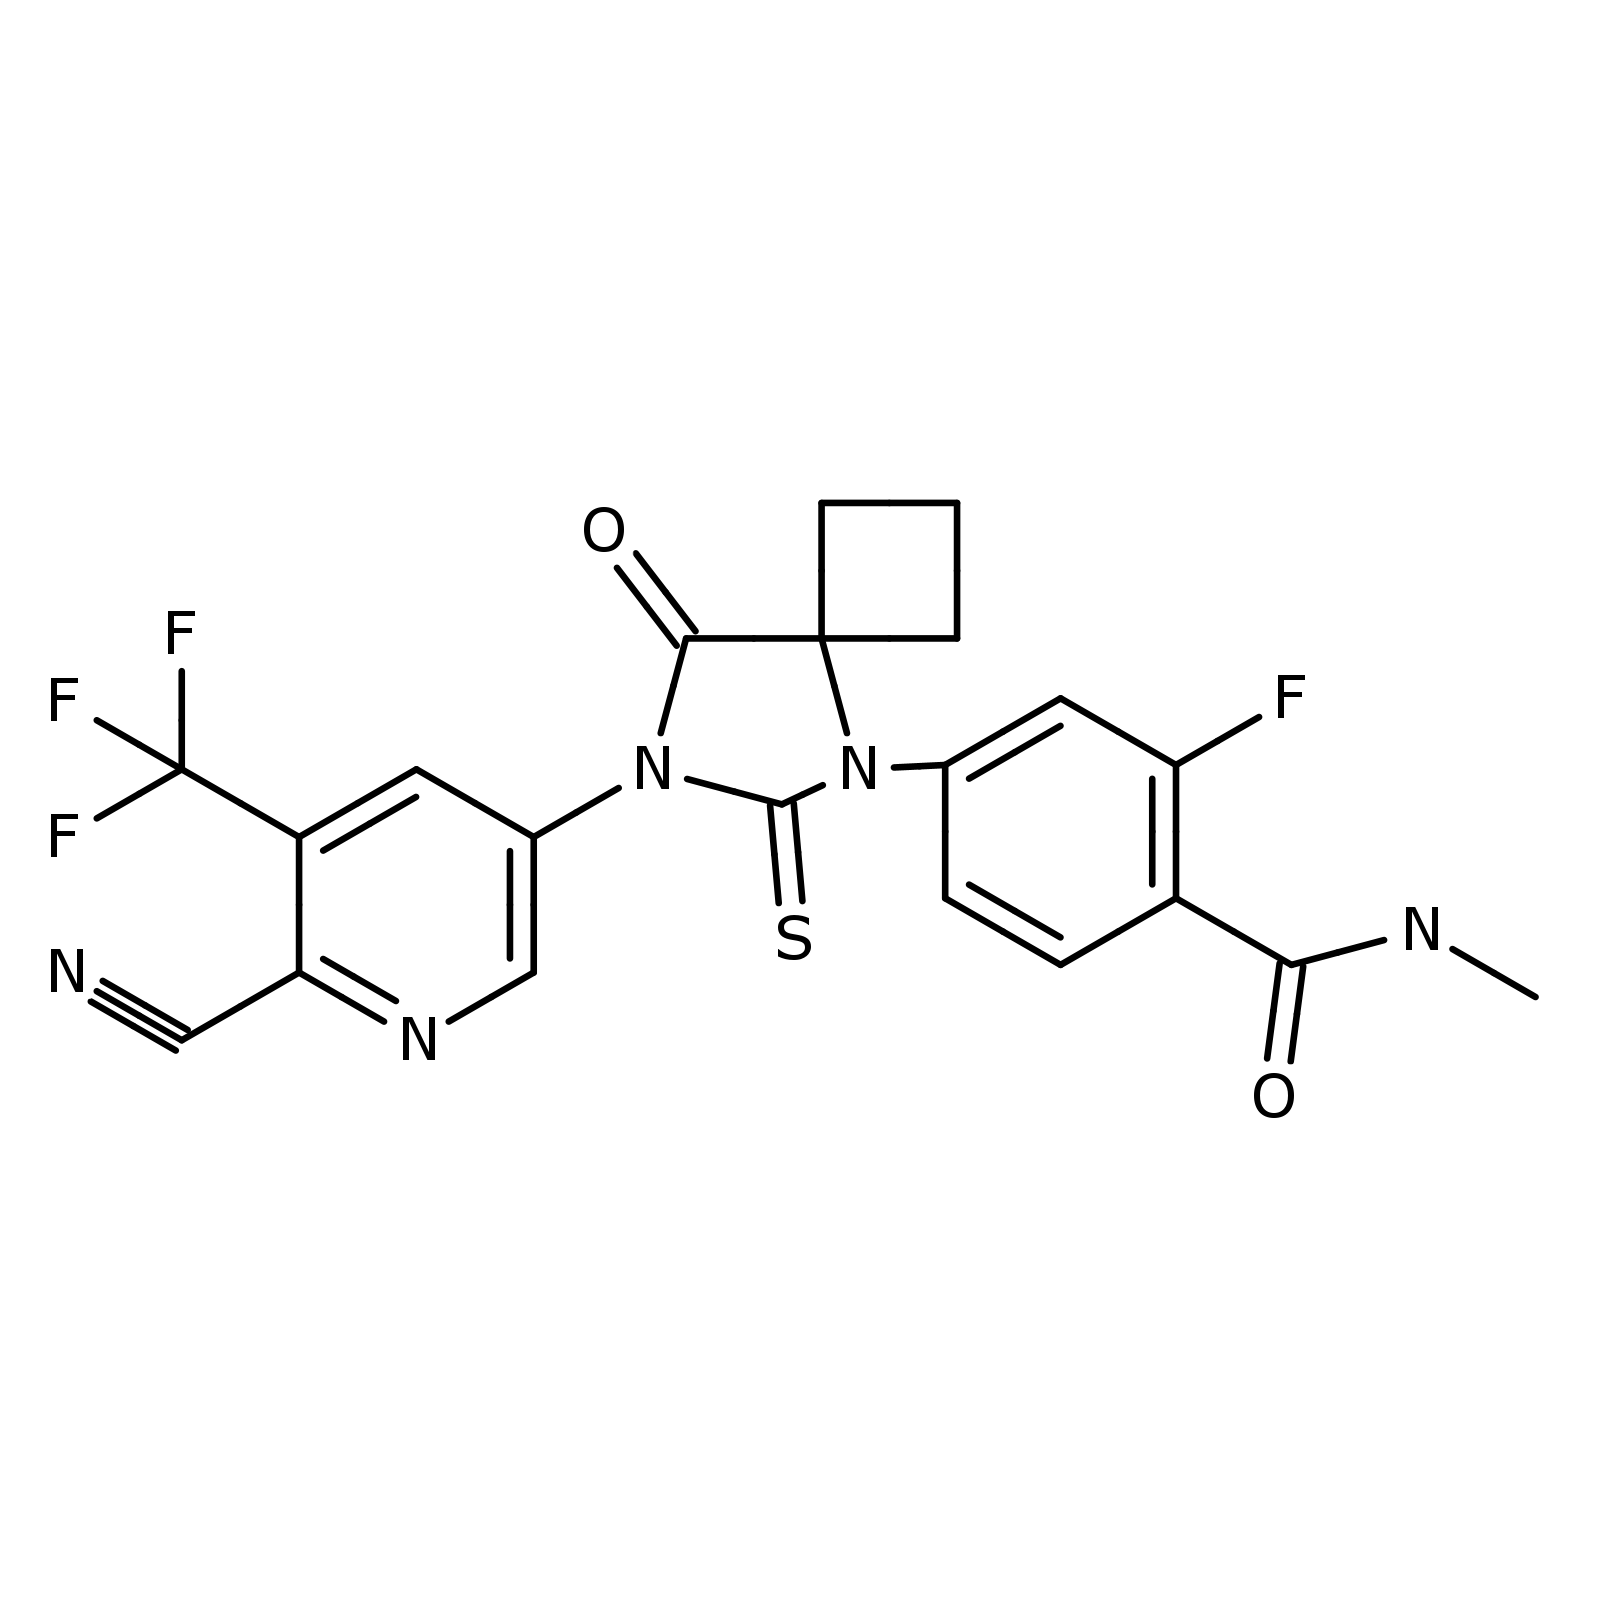 | Query |  |  |  |  |  |
| 1 | 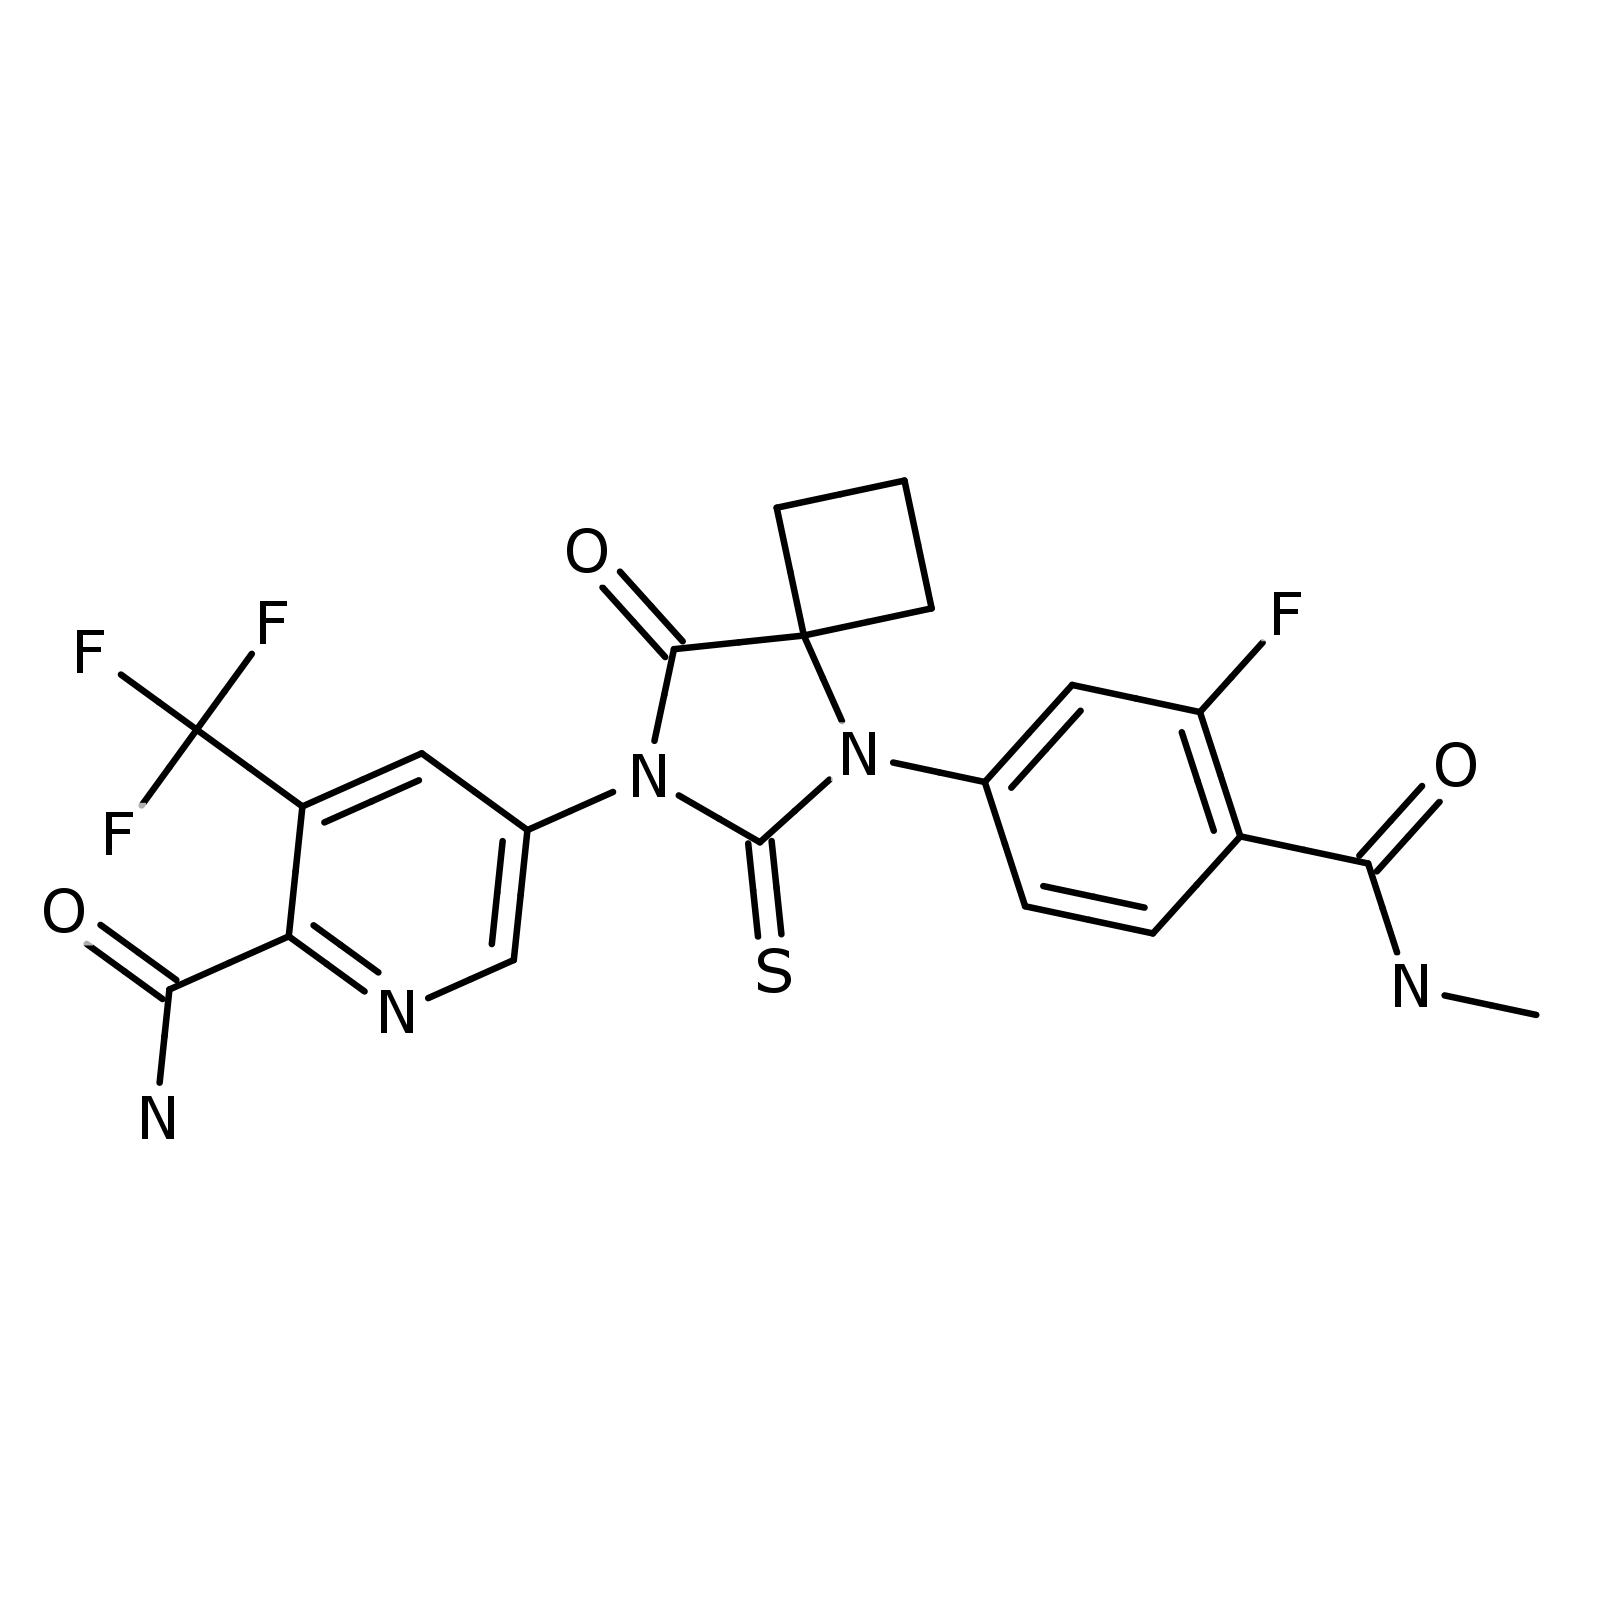 | D1 | Q | 900 | Hydration of nitrile | Condensations and additions | Water; pH |
| 2 | 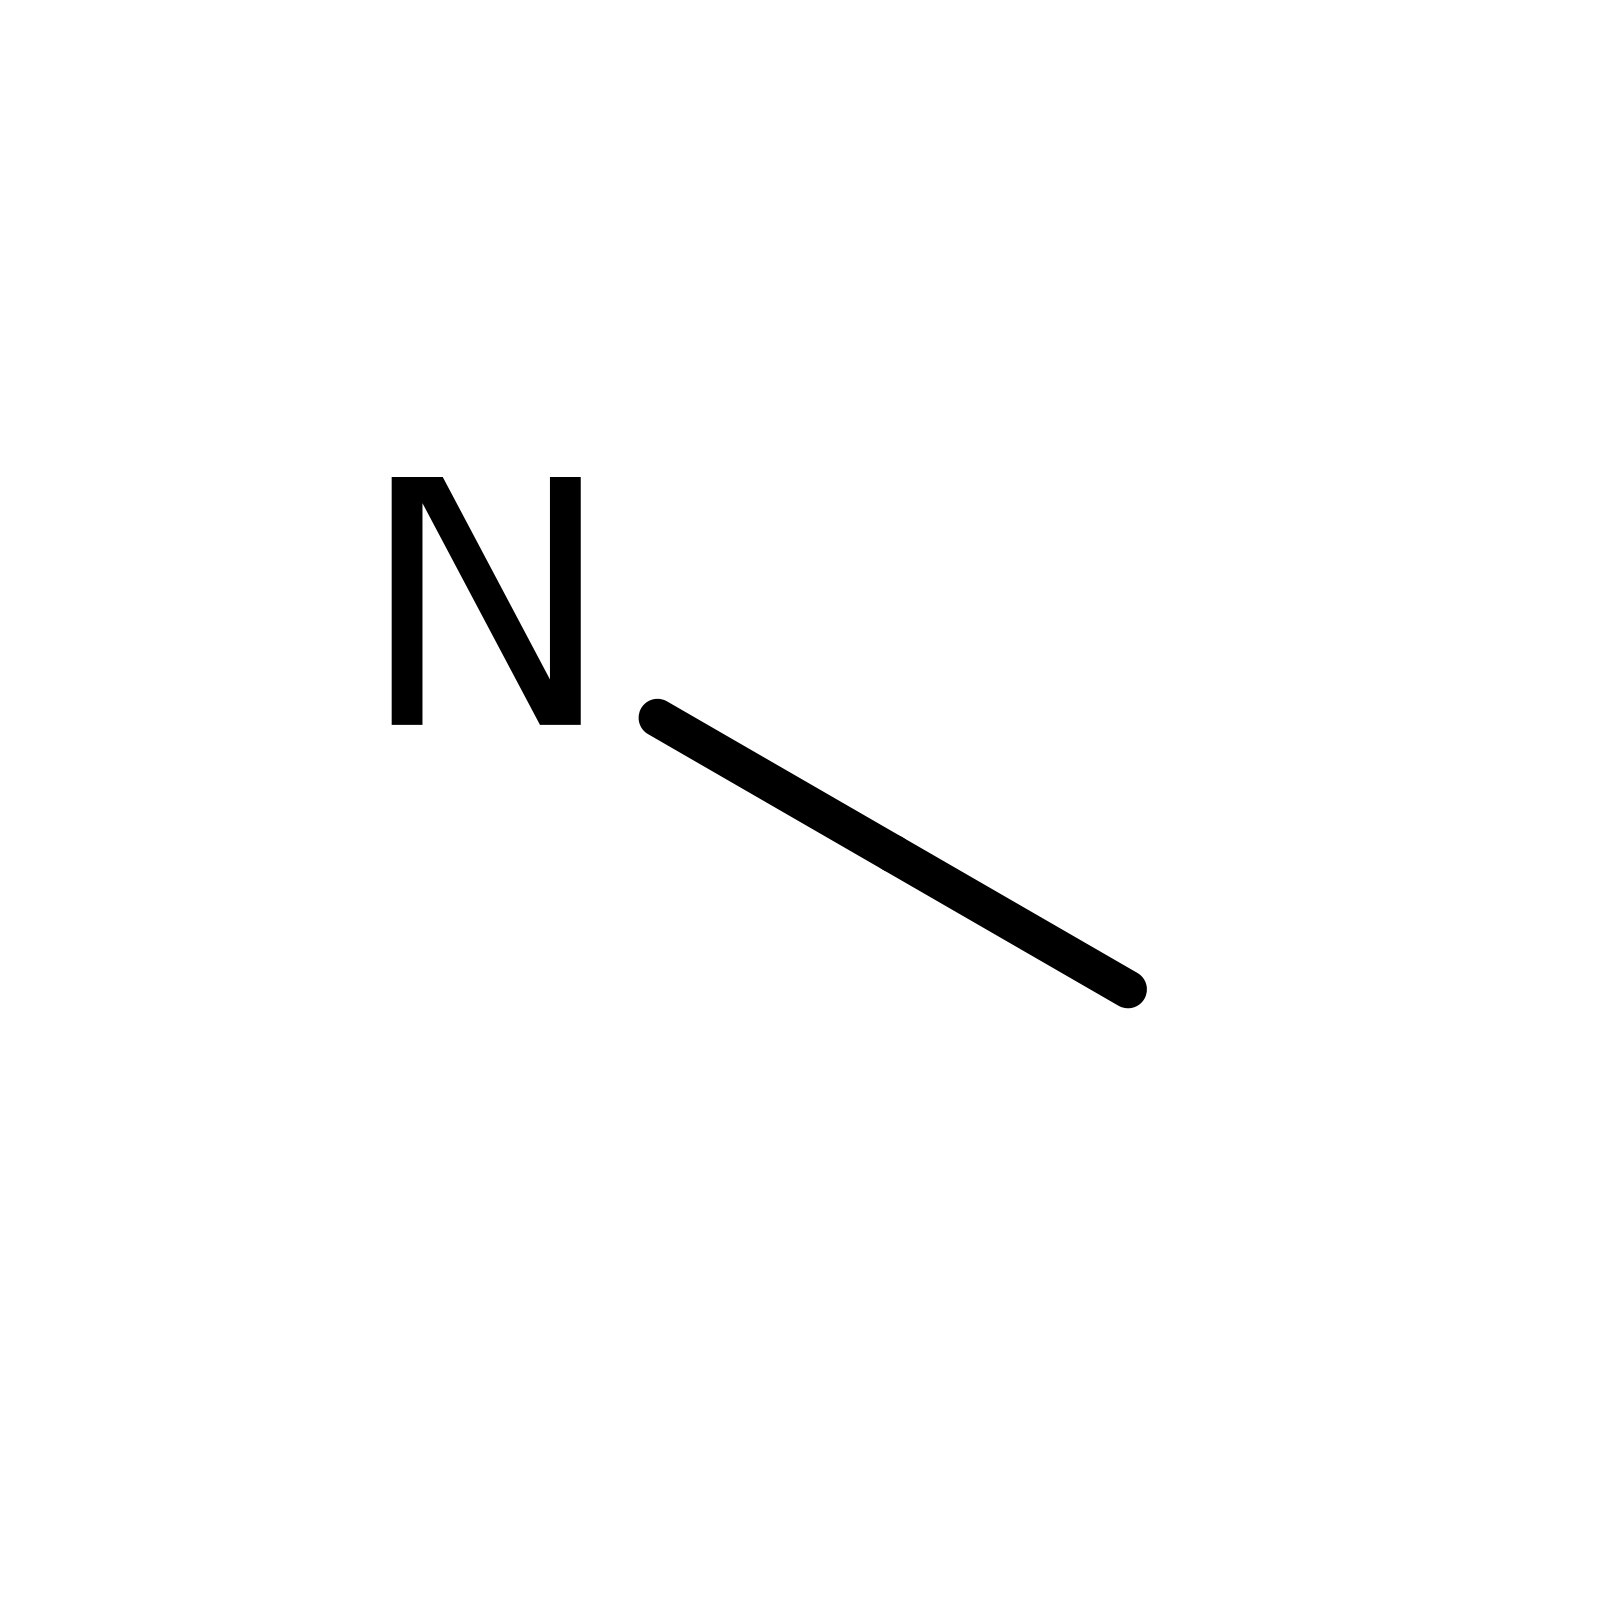 | D2 | Q | 700 | Hydrolysis of amide | Hydrolyses | Water; pH |
| 3 | 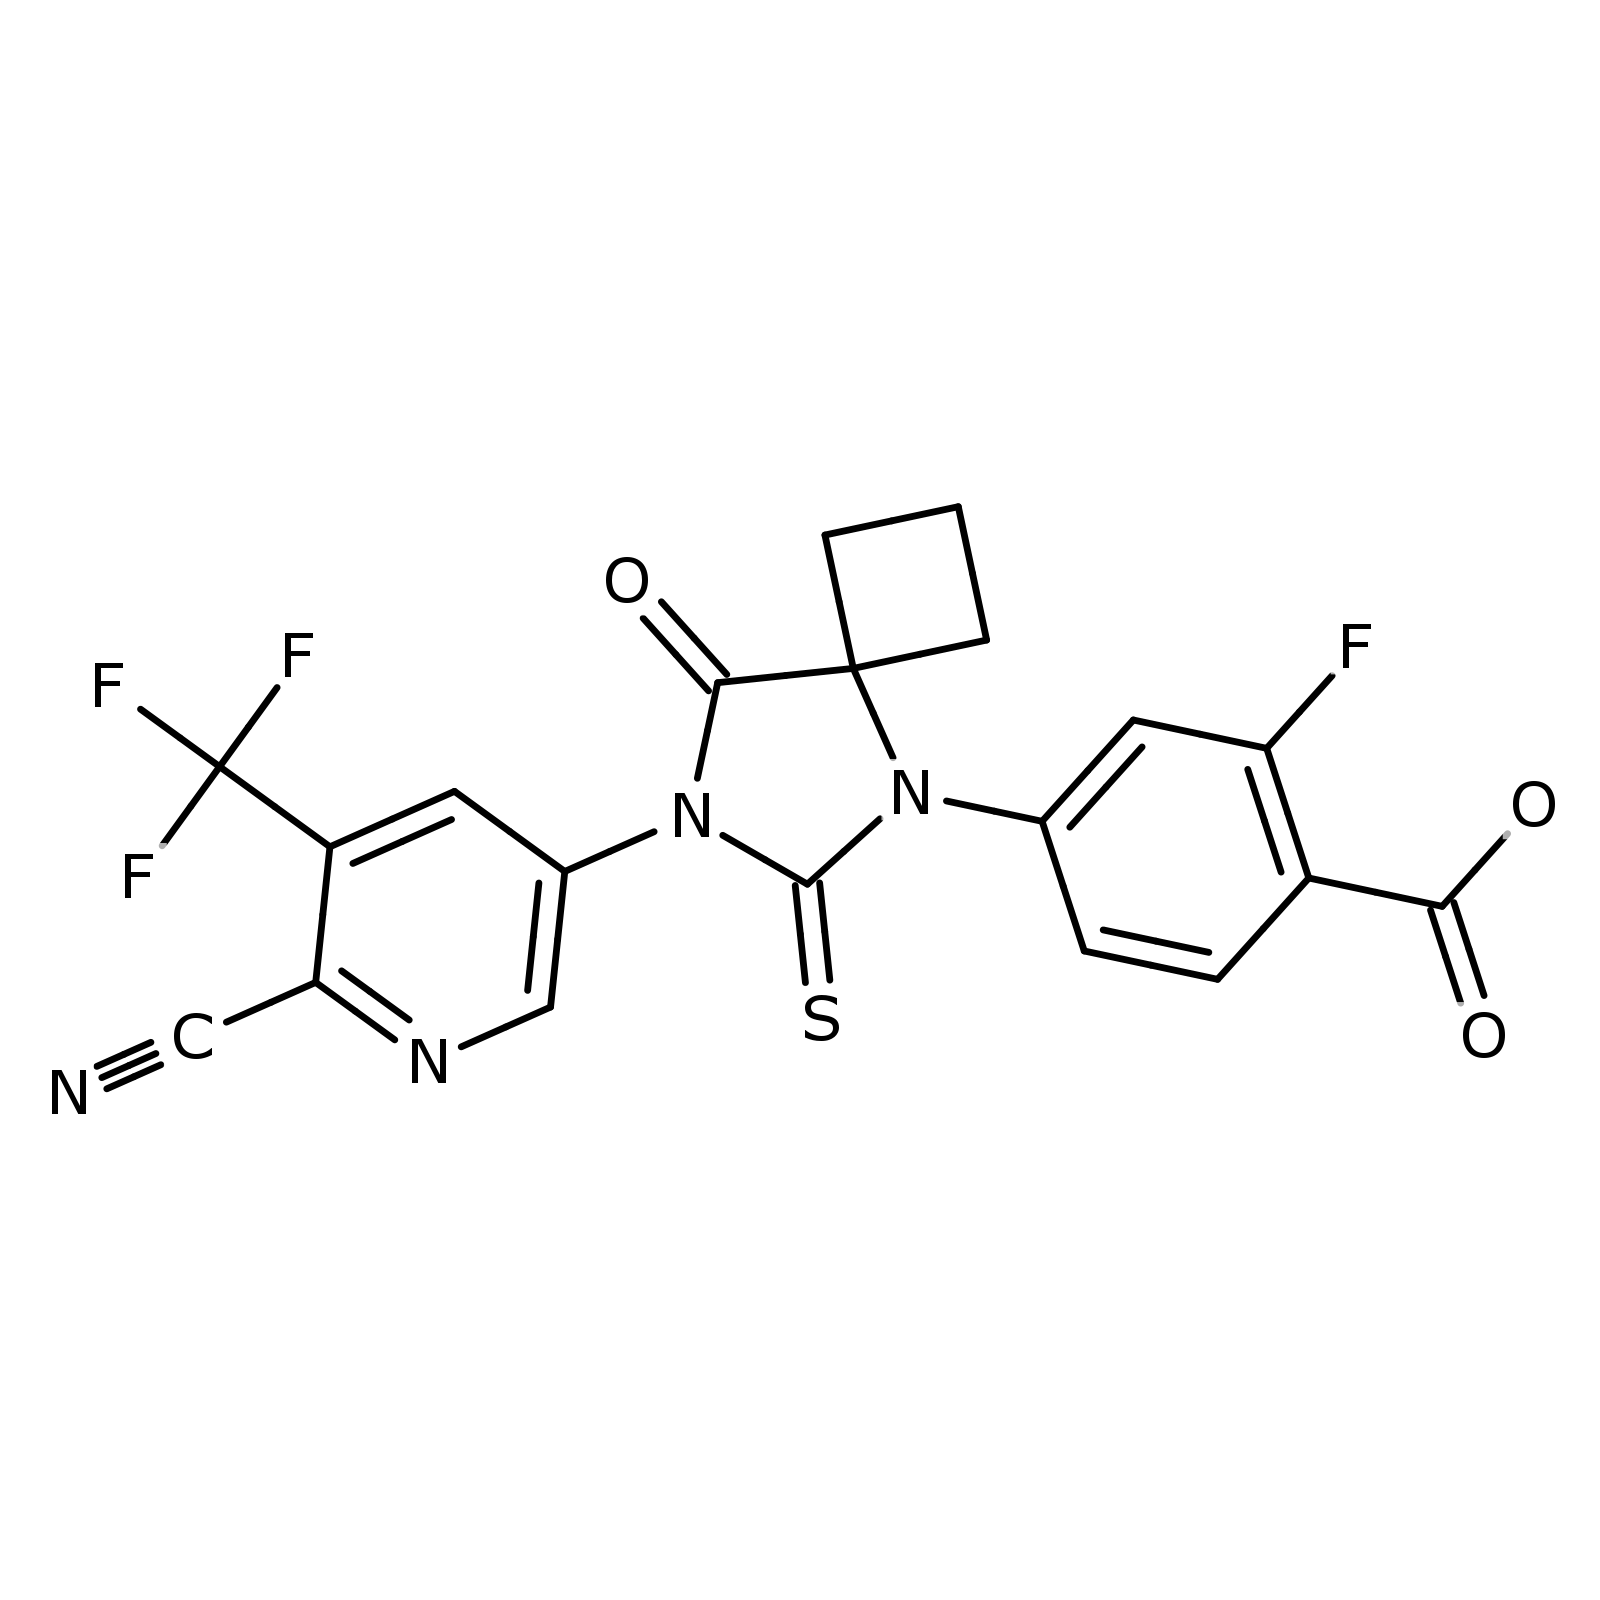 | D3 | Q | 700 | Hydrolysis of amide | Hydrolyses | Water; pH |
| 4 | 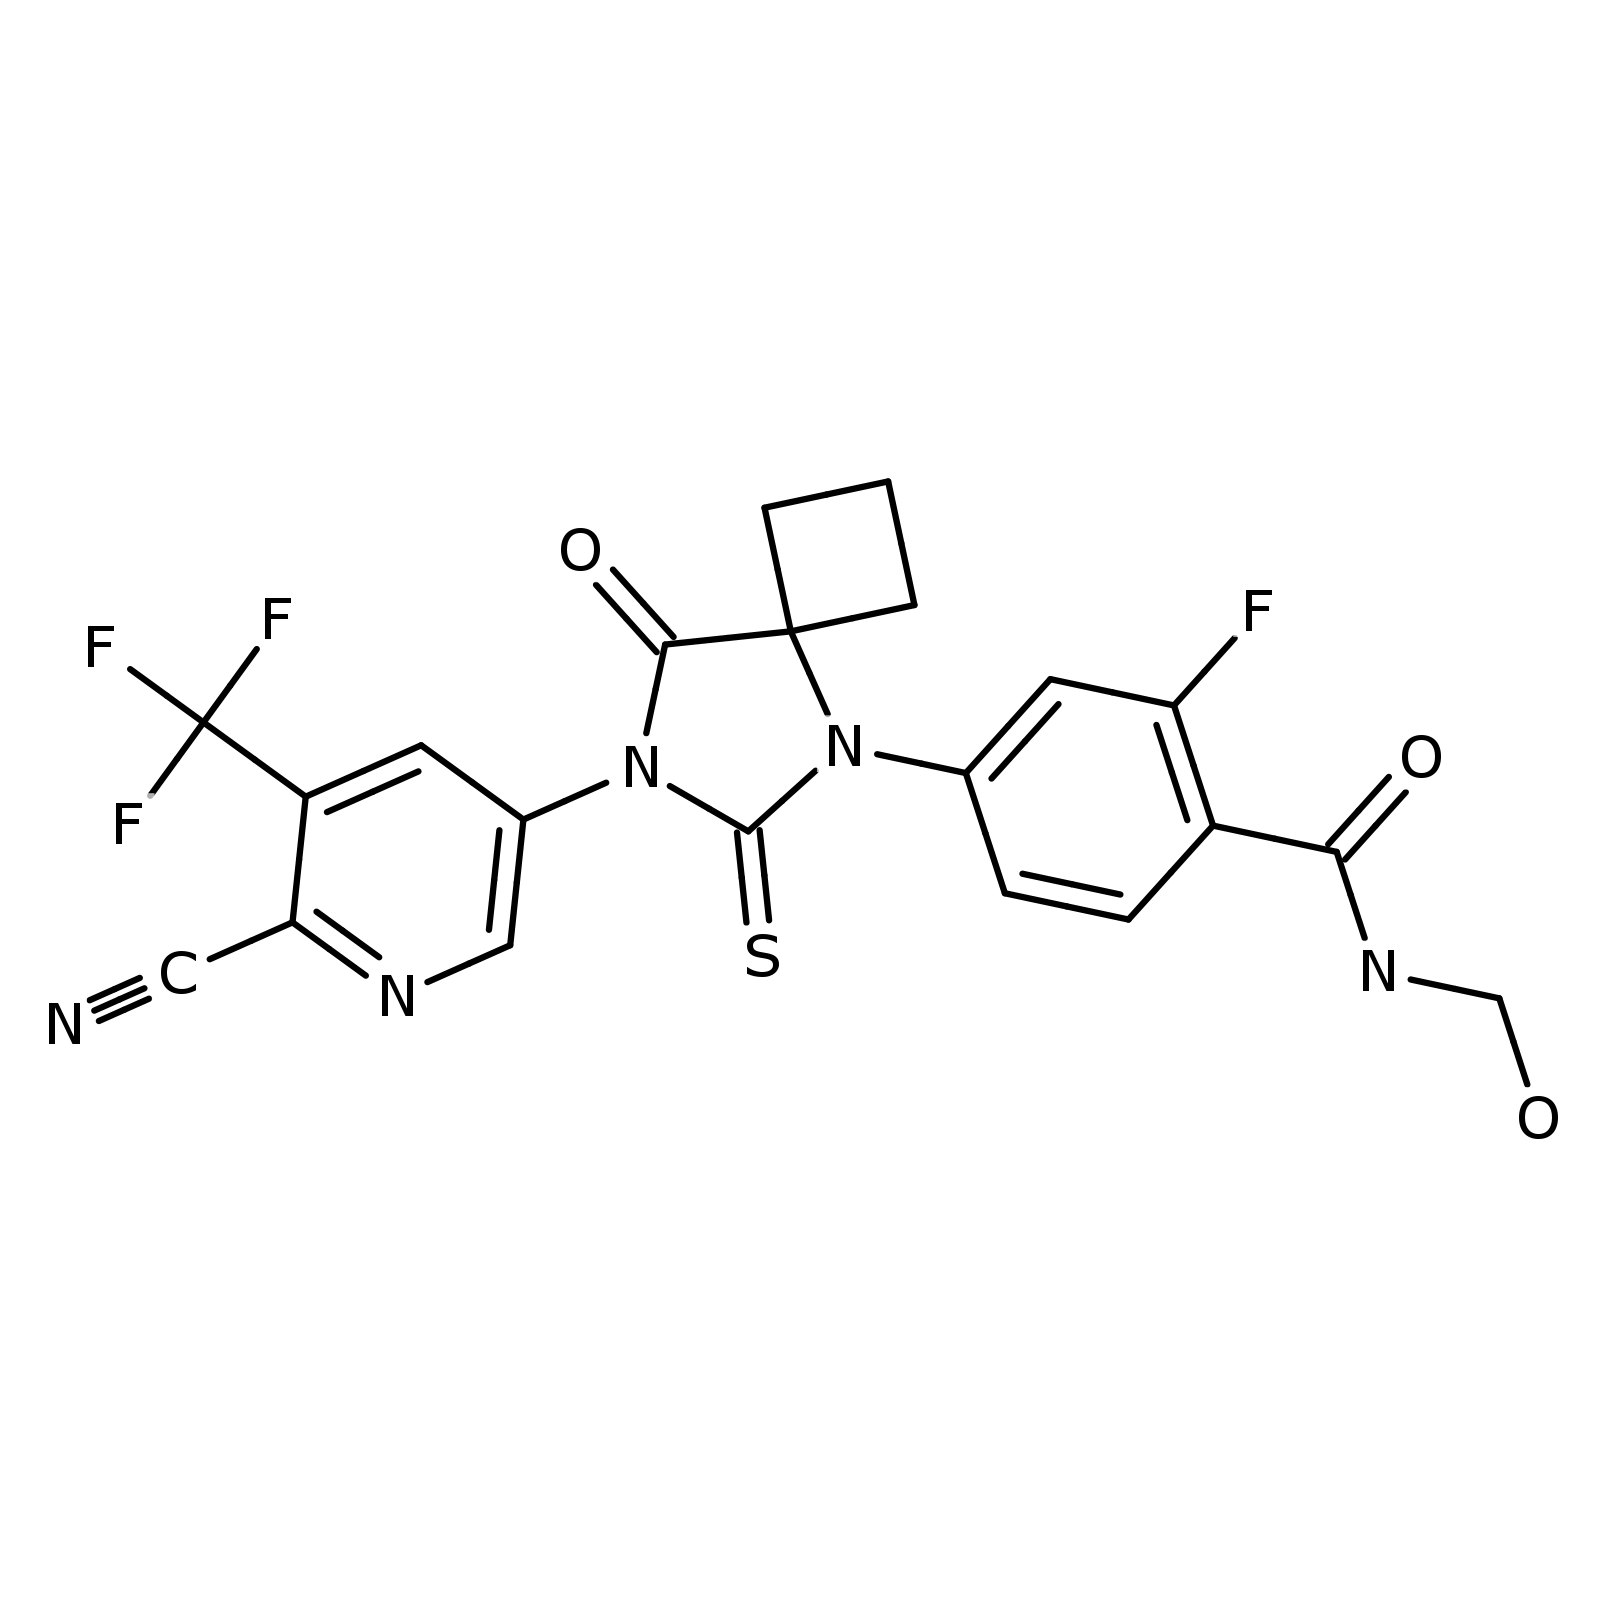 | D4 | Q | 700 | Oxidation of N-alkyl amide to hemiamidal | Oxidations | Oxygen; Radical or Light |
| 5 | 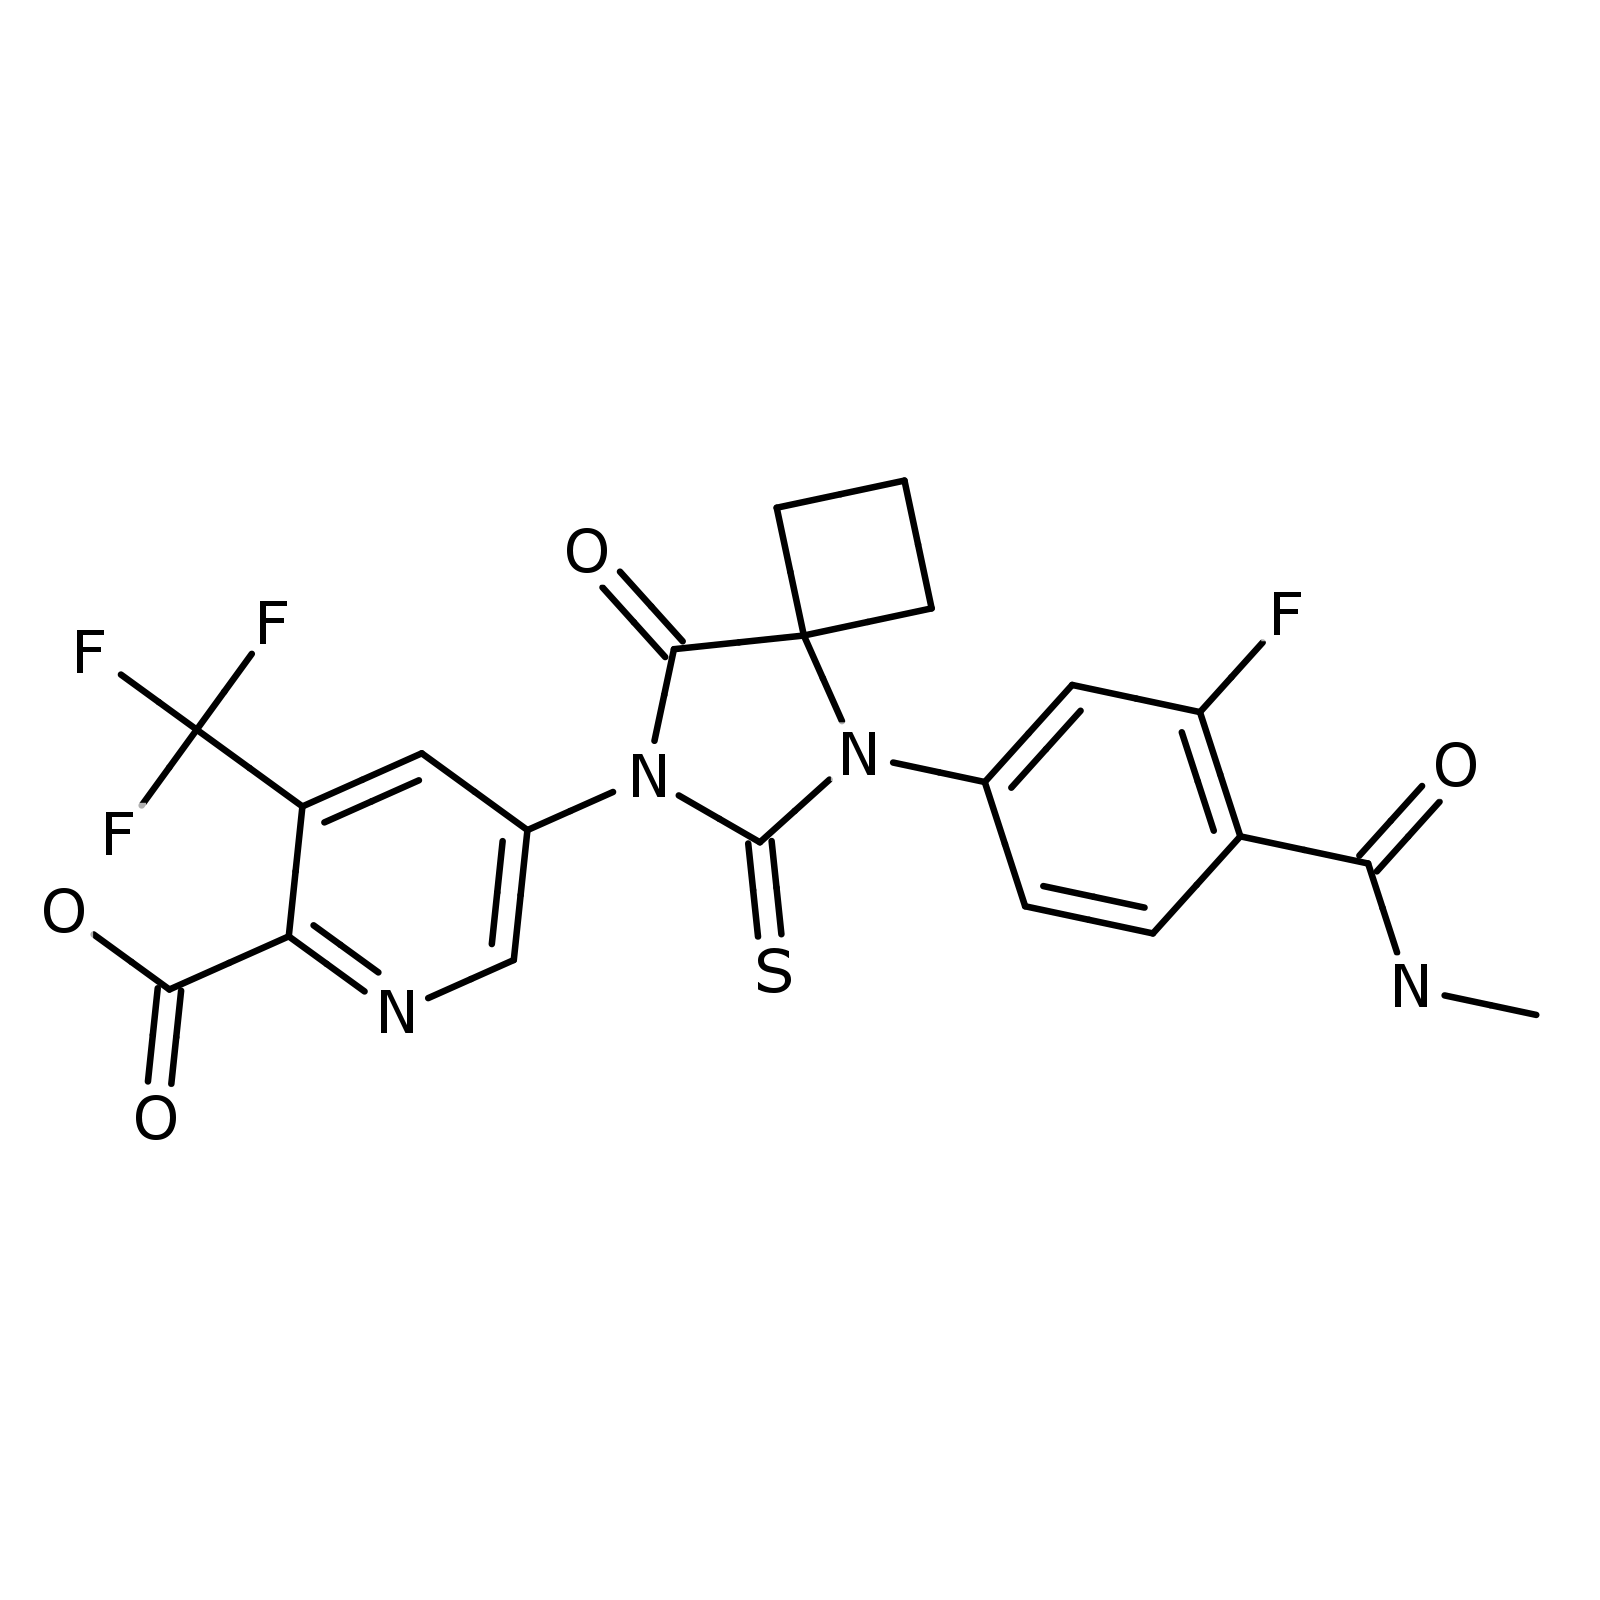 | D5 | D1 | 630 | Hydrolysis of amide | Hydrolyses | Water; pH |
| 6 | 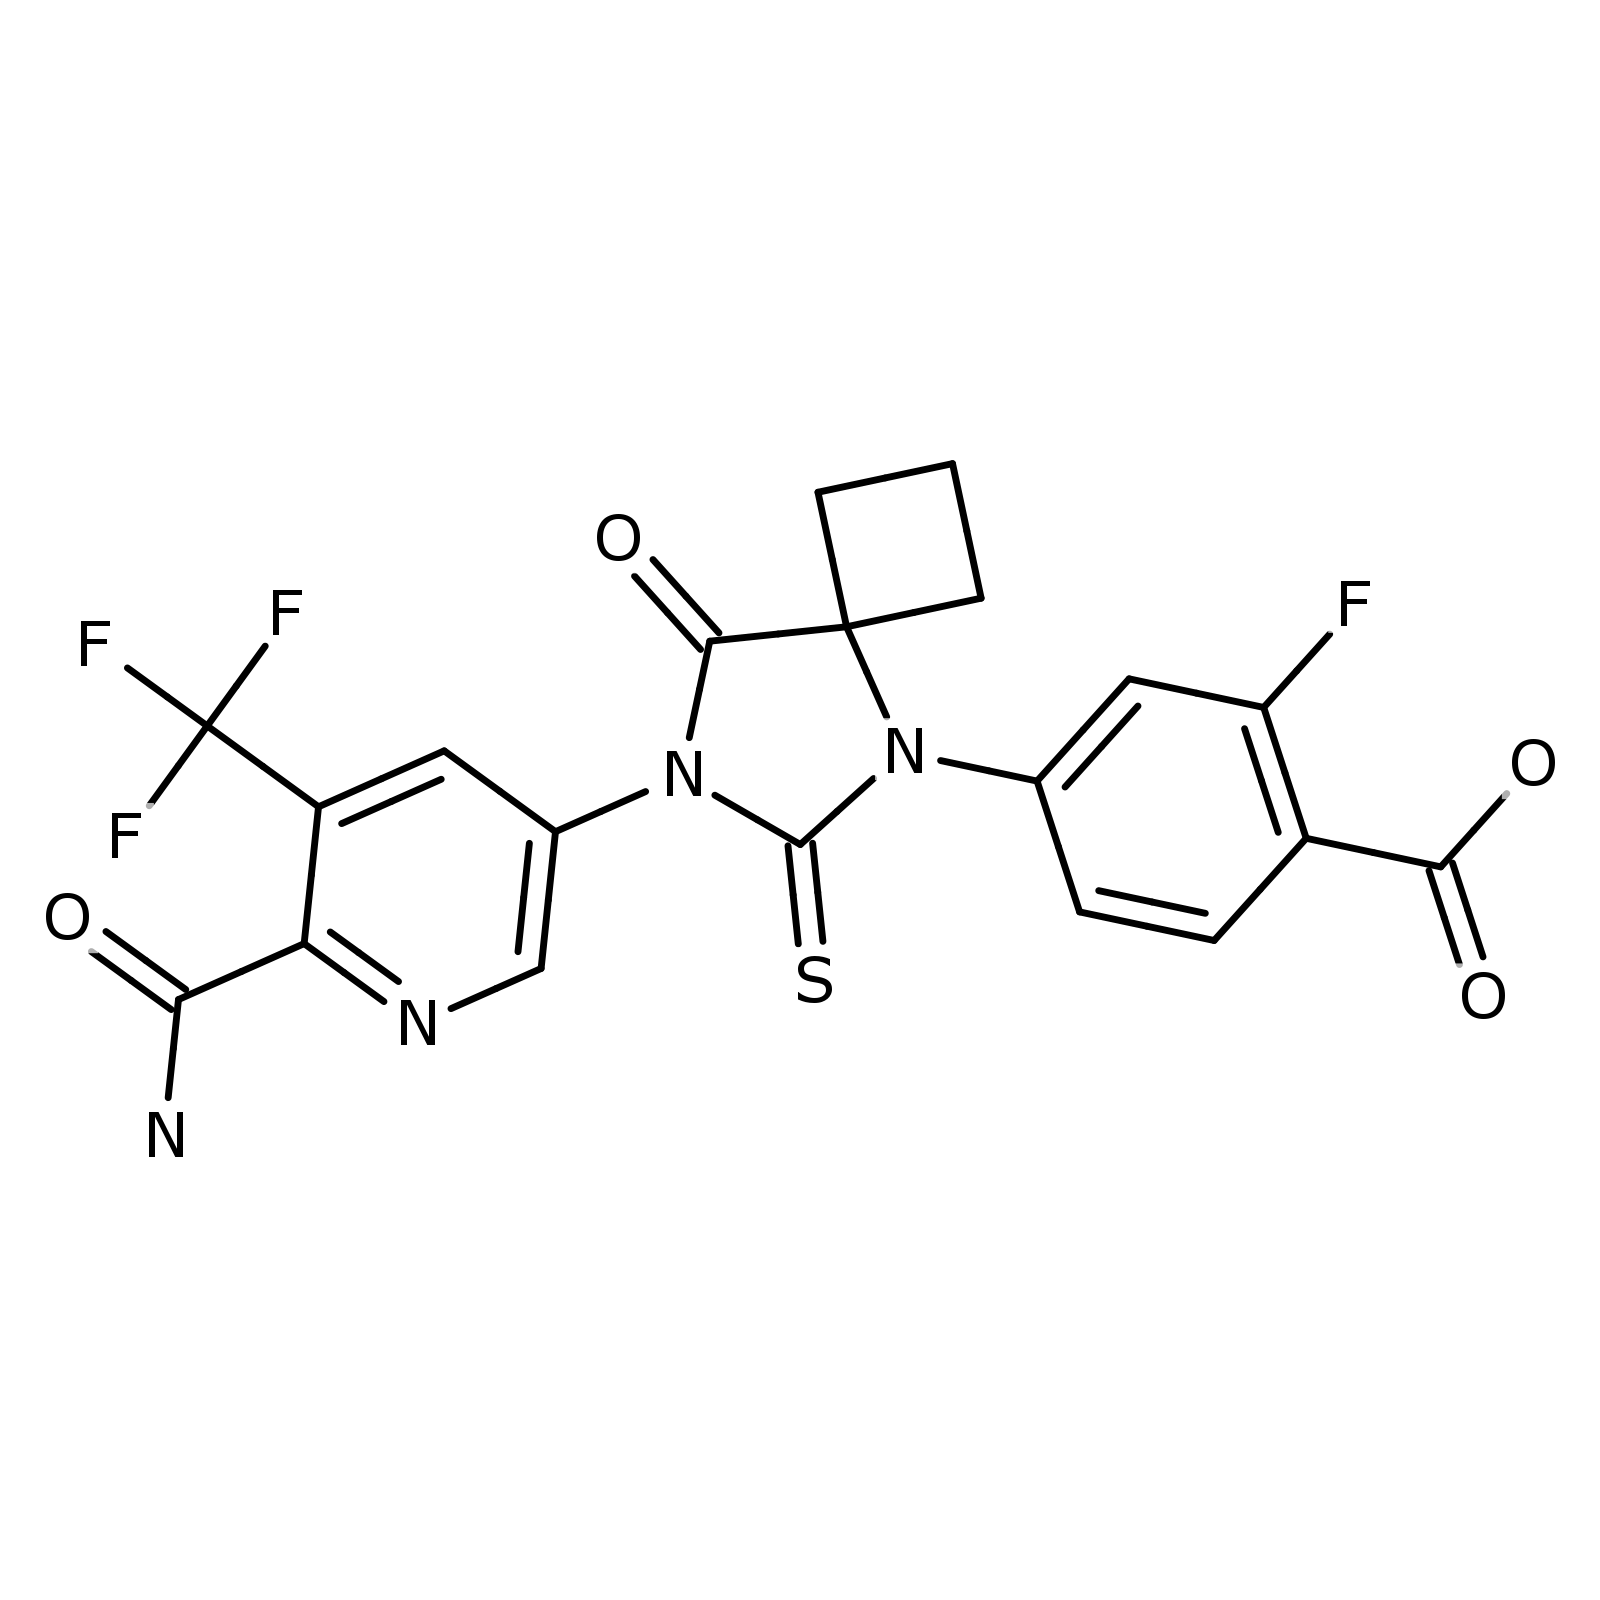 | D7 | D1 | 630 | Hydrolysis of amide | Hydrolyses | Water; pH |
| 7 | 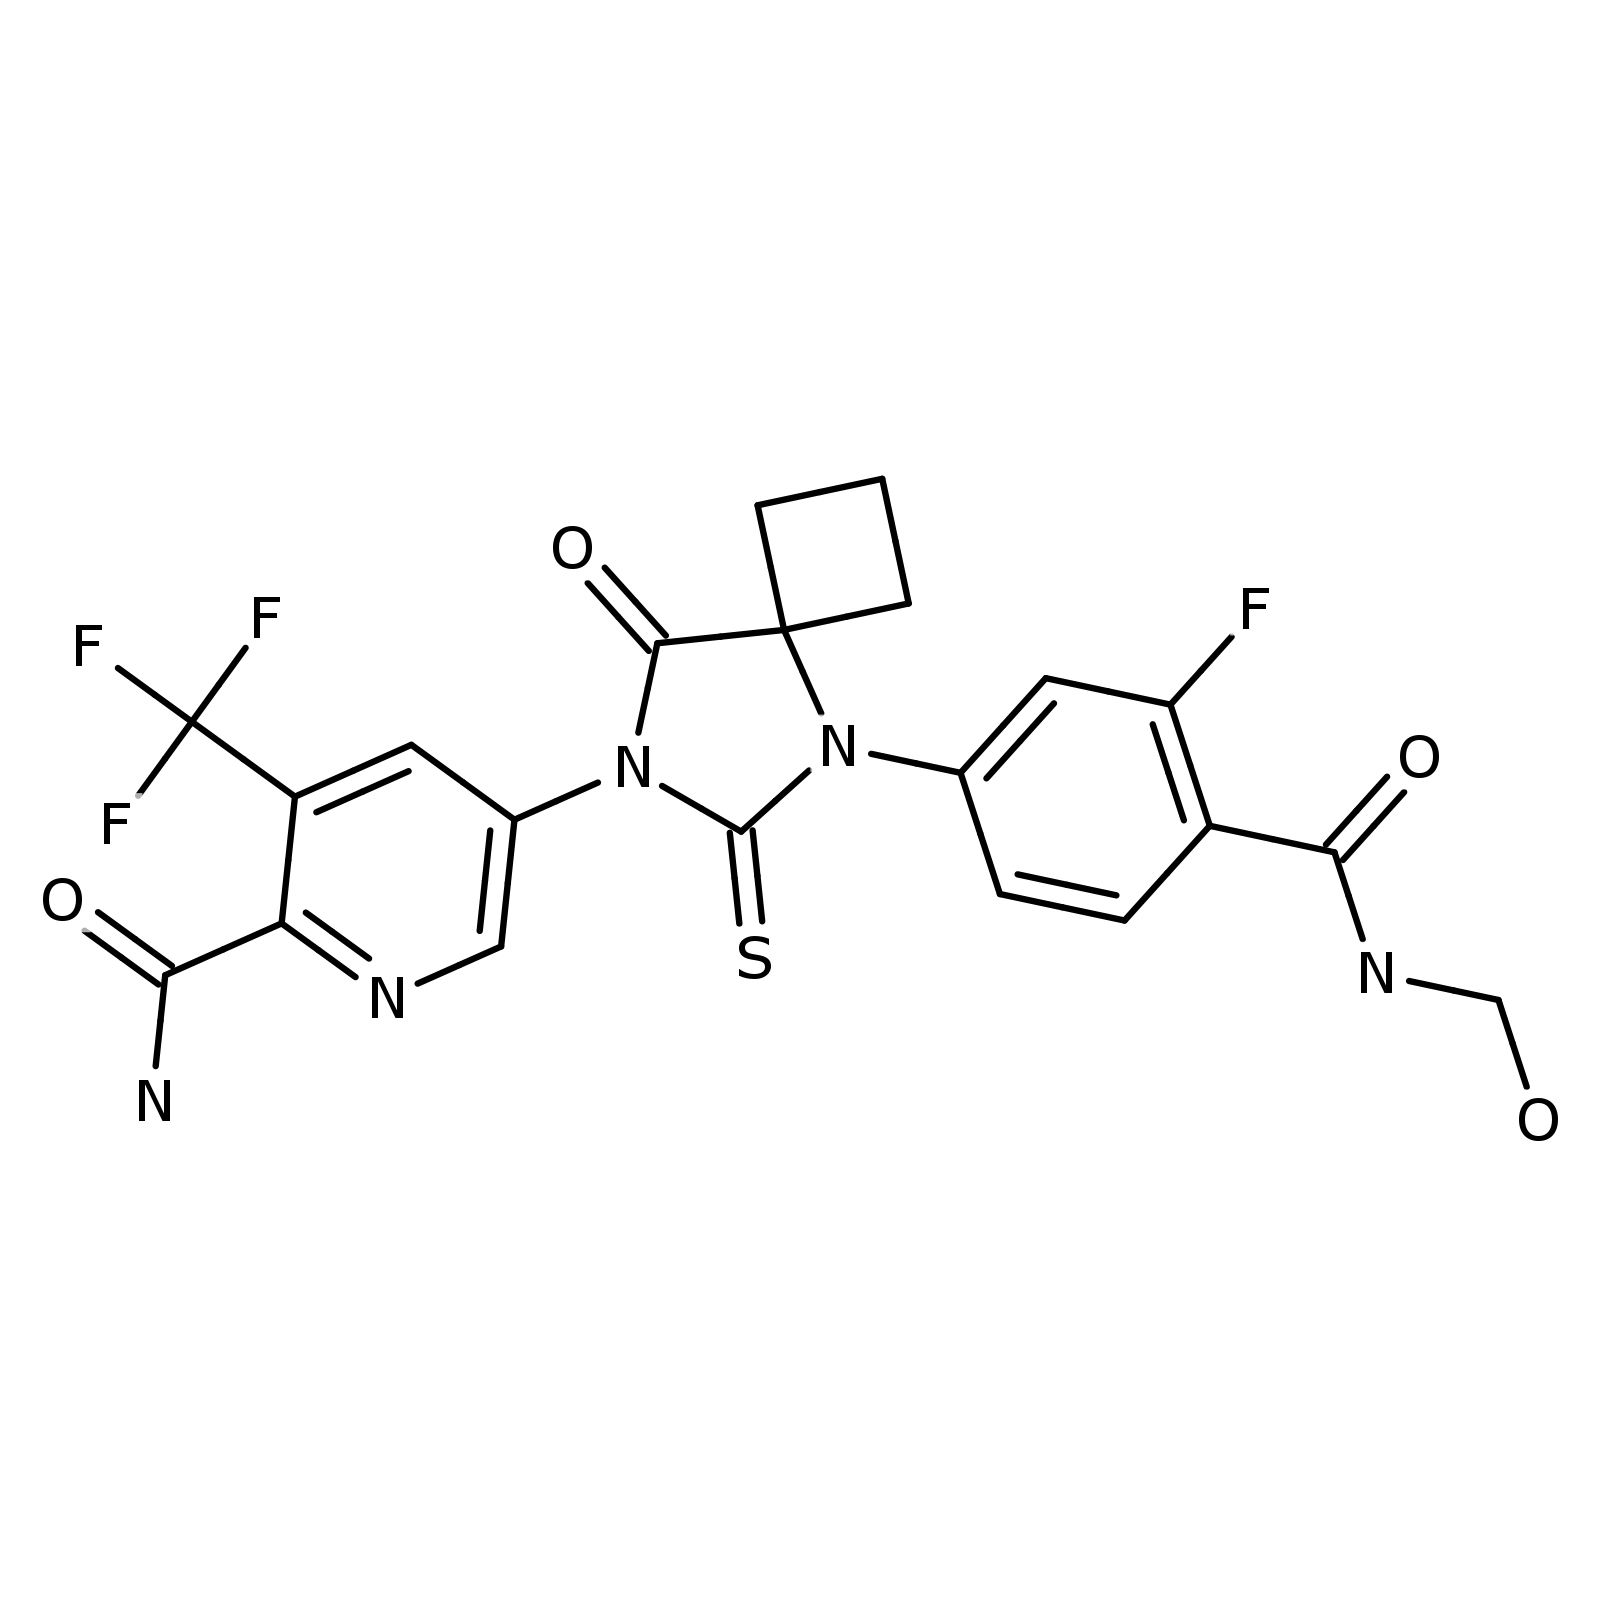 | D8 | D1 | 630 | Oxidation of N-alkyl amide to hemiamidal | Oxidations | Oxygen; Radical or Light |
| 8 | 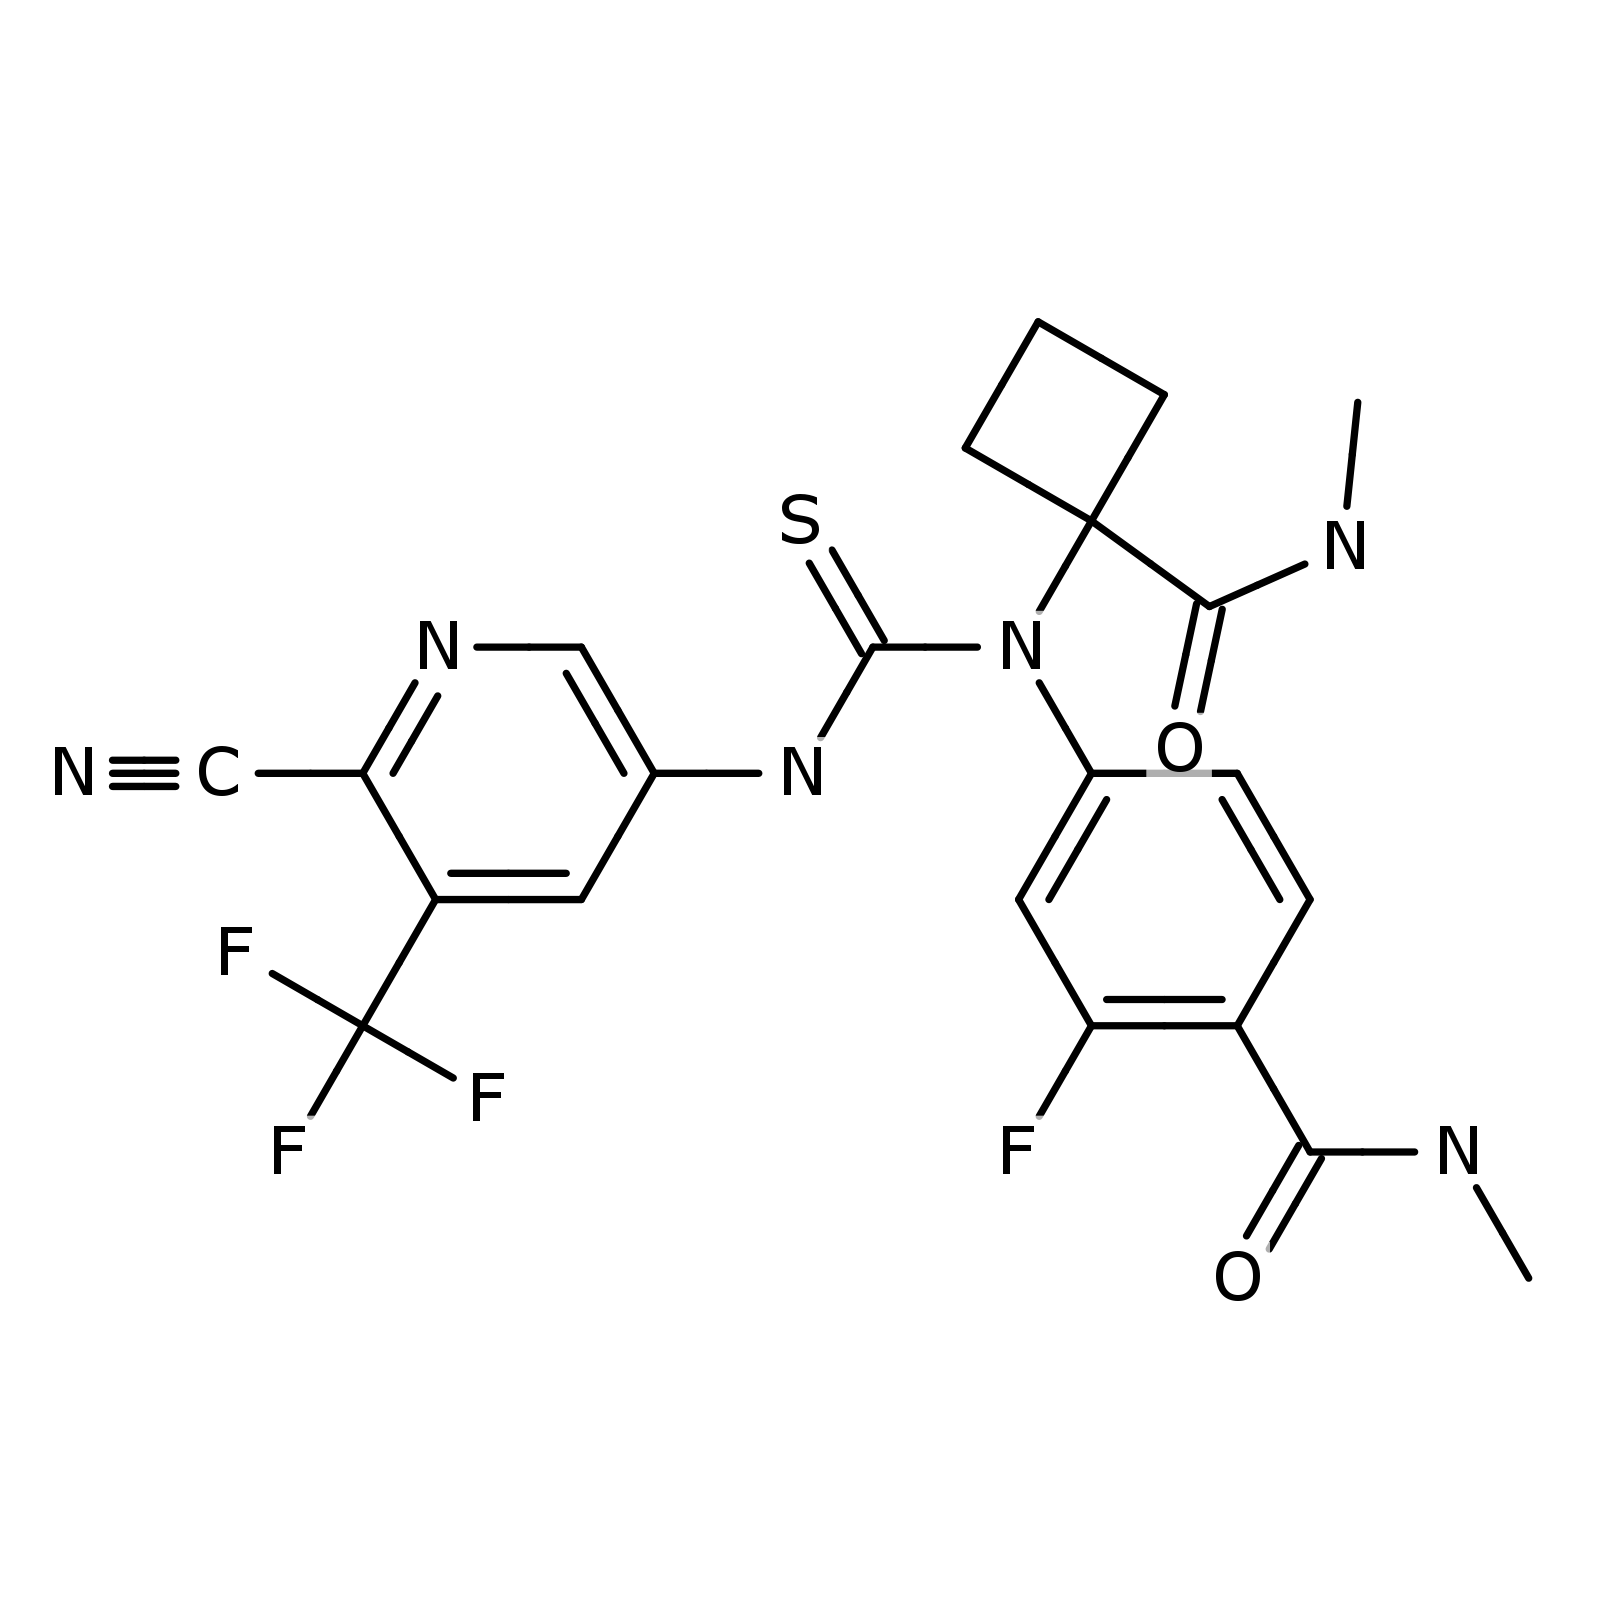 | D9 | D2 | 630 | N-Acylation of amine, hydroxylamine or hydrazine | Condensations and additions |  |
| 9 | 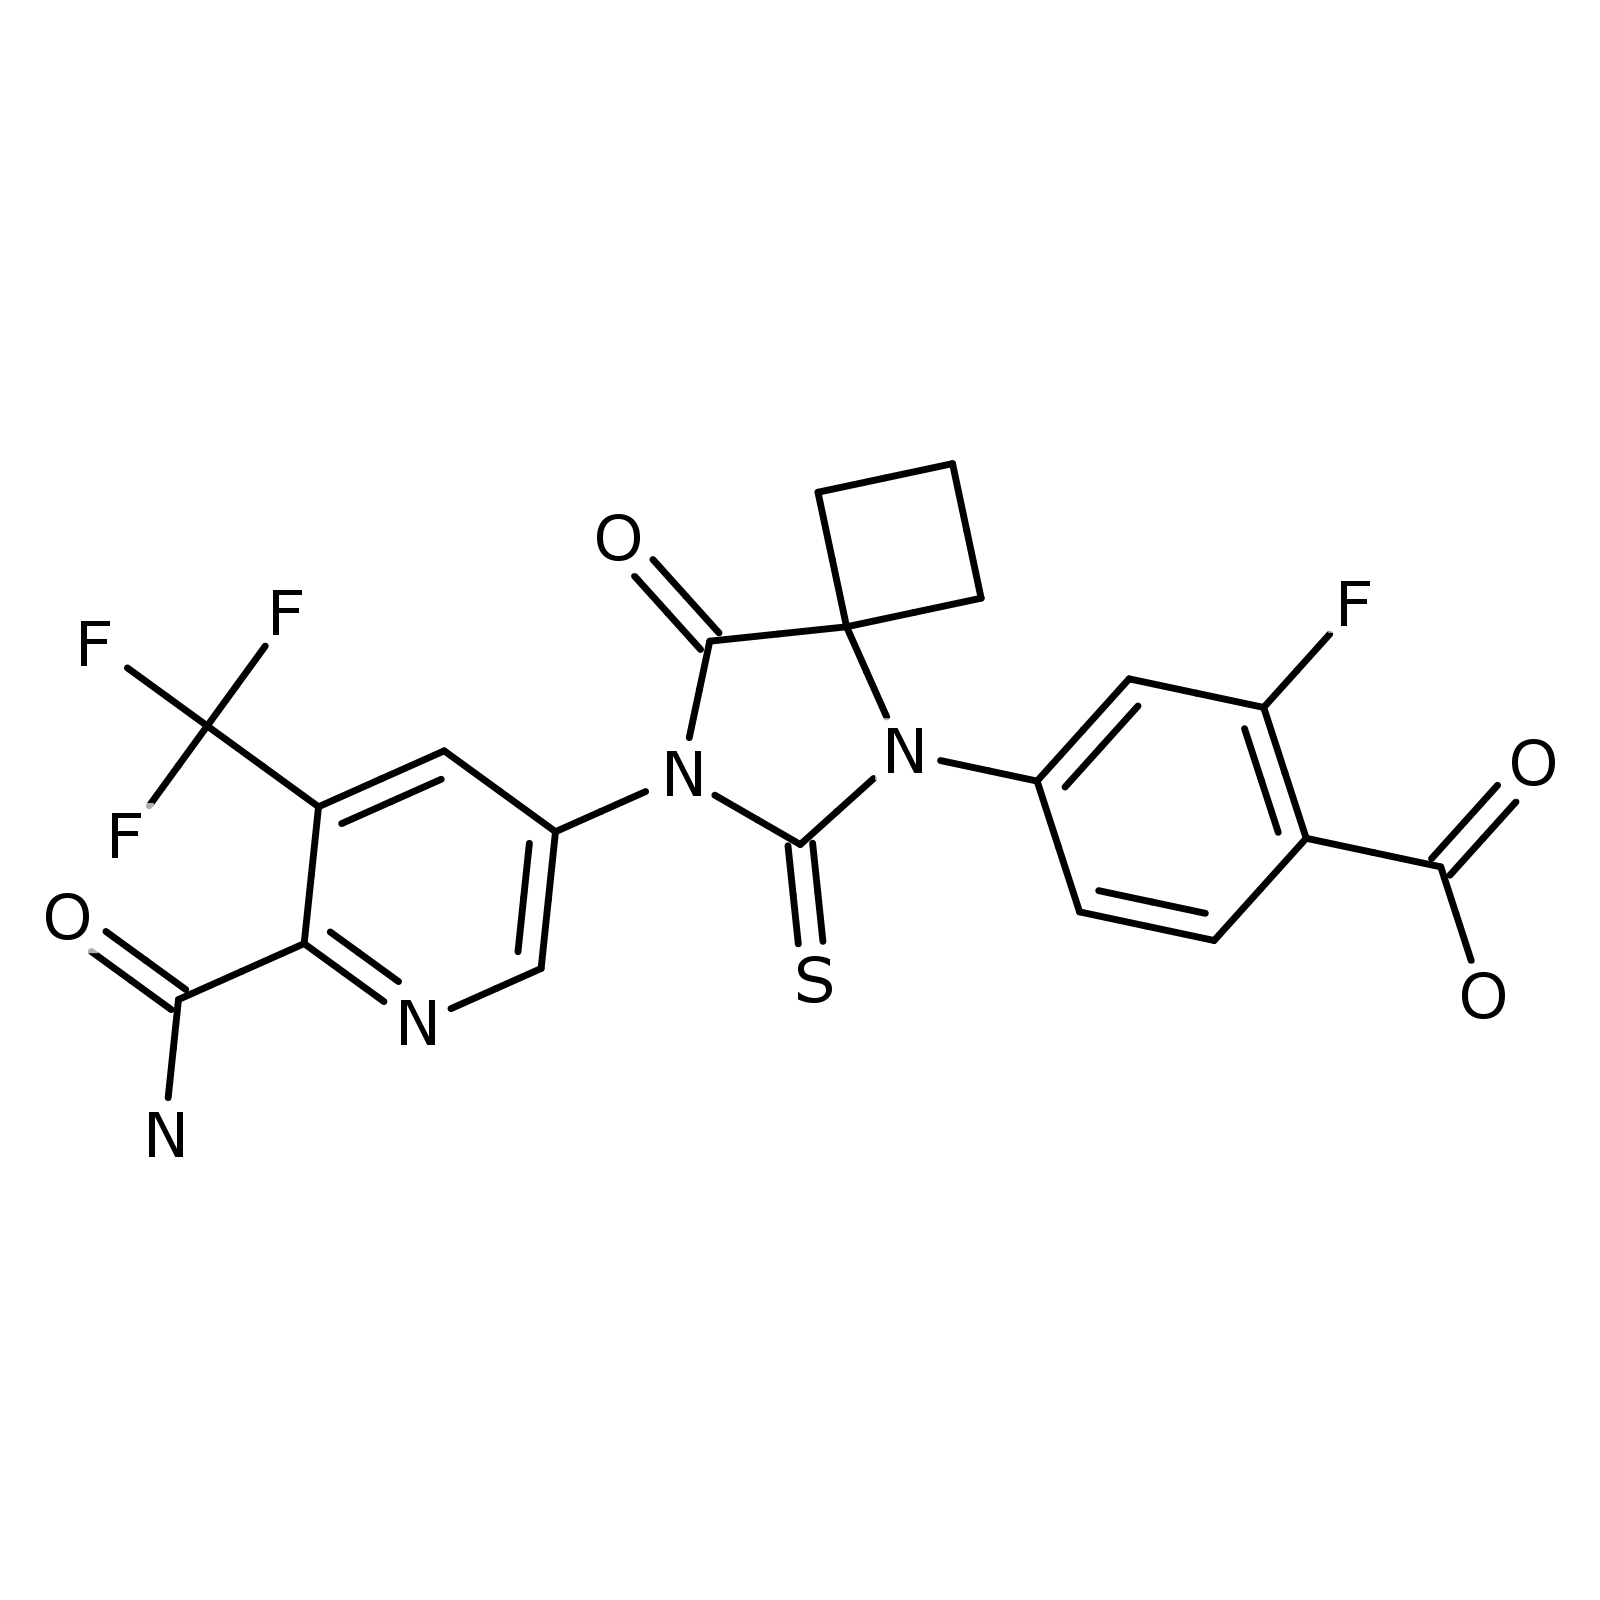 | D10 | D3 | 630 | Hydration of nitrile | Condensations and additions | Water; pH |
| 10 | 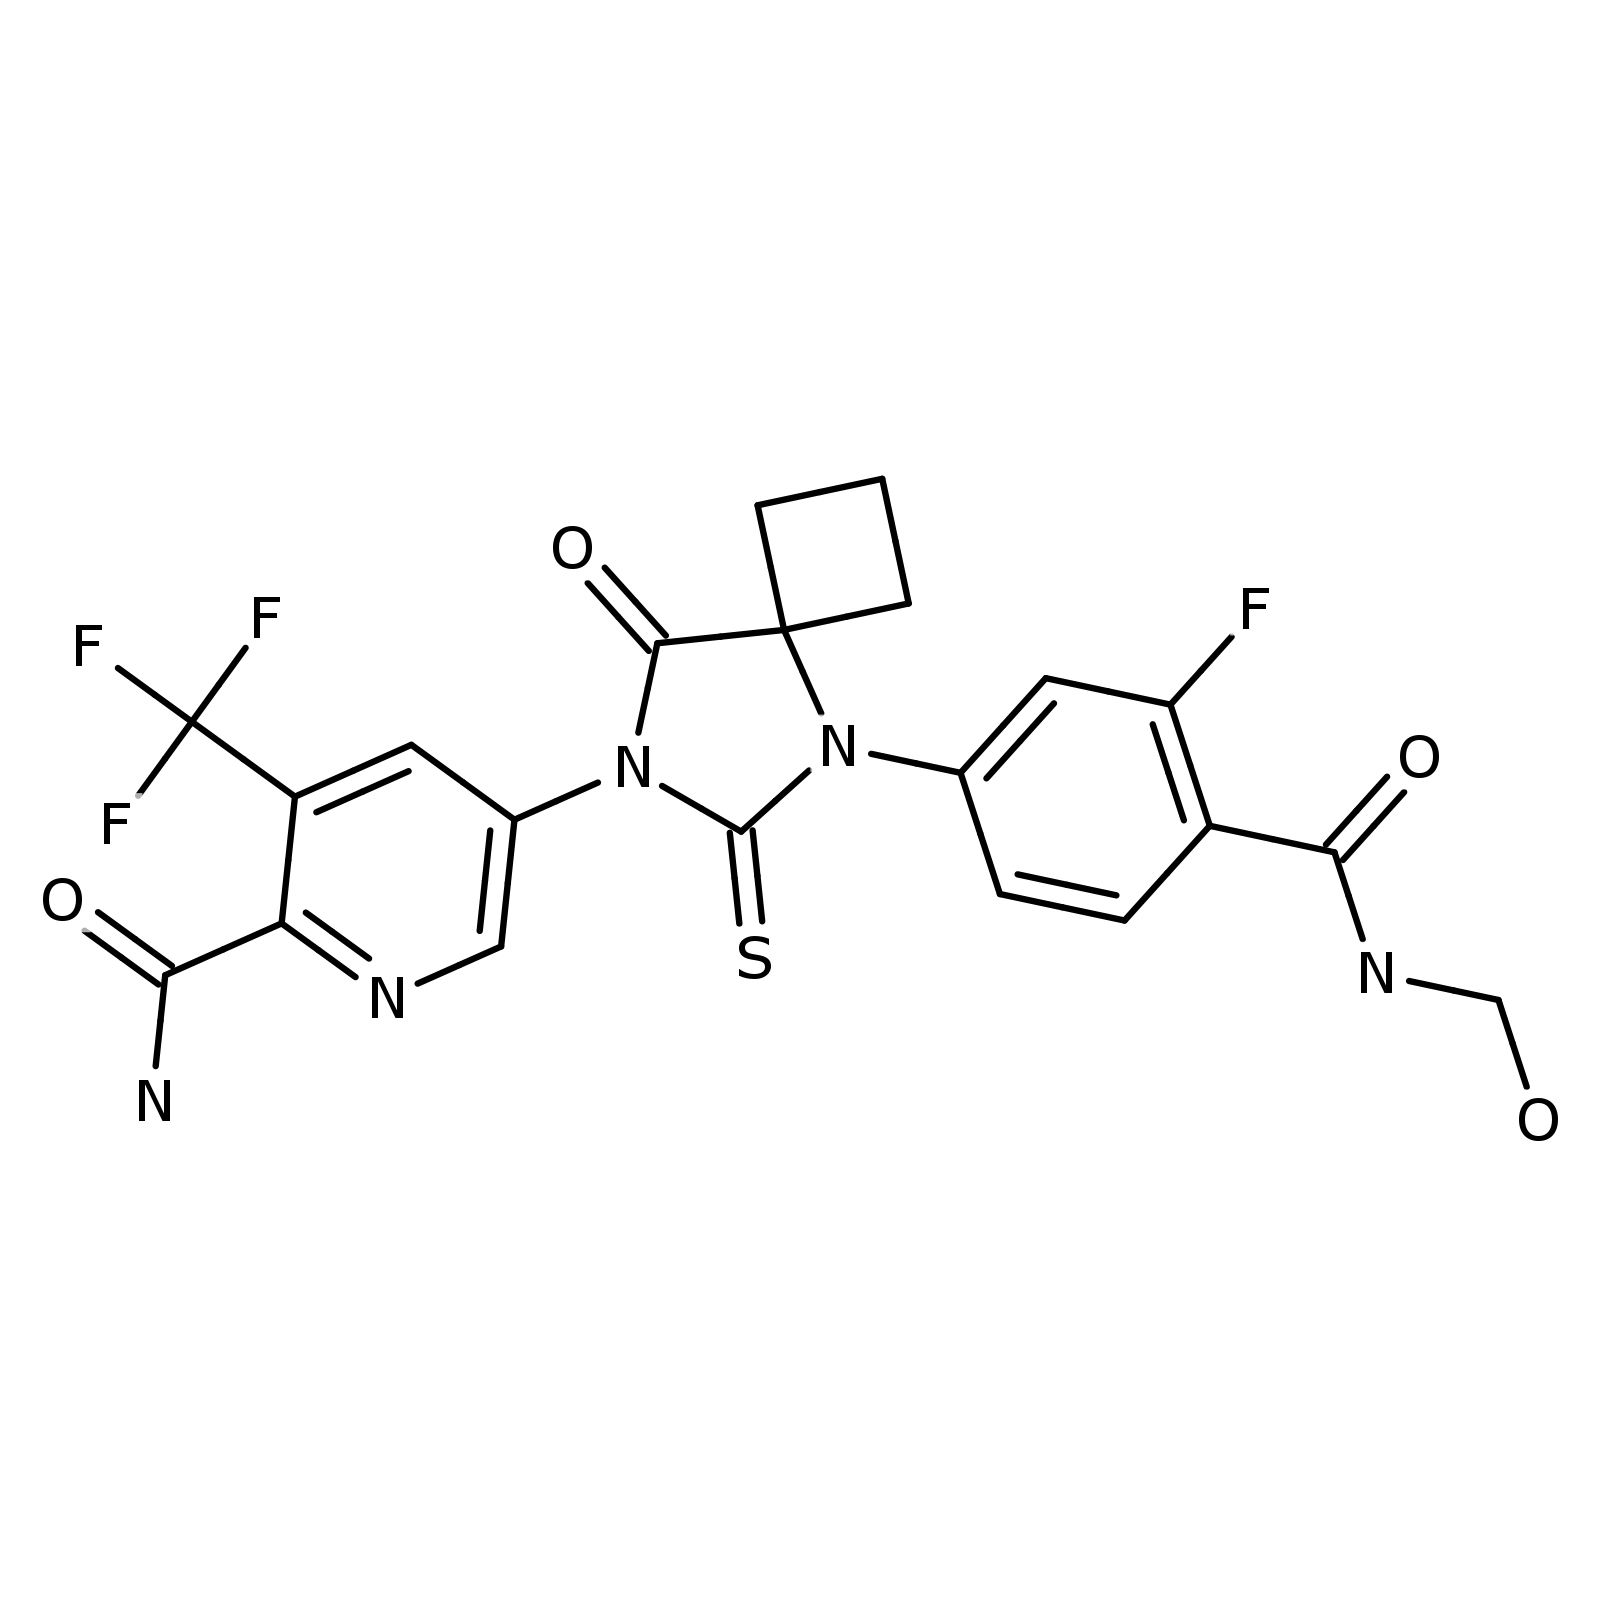 | D11 | D4 | 630 | Hydration of nitrile | Condensations and additions | Water; pH |
| 11 | 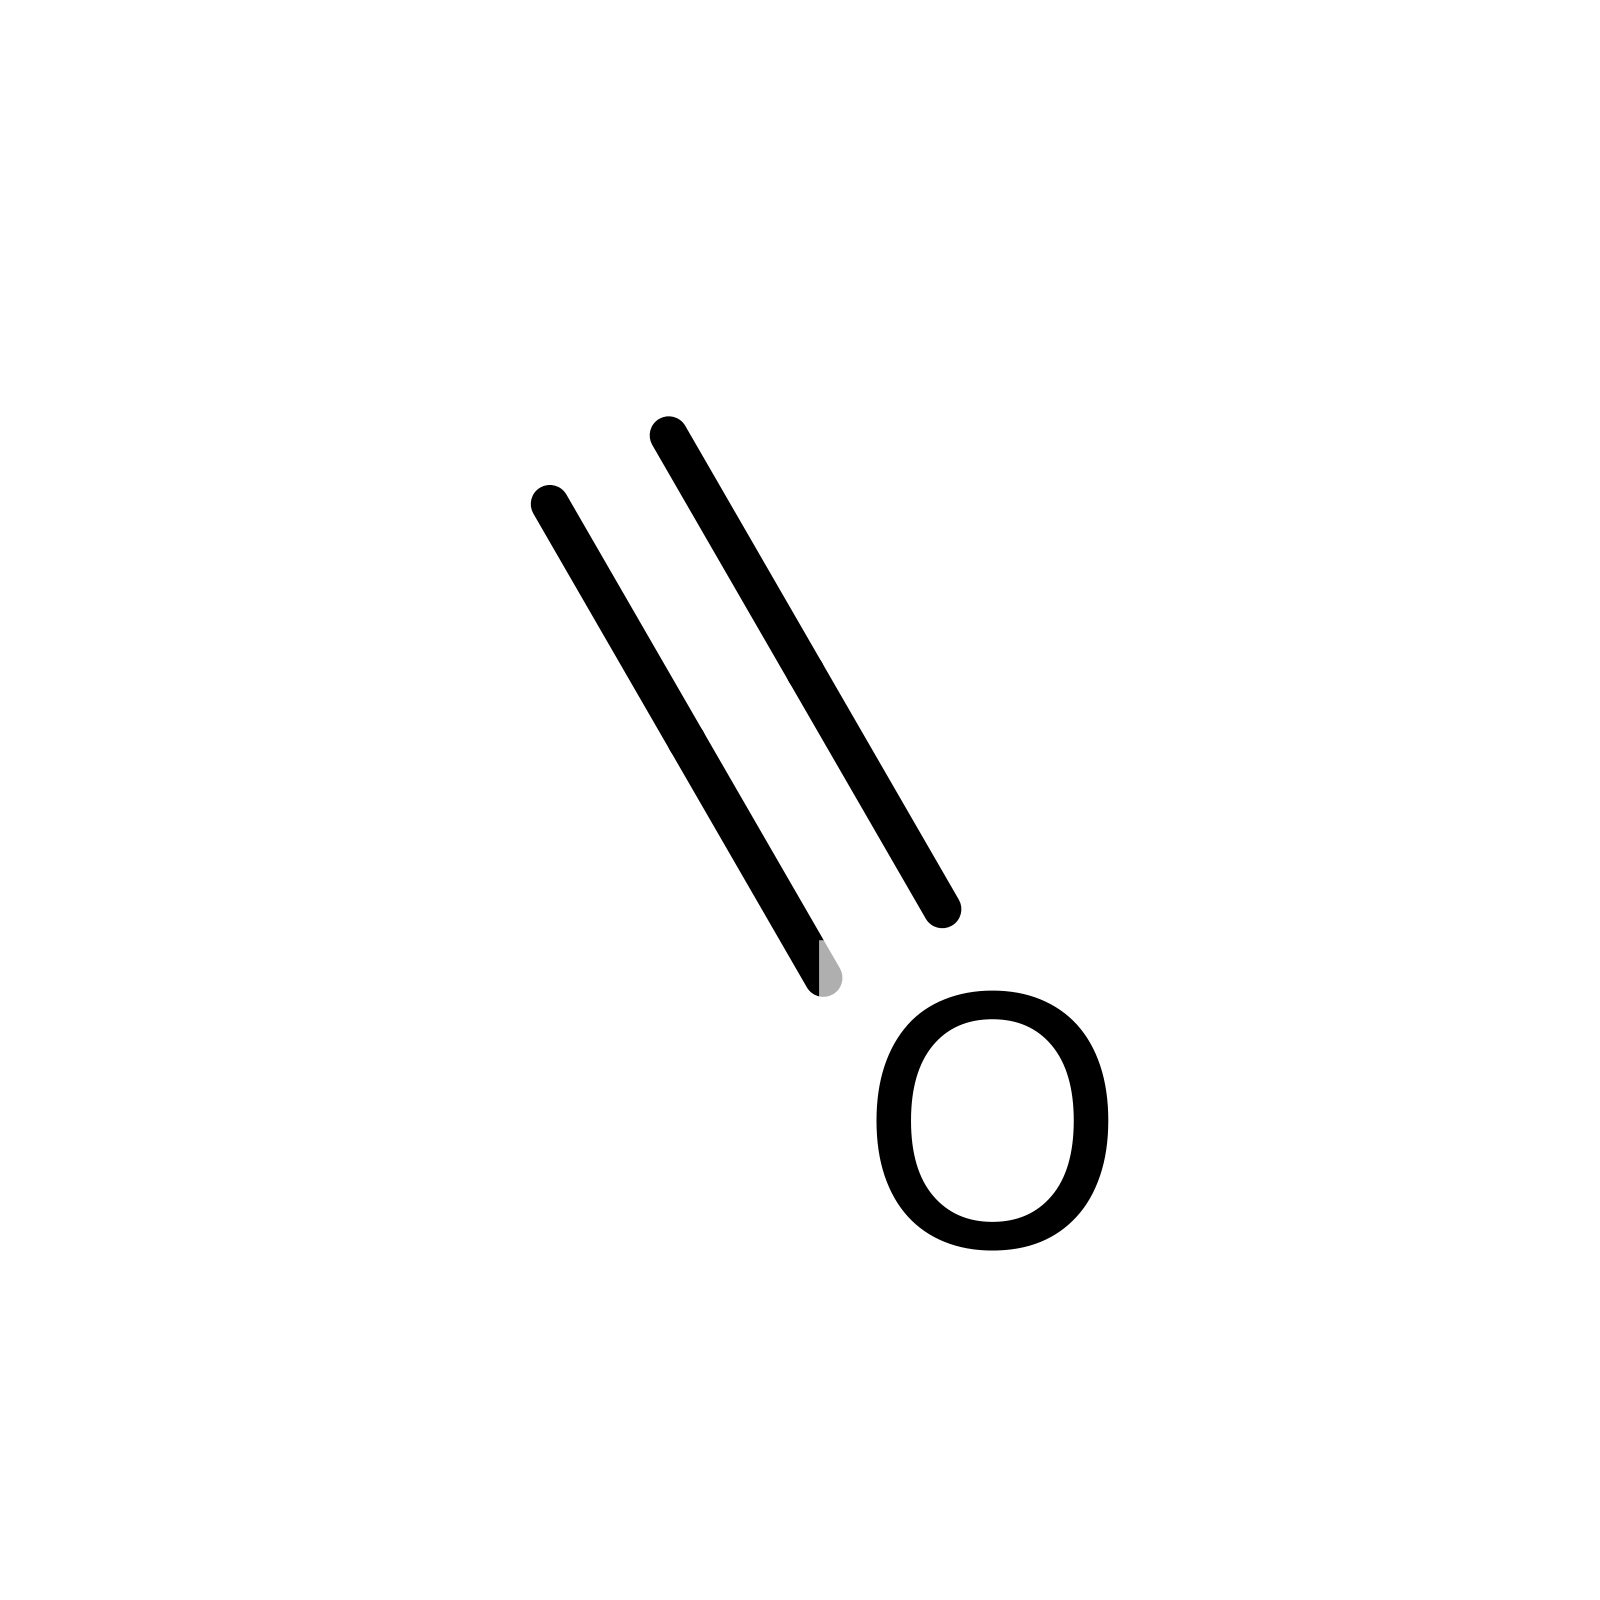 | D12 | D4 | 630 | Cleavage of acyclic hemiaminal, hemiacetal or hemimercaptal | Eliminations and fragmentations |  |
| 12 | 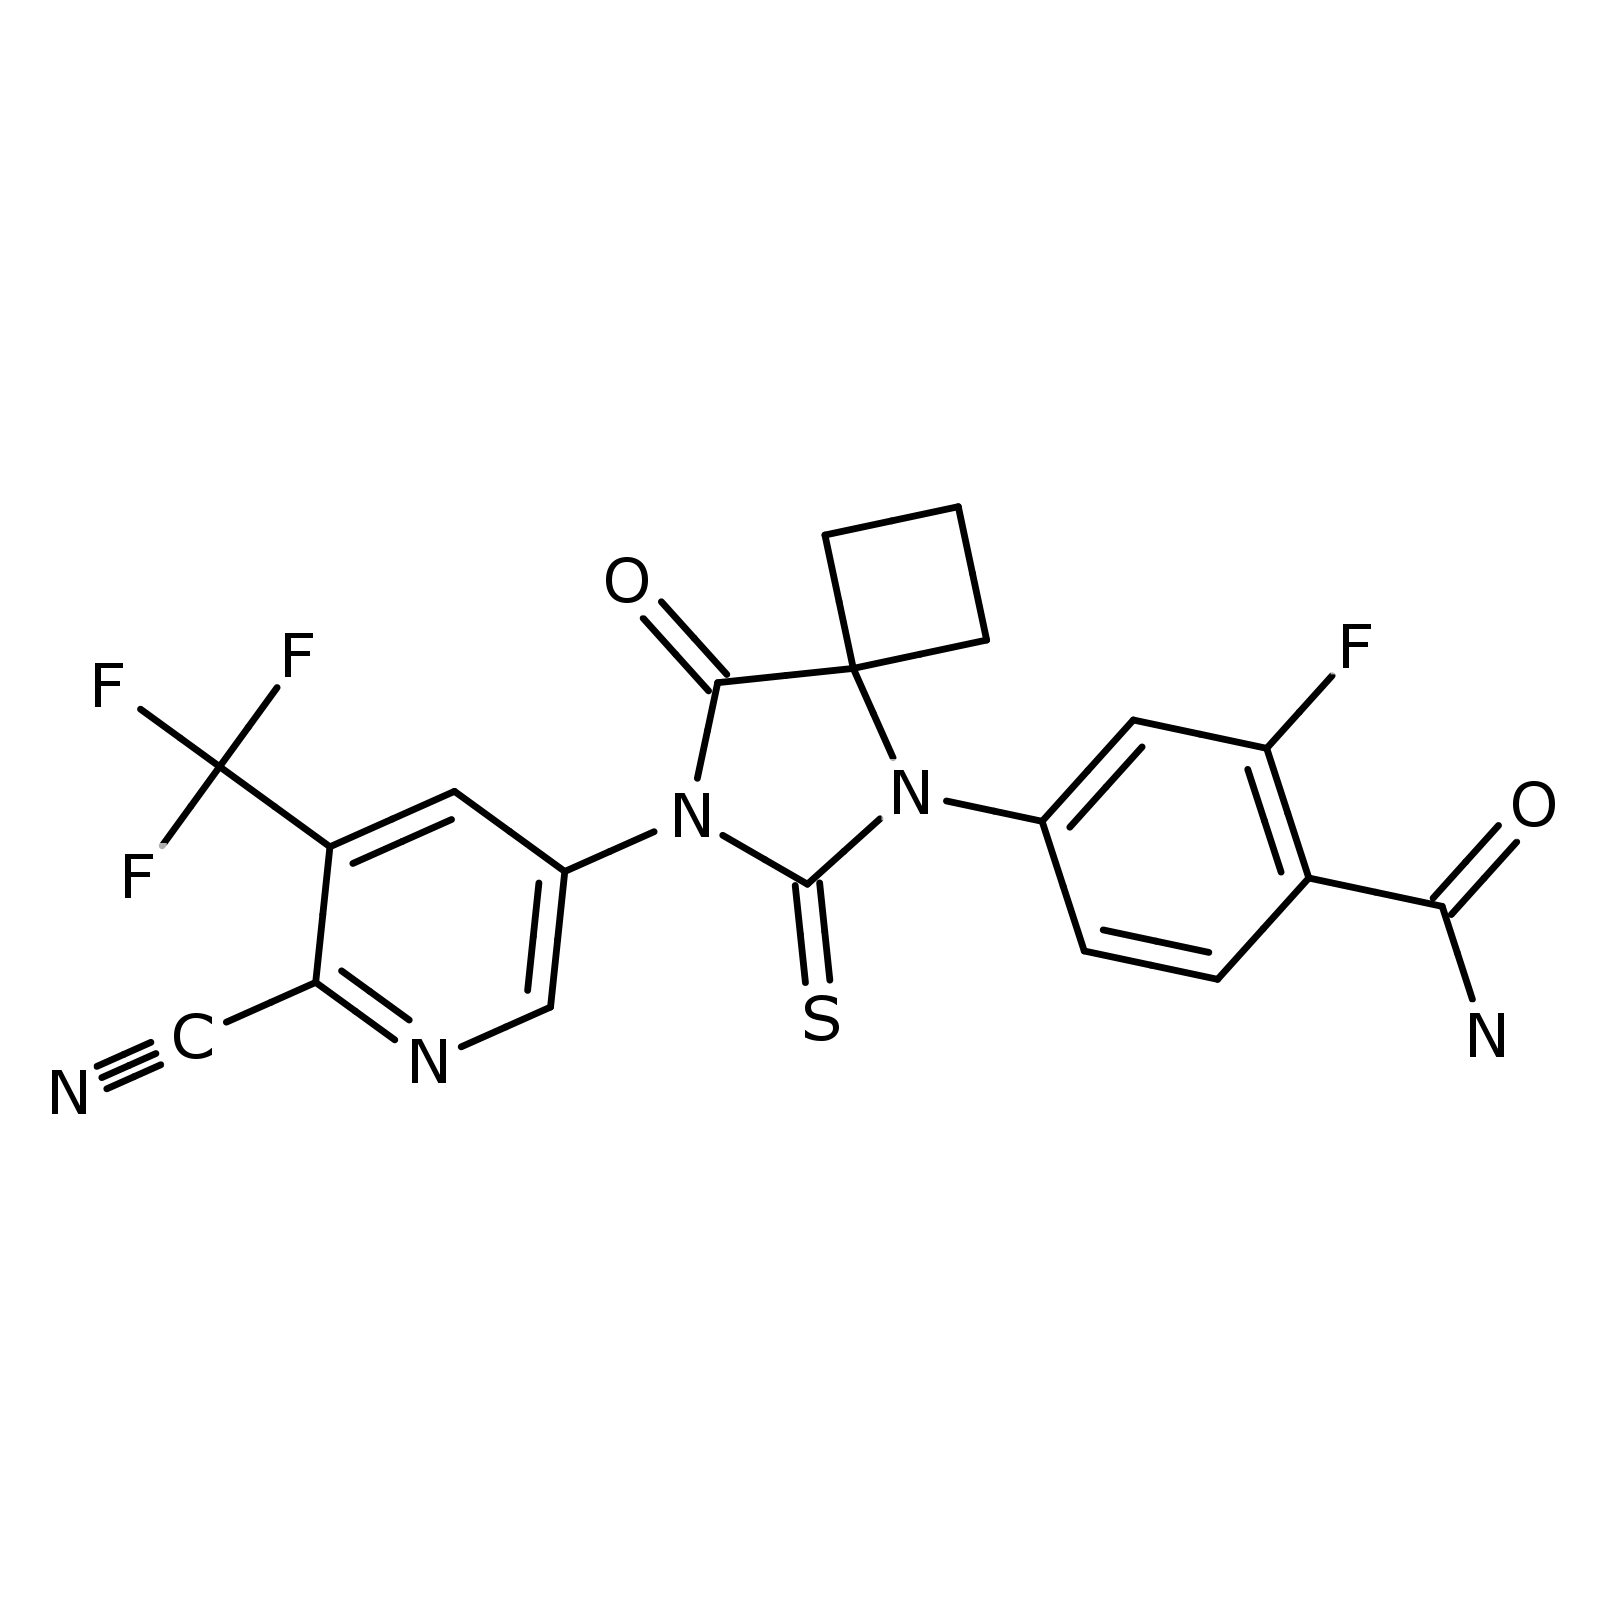 | D13 | D4 | 630 | Cleavage of acyclic hemiaminal, hemiacetal or hemimercaptal | Eliminations and fragmentations |  |
| **Basic** **hydrolysis** | | | | | | | |
| 1 | 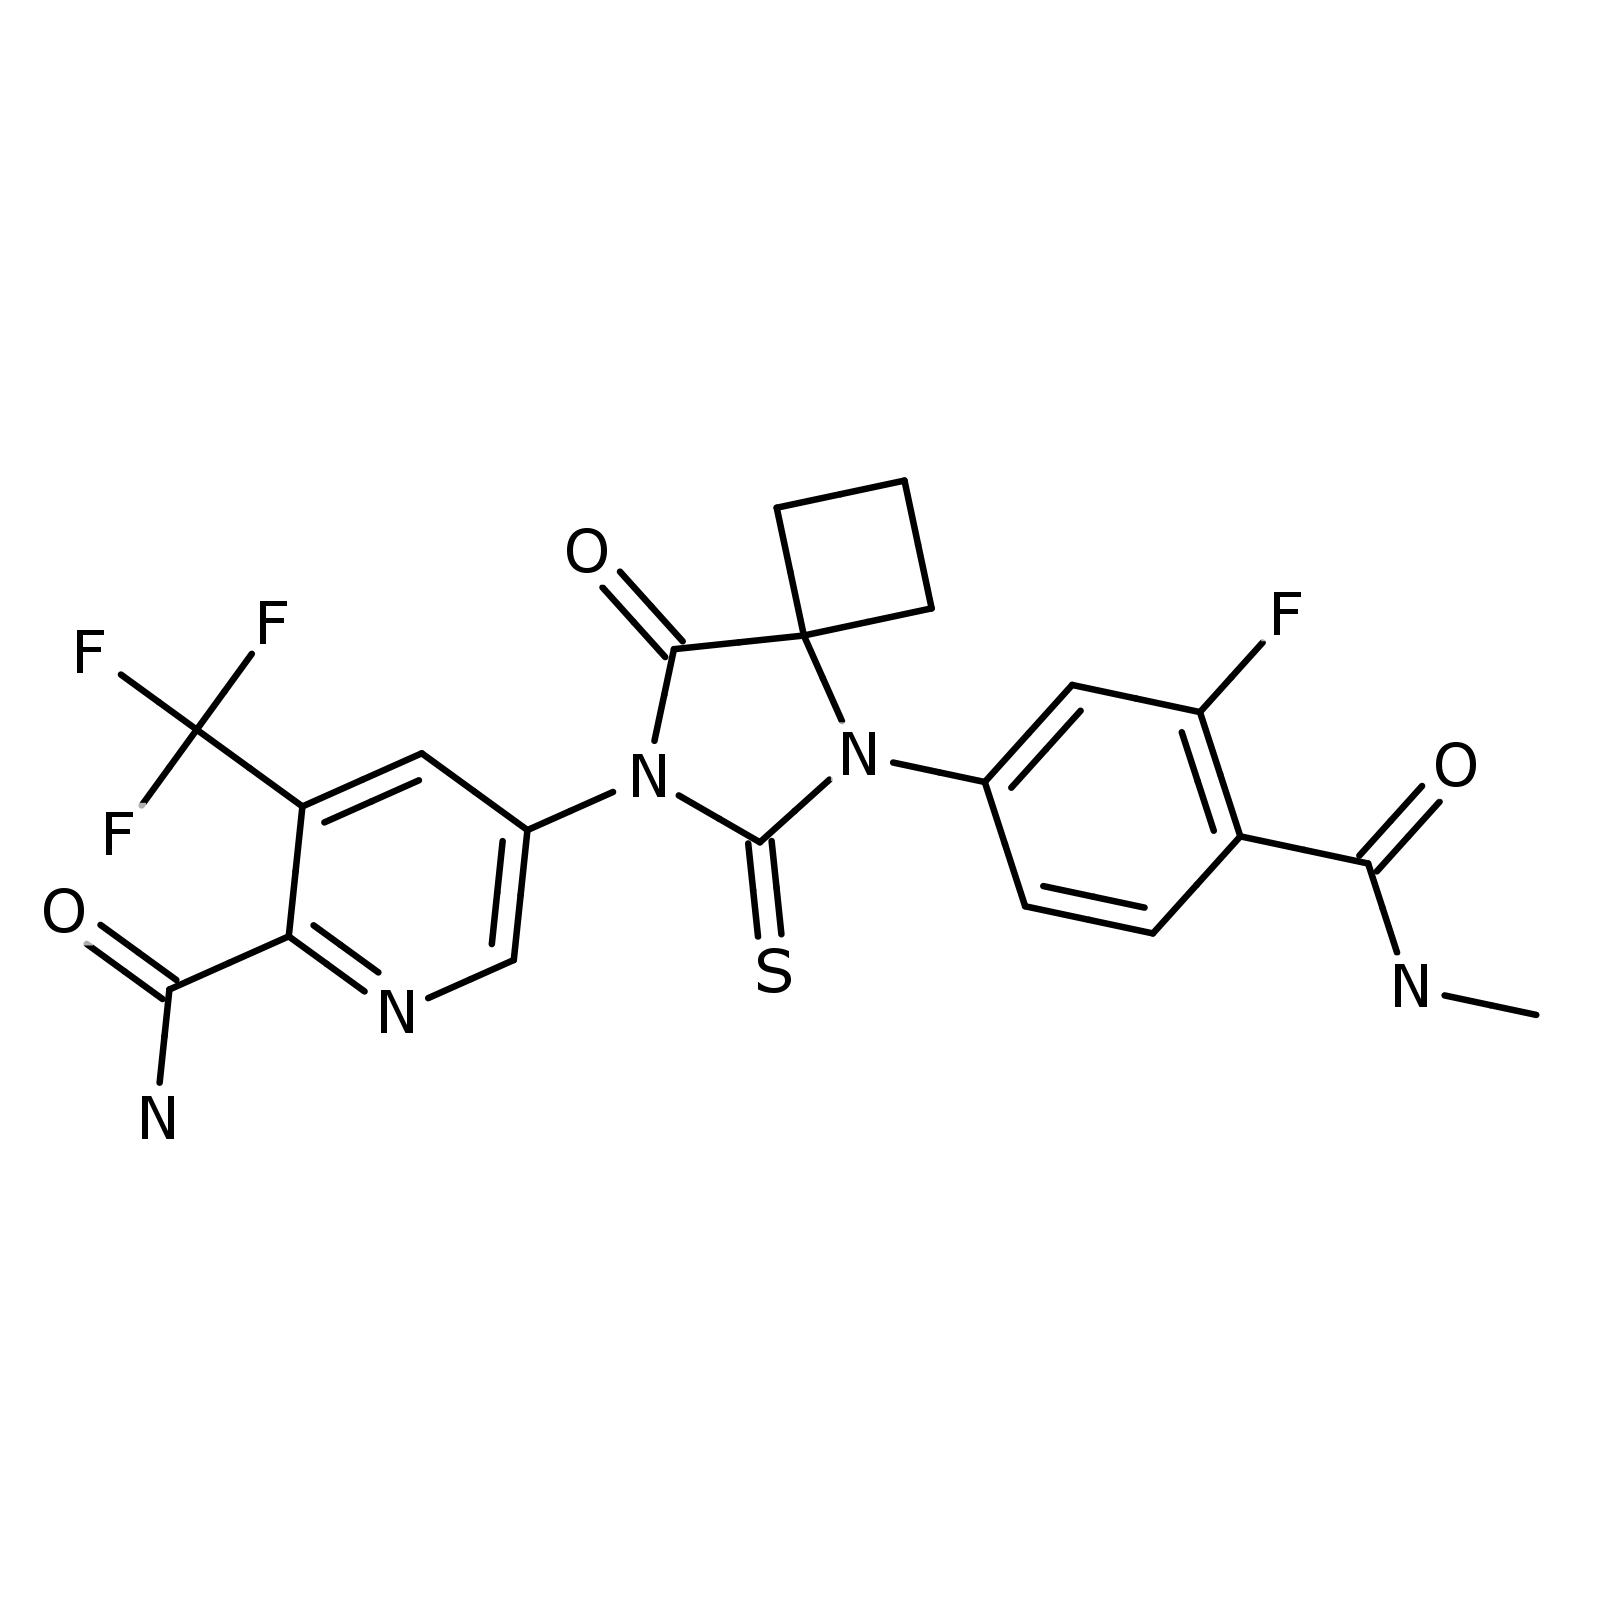 | D1 | Q | 700 | Hydration of nitrile | Condensations and additions | Water; pH |
| 2 | 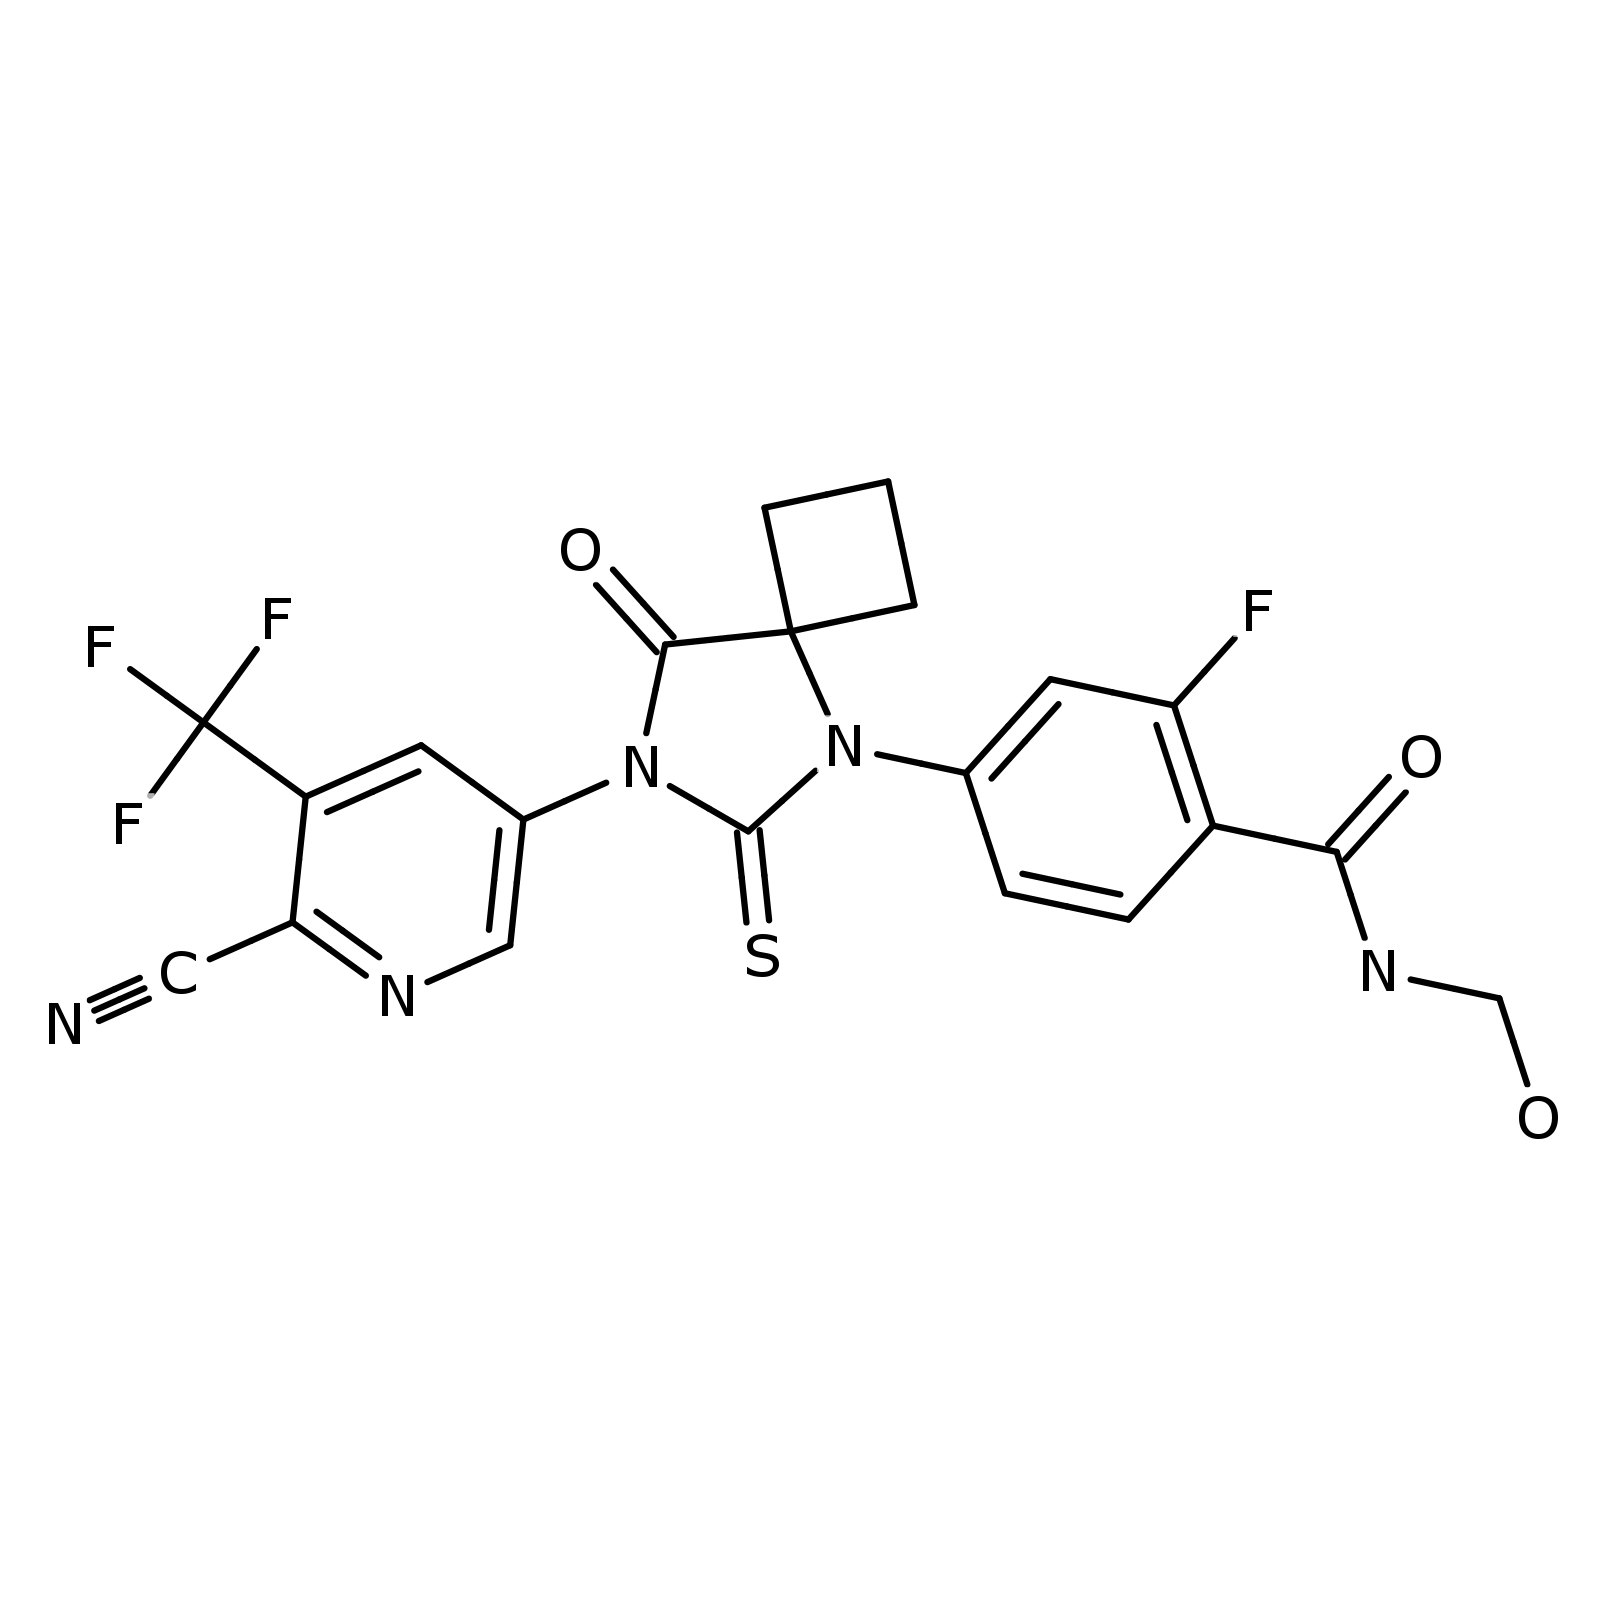 | D2 | Q | 700 | Oxidation of N-alkyl amide to hemiamidal | Oxidations | Oxygen; Radical or Light |
| 3 | 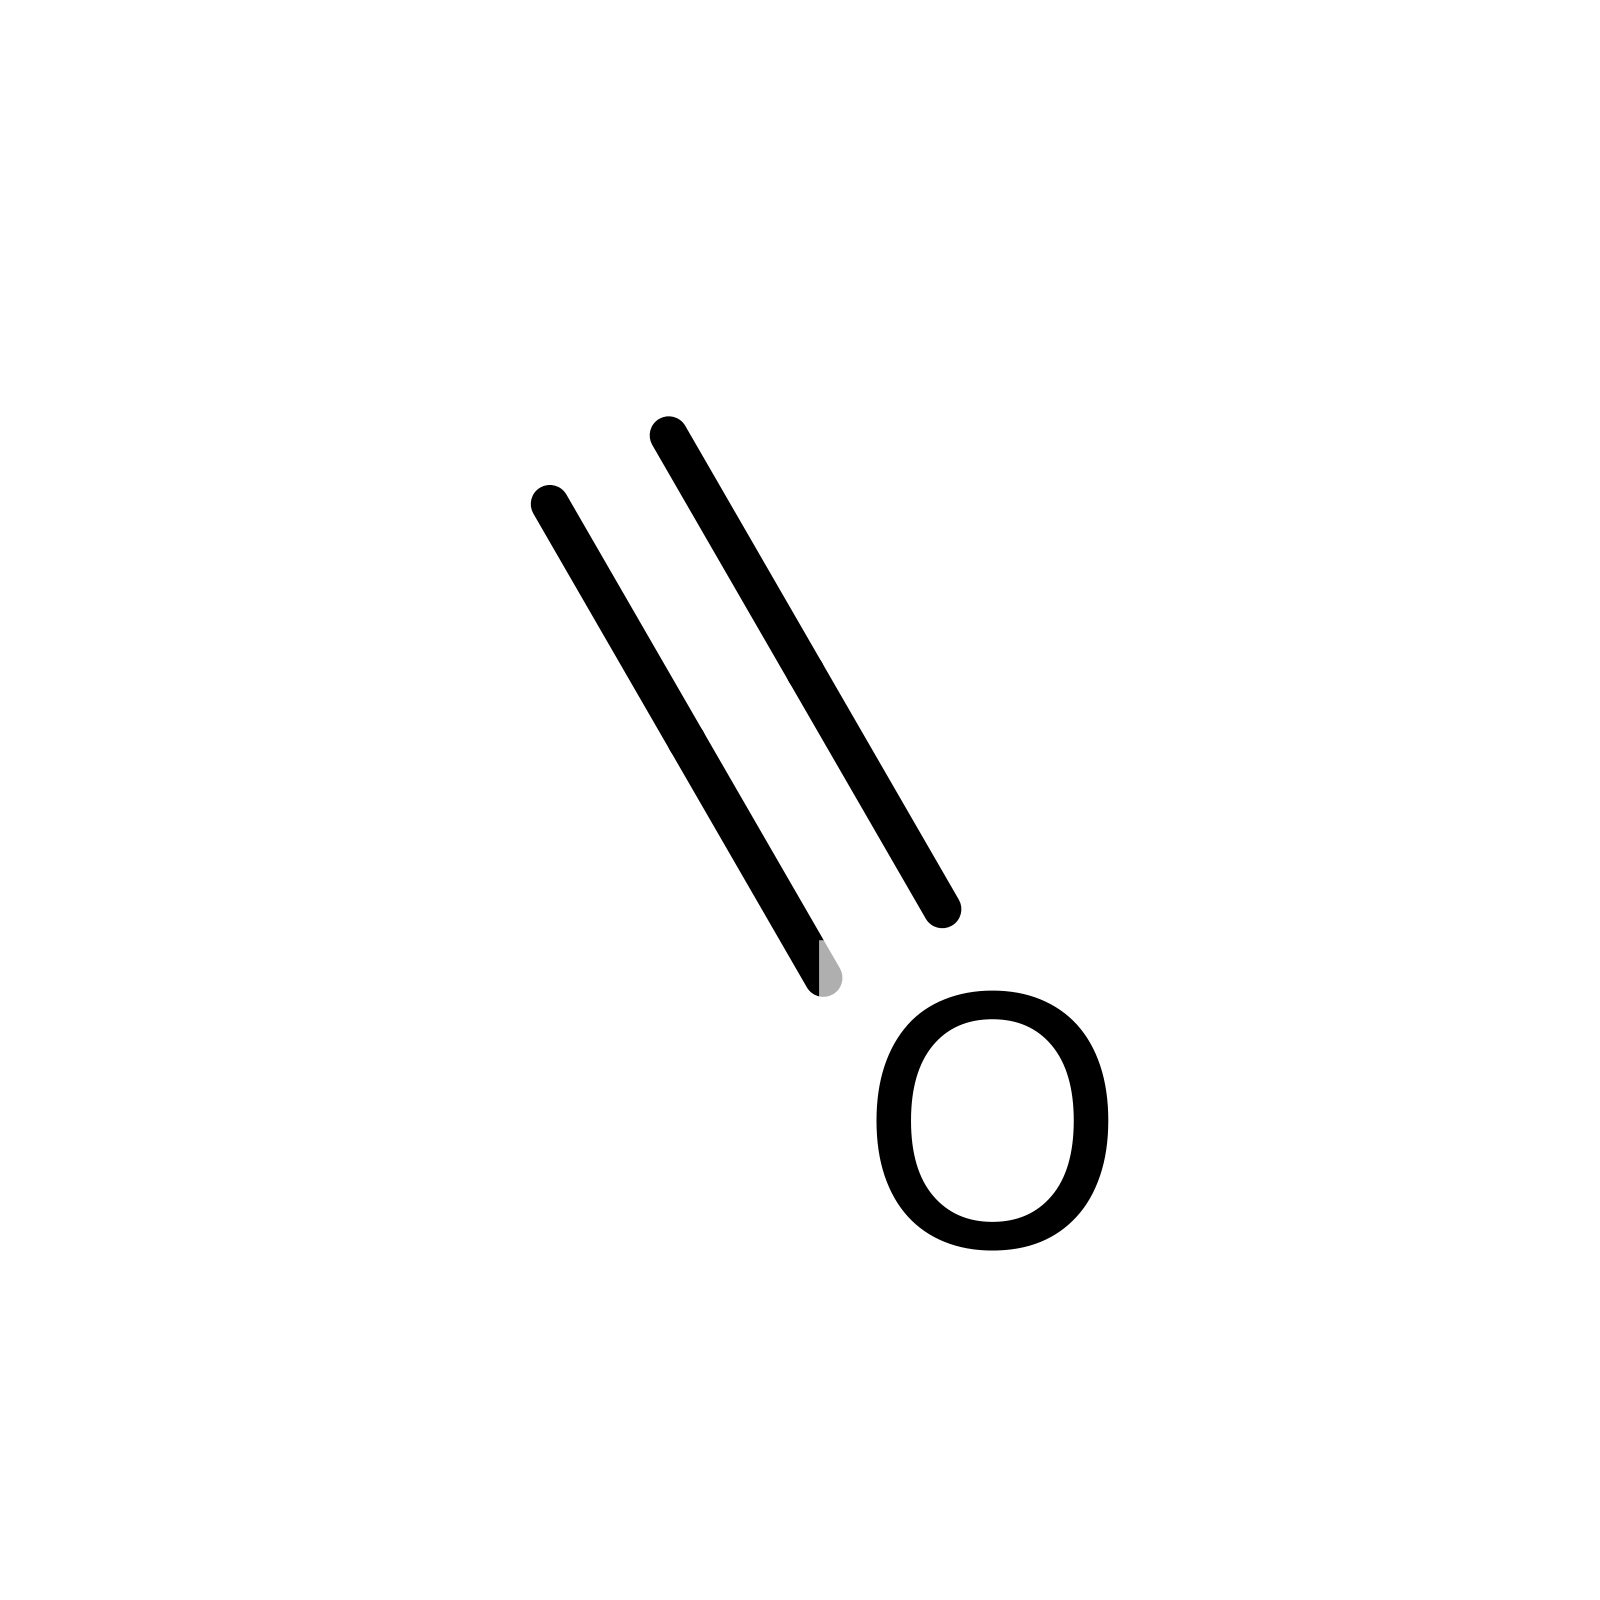 | D3 | D2 | 630 | Cleavage of acyclic hemiaminal, hemiacetal or hemimercaptal | Eliminations and fragmentations |  |
| 4 | 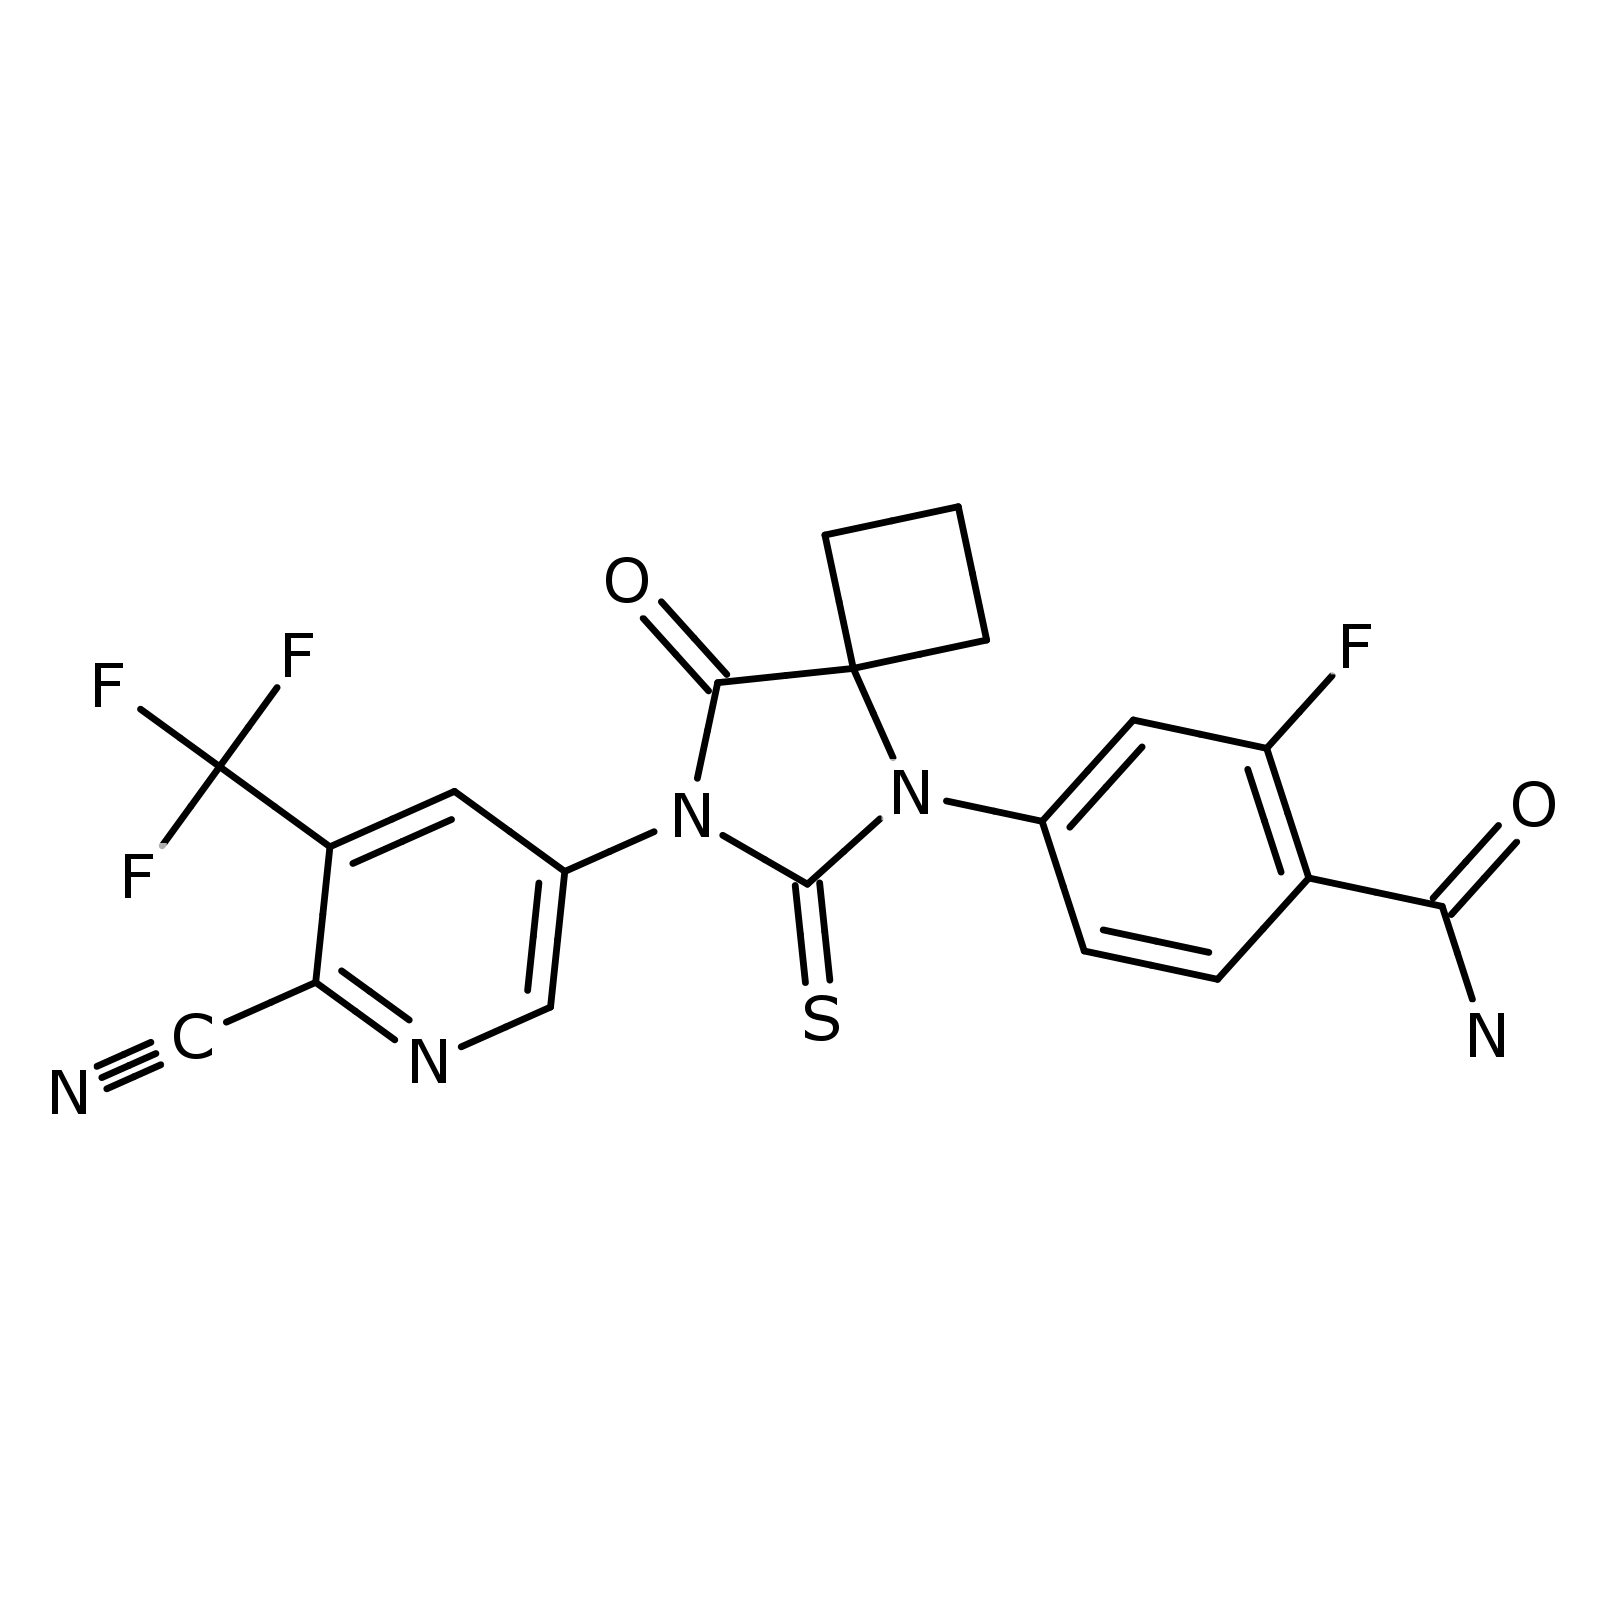 | D4 | D2 | 630 | Cleavage of acyclic hemiaminal, hemiacetal or hemimercaptal | Eliminations and fragmentations |  |
| Neutral hydrolysis | | | | | | | |
| 1 | 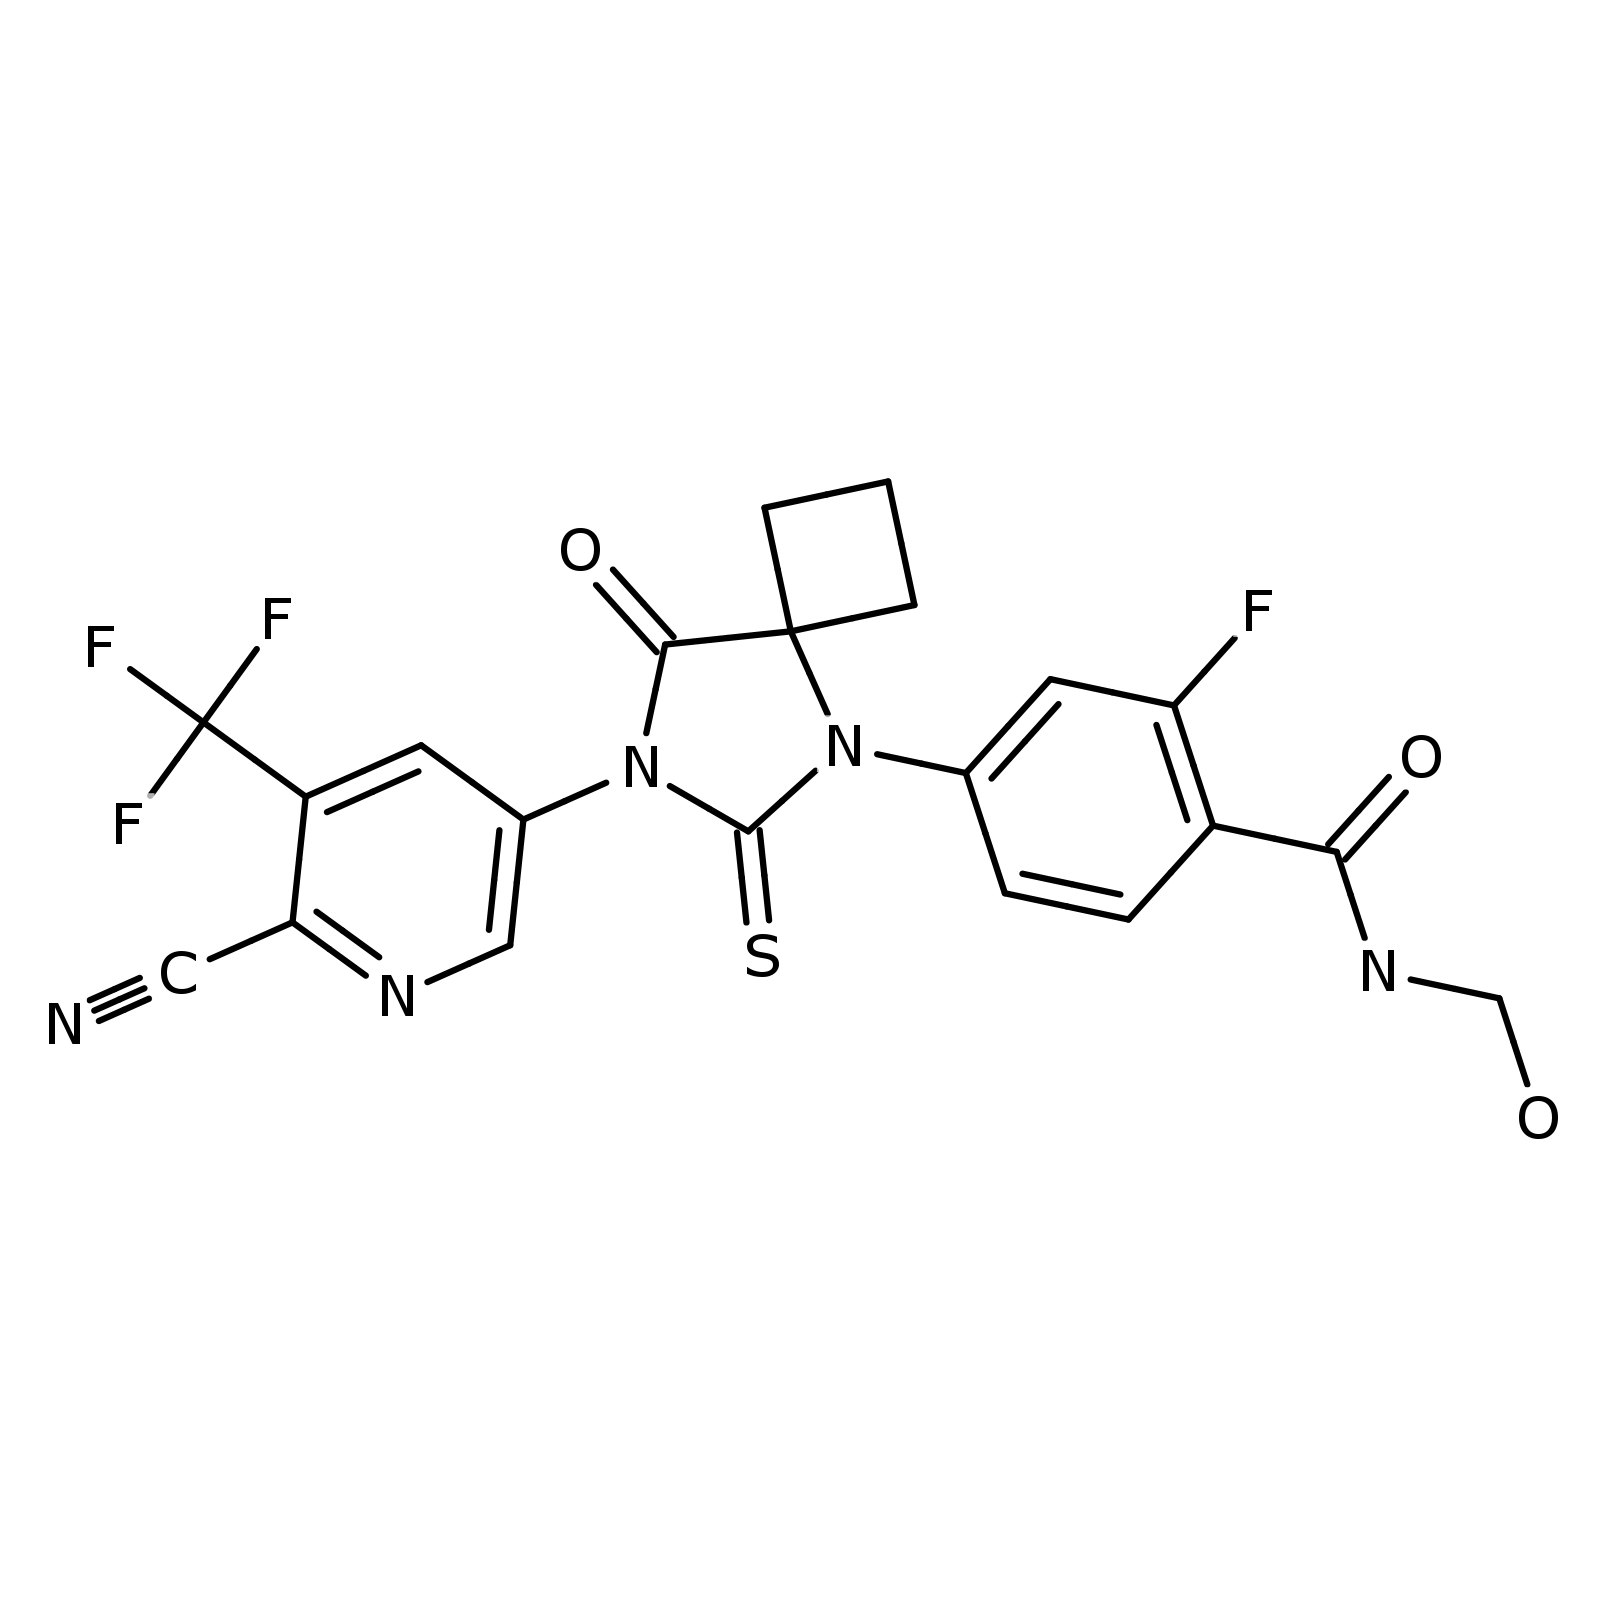 | D1 | Q | 700 | Oxidation of N-alkyl amide to hemiamidal | Oxidations | Oxygen; Radical or Light |
| 2 | 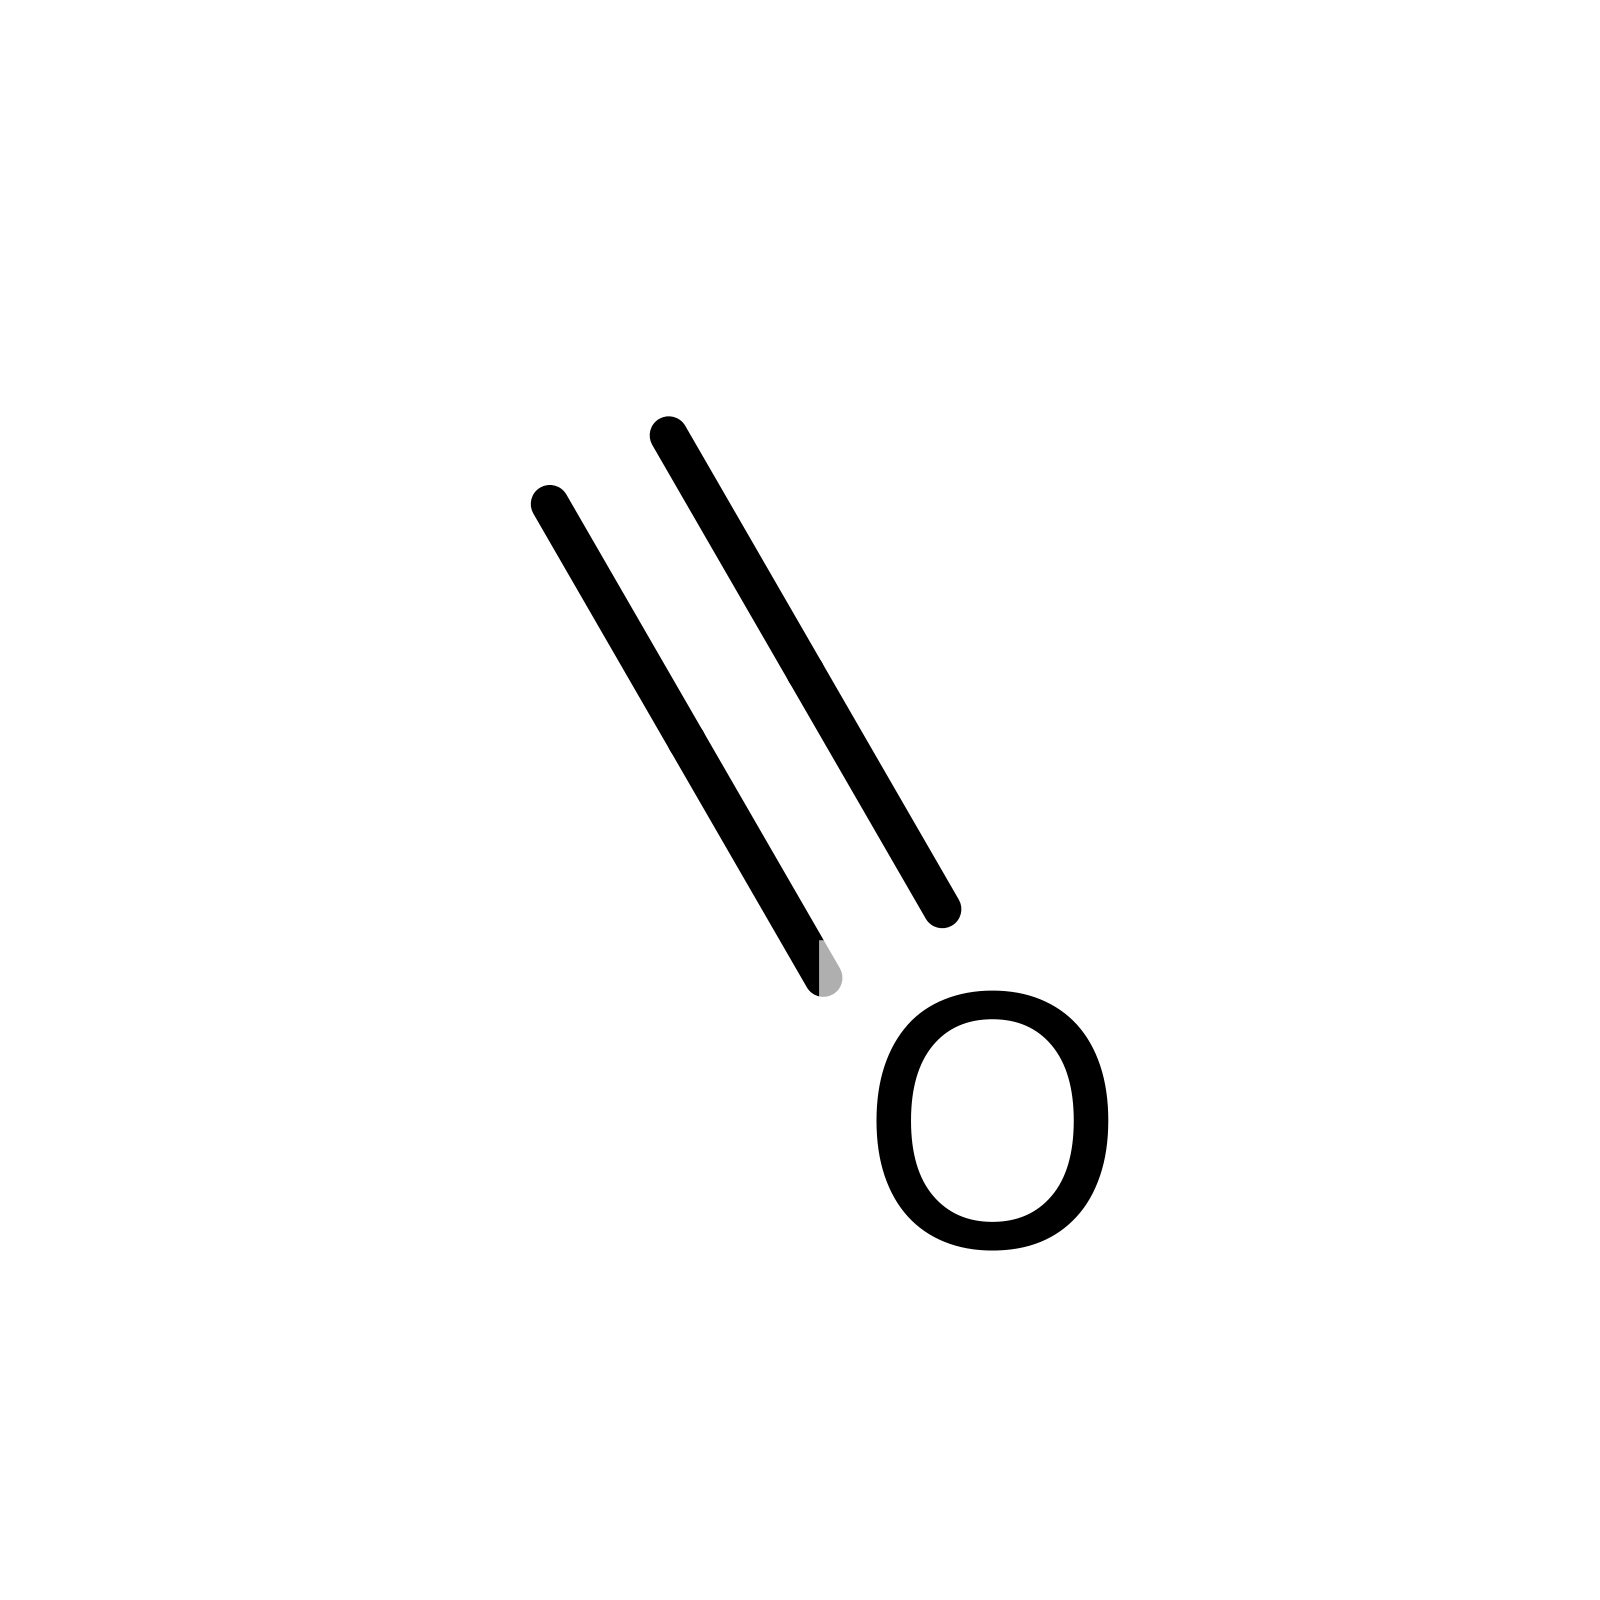 | D2 | D1 | 630 | Cleavage of acyclic hemiaminal, hemiacetal or hemimercaptal | Eliminations and fragmentations |  |
| 3 | 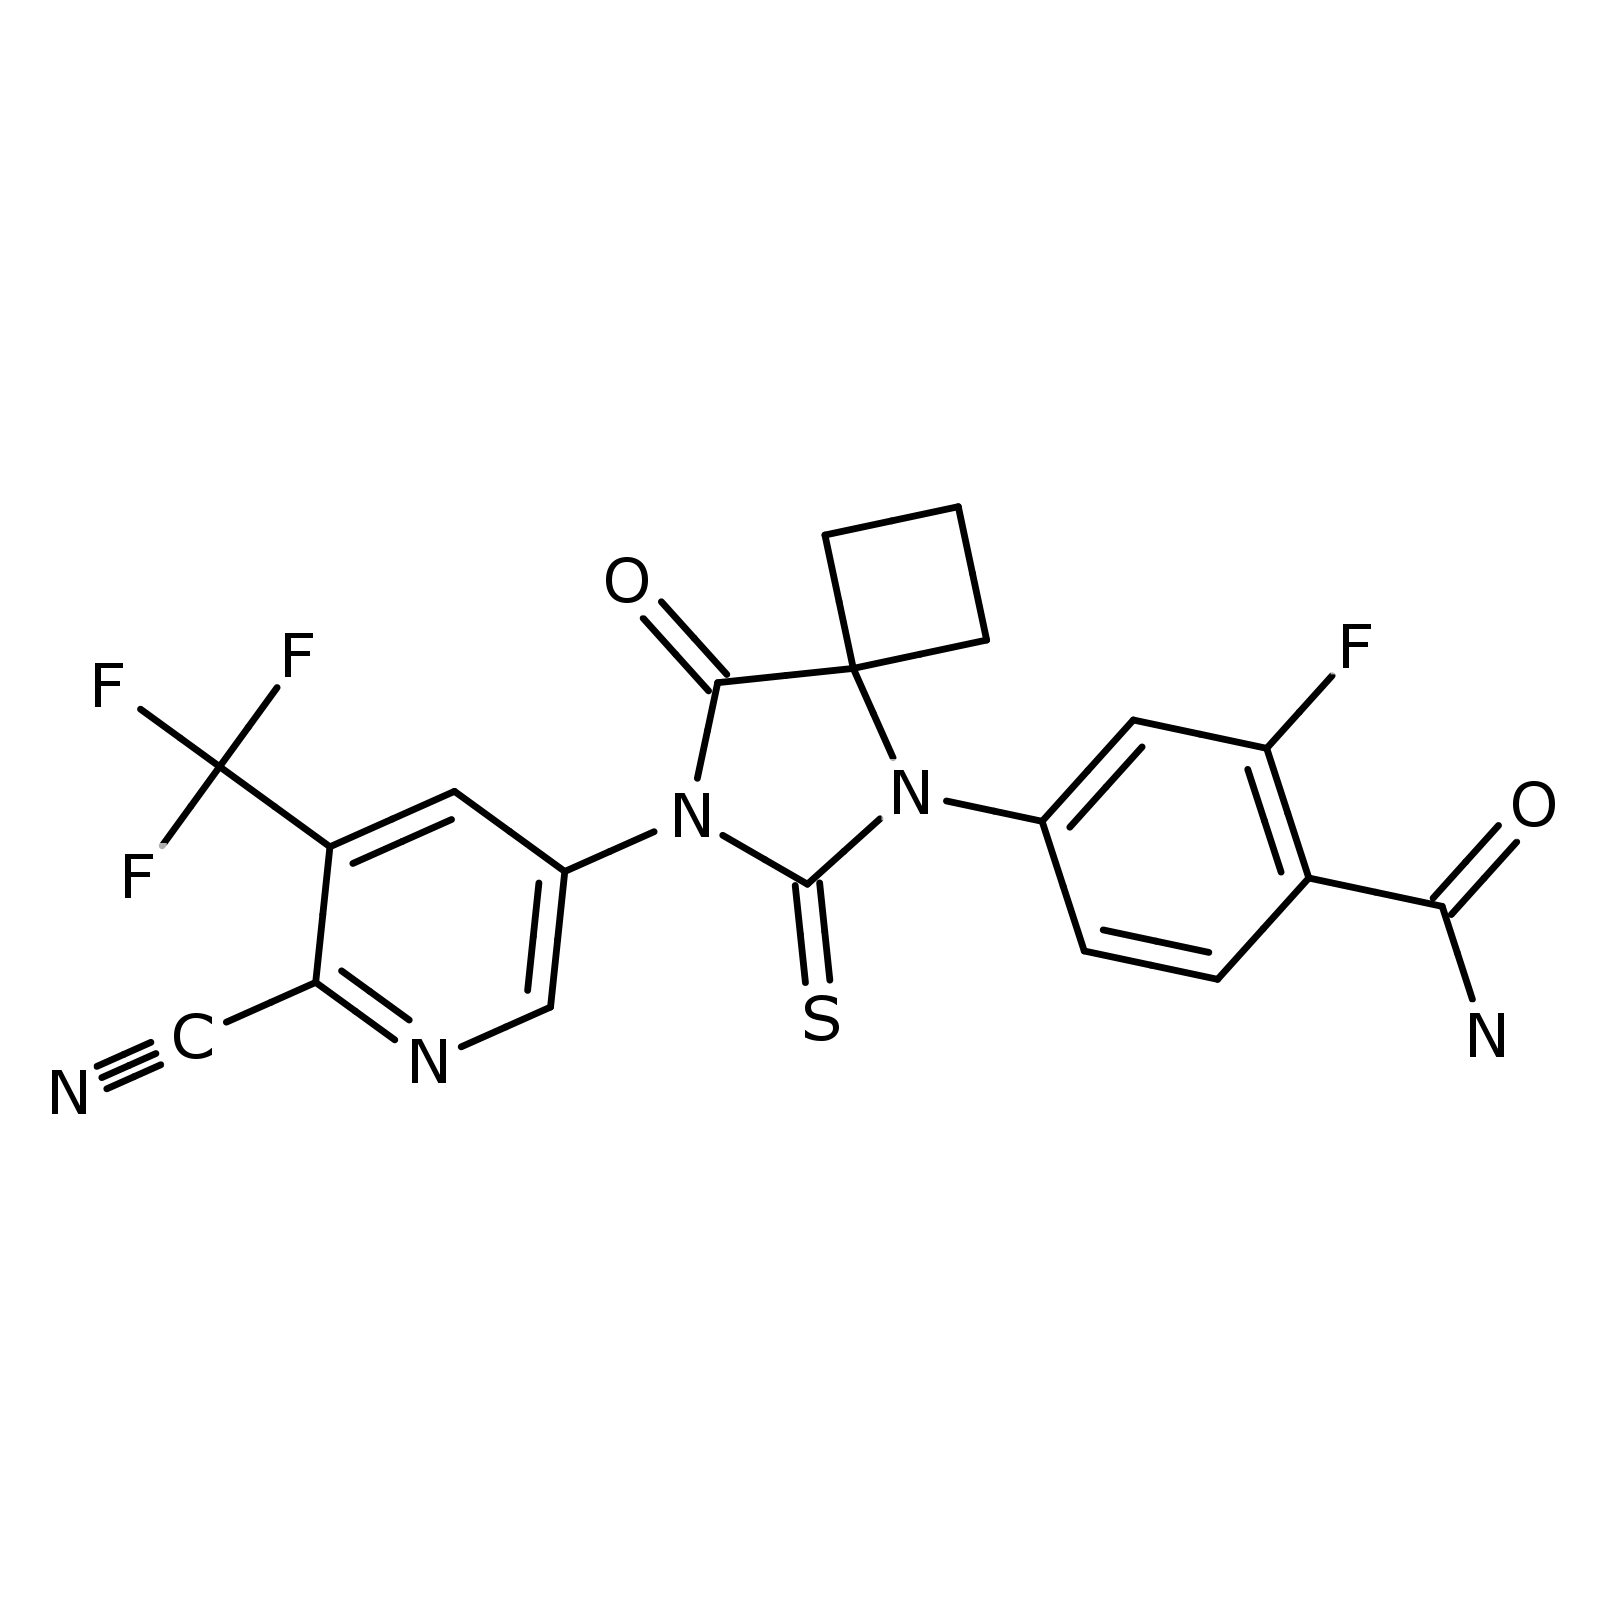 | D3 | D1 | 630 | Cleavage of acyclic hemiaminal, hemiacetal or hemimercaptal | Eliminations and fragmentations |  |
| **Oxidation** | | | | | | | |
| 1 | 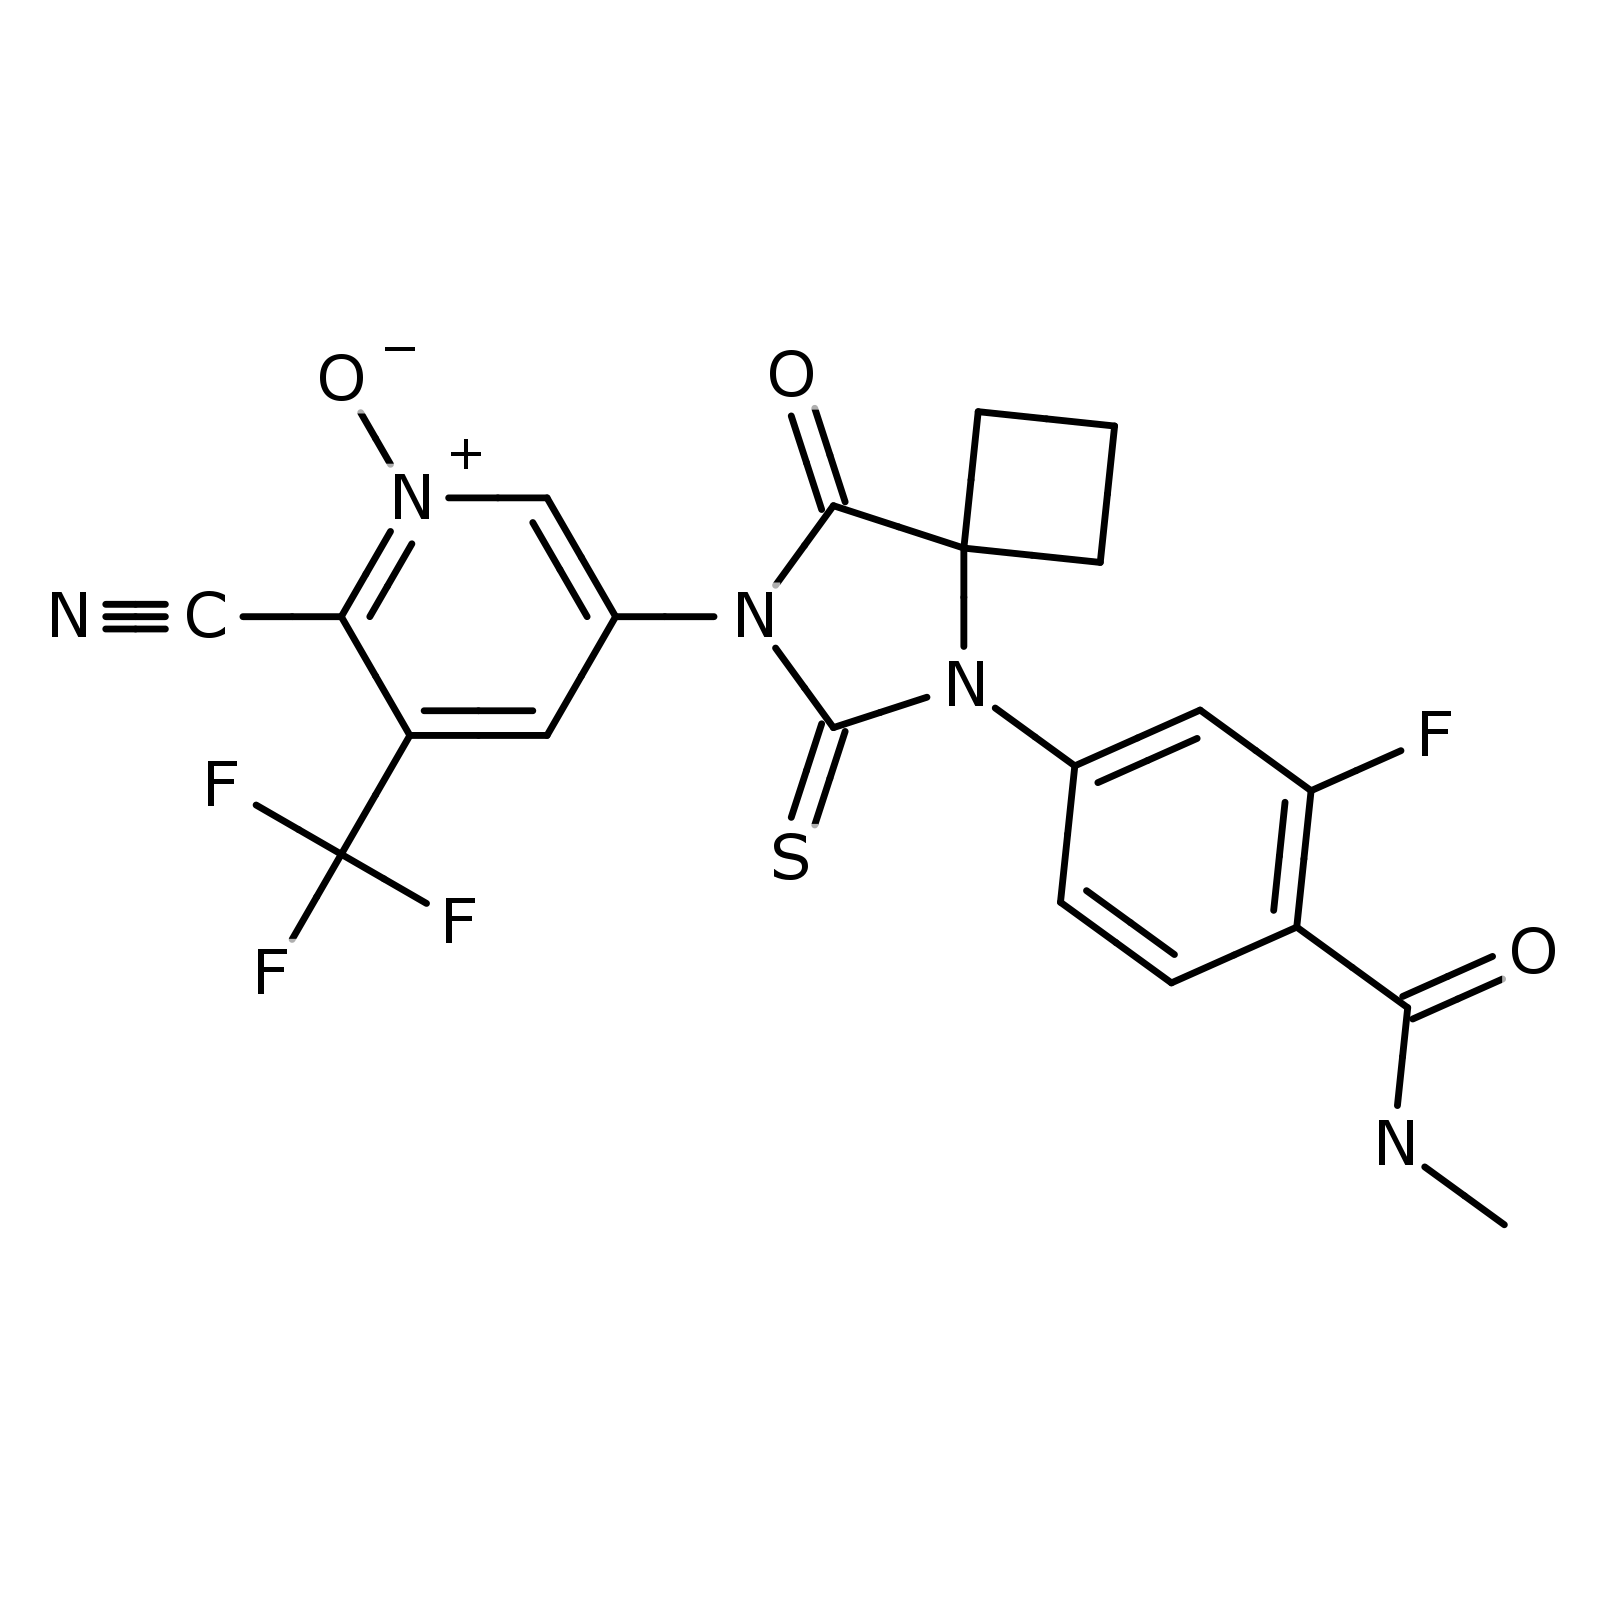 | D1 | Q | 700 | N-Oxidation of pyridine-type nitrogen | Oxidations | Oxygen or Peroxide; pH |

­
